# Supplementary material for: Novel Dipyridinium Lipophile-Based Ionic Liquids Tethering Hydrazone Linkage: Design, Synthesis and Antitumorigenic Study
Source: MDPI journal article supplement (doi:10.3390/ijms221910487), 2021-09-28
Supplement: s1 [file s1]

# **Novel dipyridinium lipophiles based ionic liquids tethering hydrazone linkage: Design, Synthesis and antitumorigenic study**

Salsabeel Al-Sodies<sup>1</sup>, Nadjat Rezki<sup>1,\*</sup>, Fawzia Faleh Albelwi<sup>1</sup>,  
Mouslim Messali<sup>1</sup>, Mohamed R. Aouad<sup>1</sup>, Sanaa K. Bardaweel<sup>2,\*</sup>,  
Mohamed Hagar<sup>3</sup>

*<sup>a</sup>Department of Chemistry, Faculty of Science, Taibah University, Al-Madinah Al-Munawarah 30002, Saudi Arabia*

*<sup>b</sup>Department of Pharmaceutical Sciences, Faculty of Pharmacy, University of Jordan, Amman 11942, Jordan*

*<sup>c</sup>Chemistry Department, Faculty of Science, Alexandria University, Alexandria 21321, Egypt*

## Spectroscopic characterization

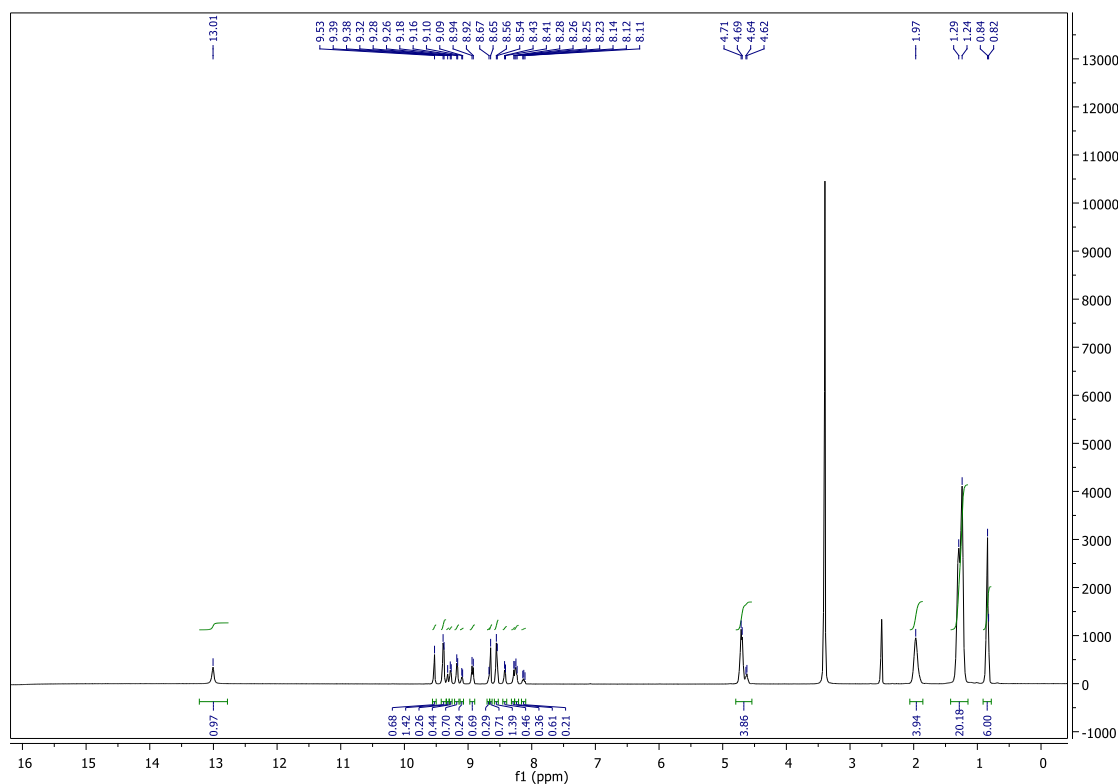

Figure S1.  $^1\text{H}$  NMR of Compound 9

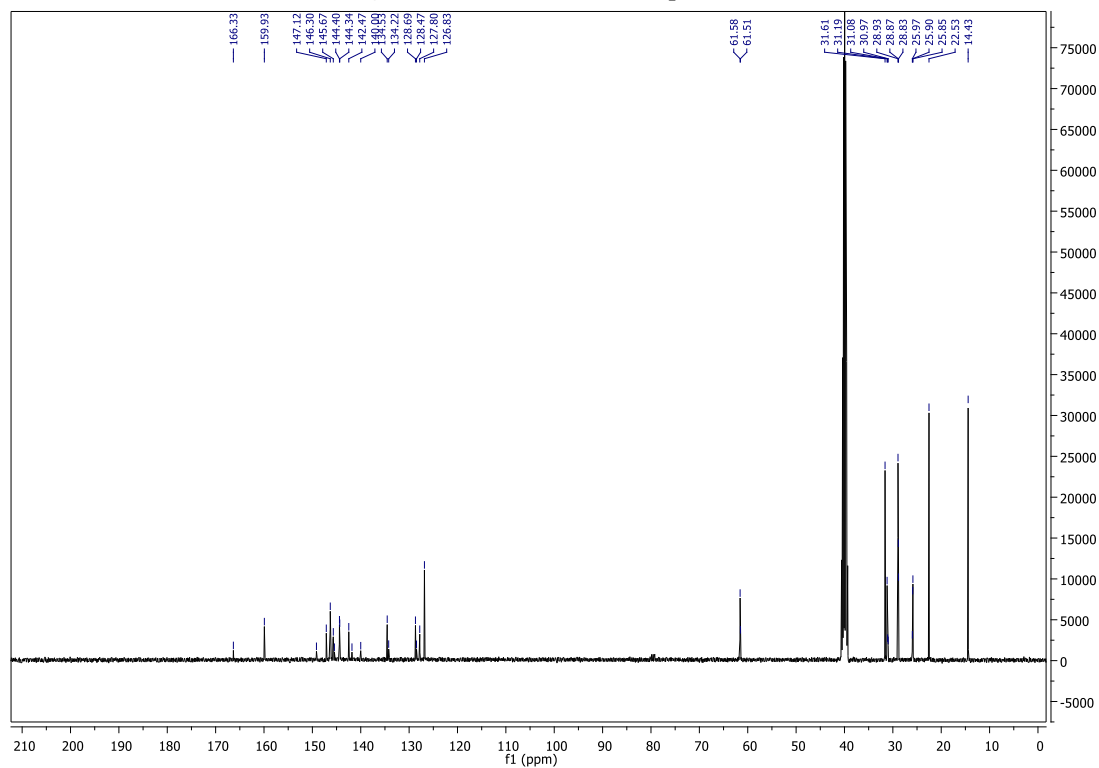

Figure S2.  $^{13}\text{C}$  NMR of Compound 9

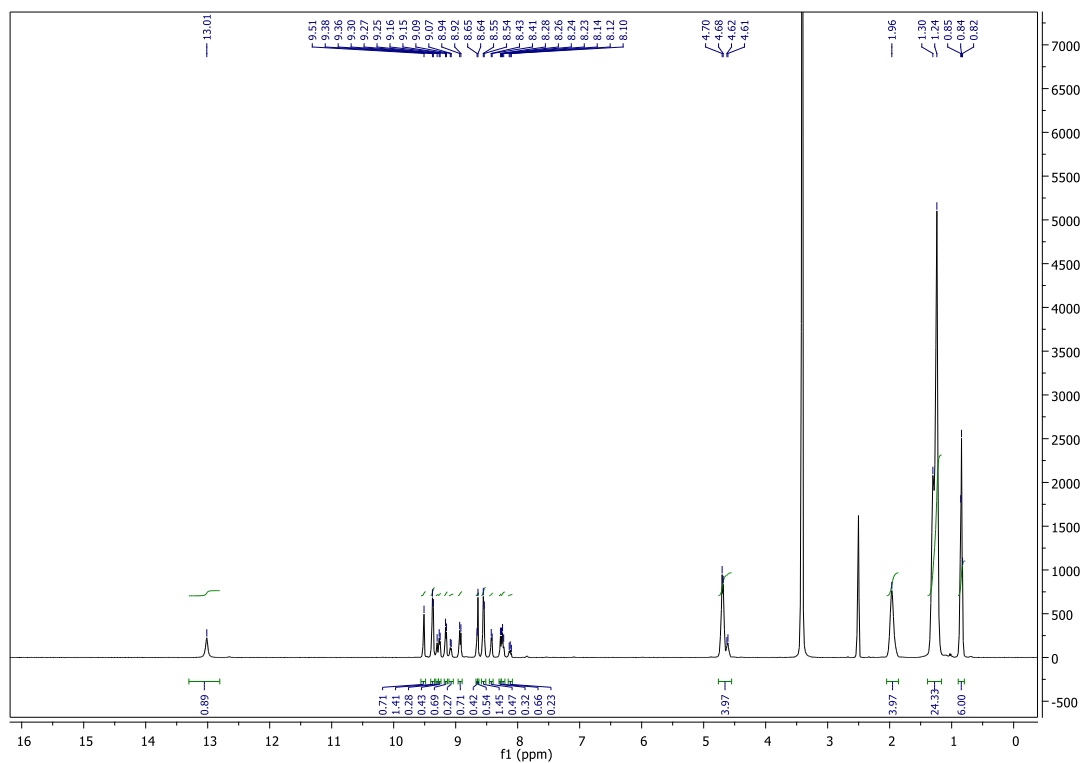

Figure S3.  $^1\text{H}$  NMR of Compound 10

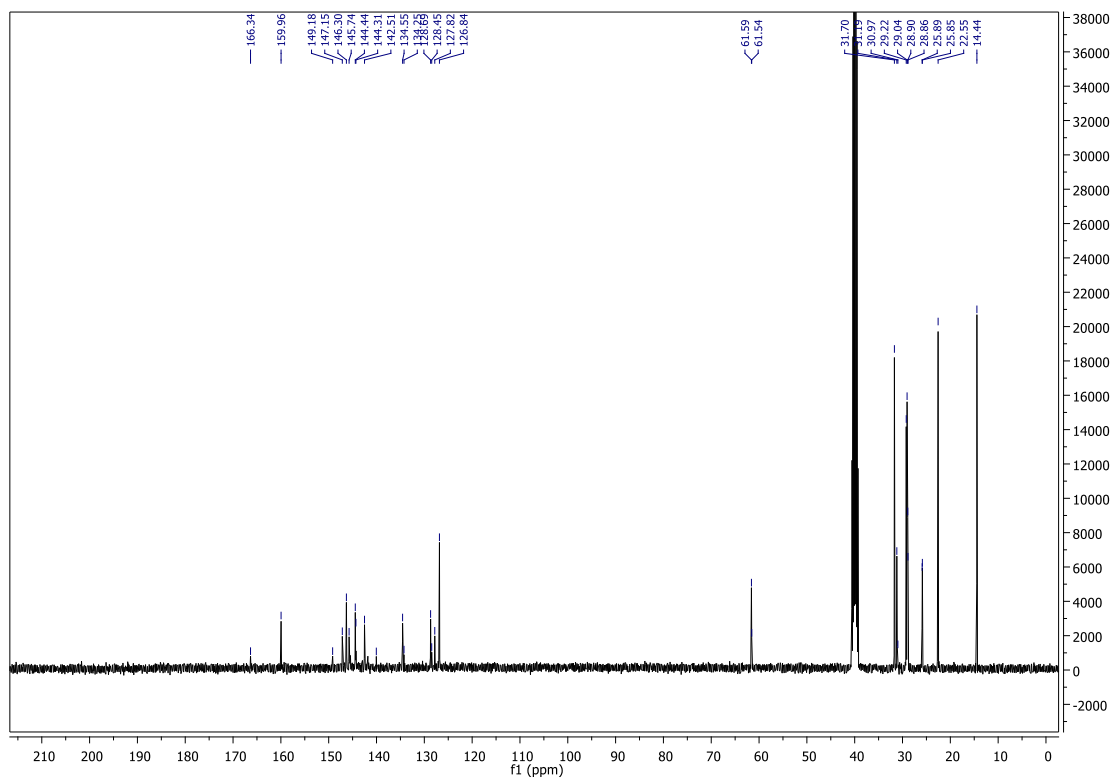

Figure S4.  $^{13}\text{C}$  NMR of Compound 10

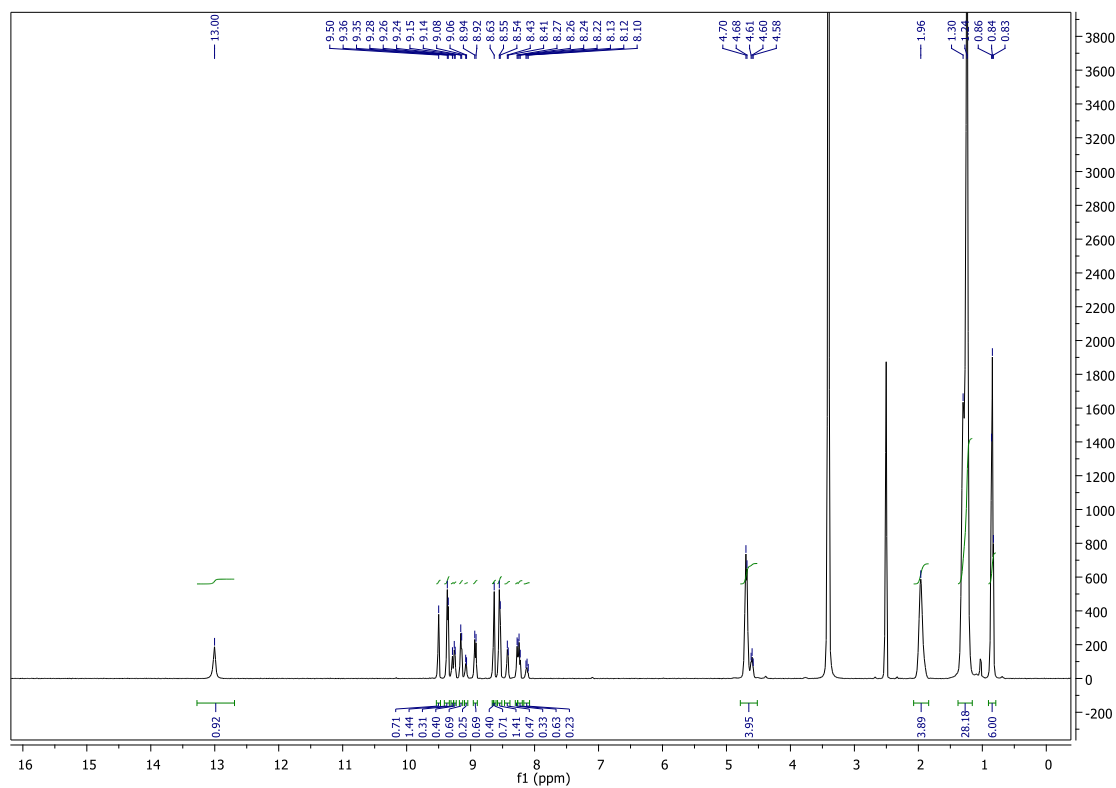

Figure S5. <sup>1</sup>H NMR of Compound 11

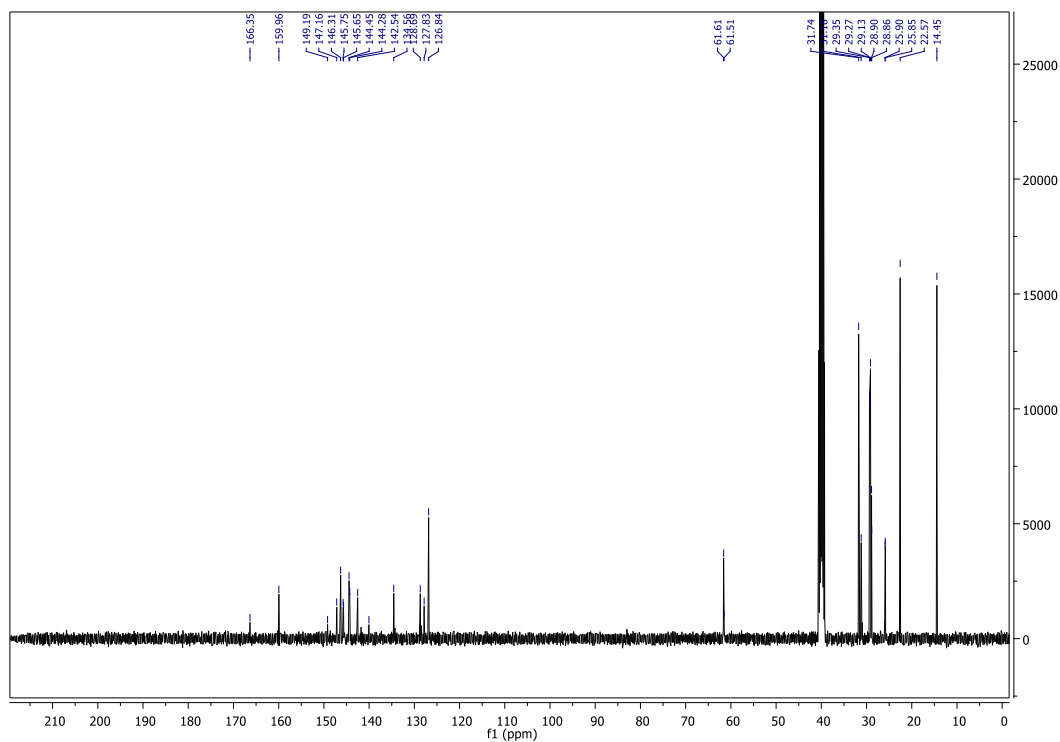

Figure S6. <sup>13</sup>C NMR of Compound 11

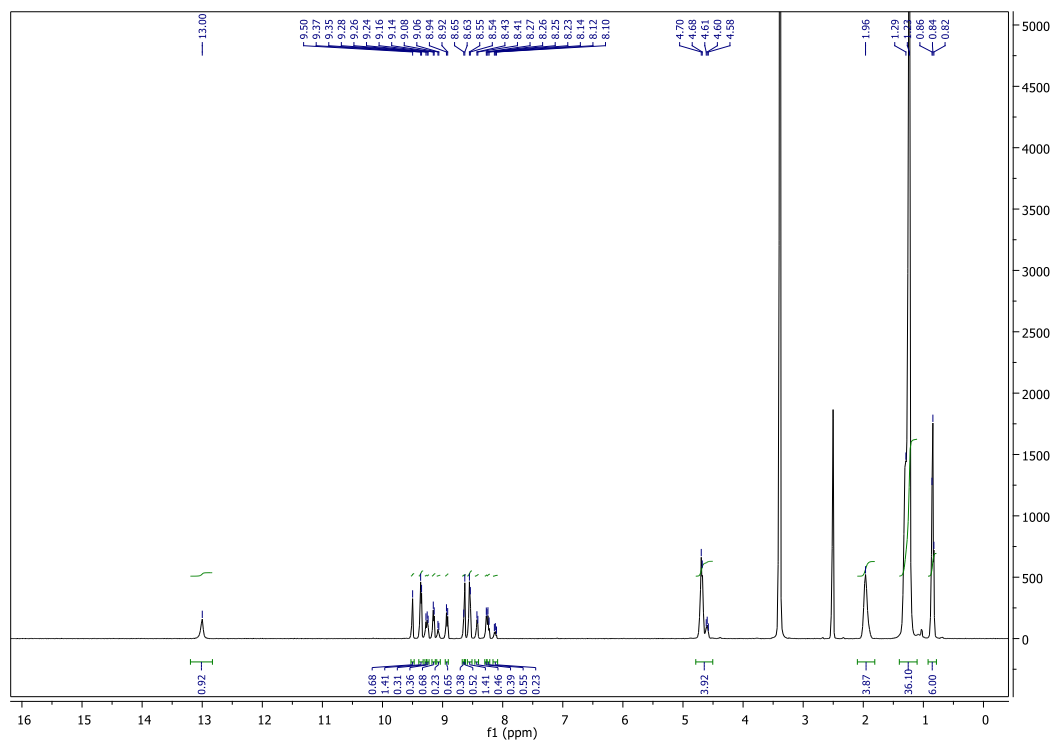

Figure S7.  $^1\text{H}$  NMR of Compound 12

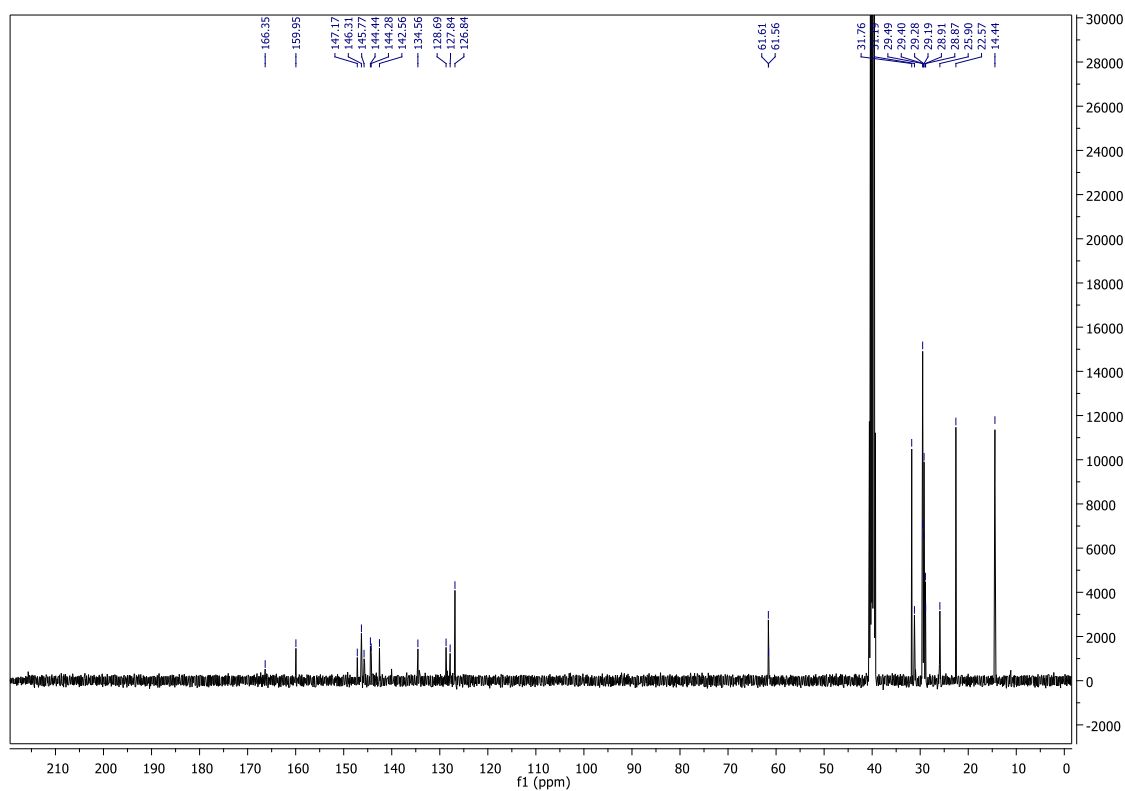

Figure S8.  $^{13}\text{C}$  NMR of Compound 12

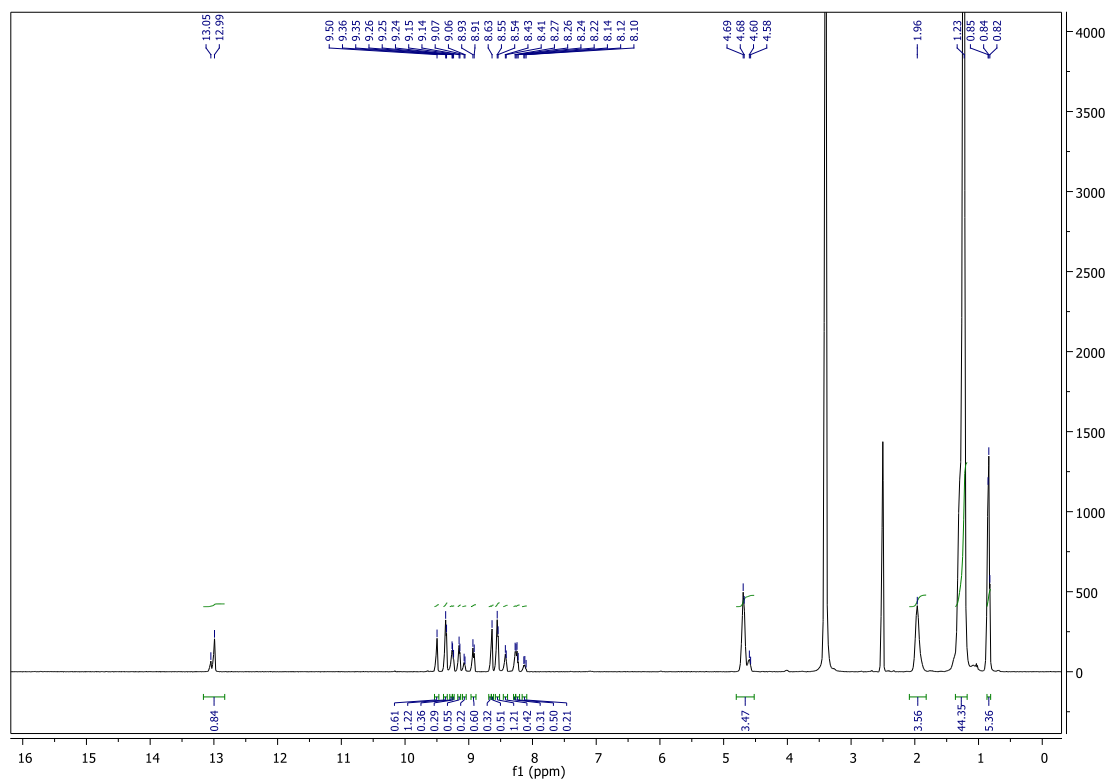

Figure S9.  $^1\text{H}$  NMR of Compound 13

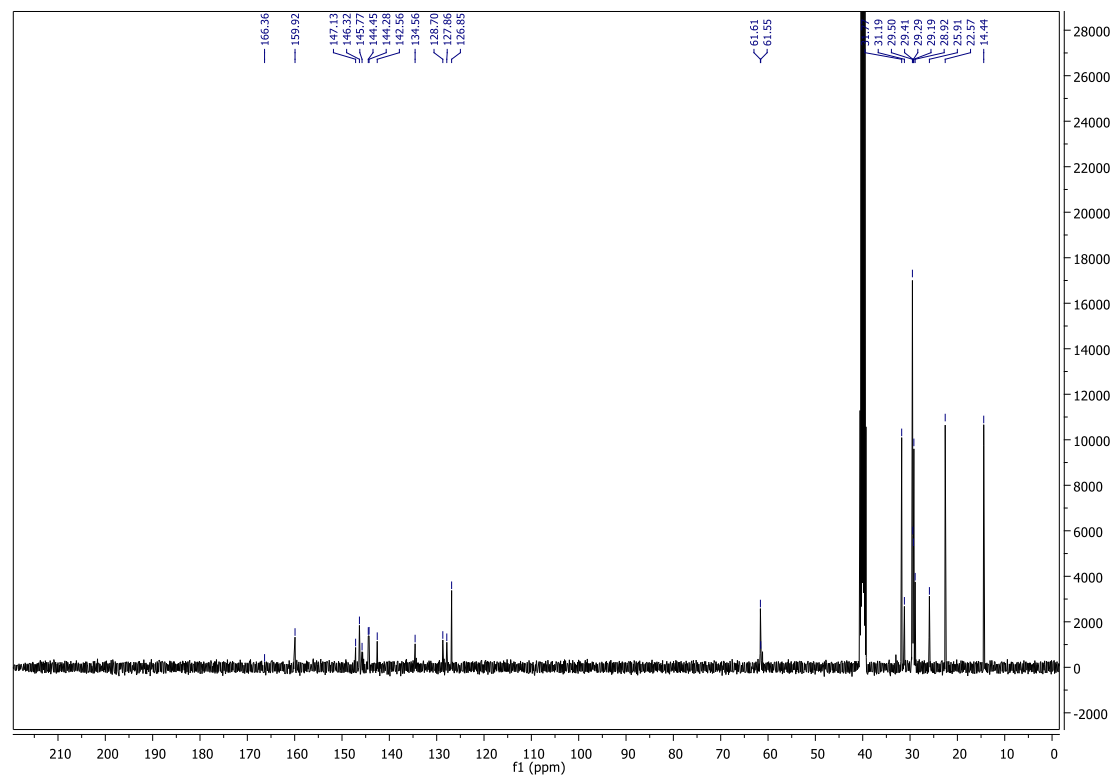

Figure S10.  $^{13}\text{C}$  NMR of Compound 13

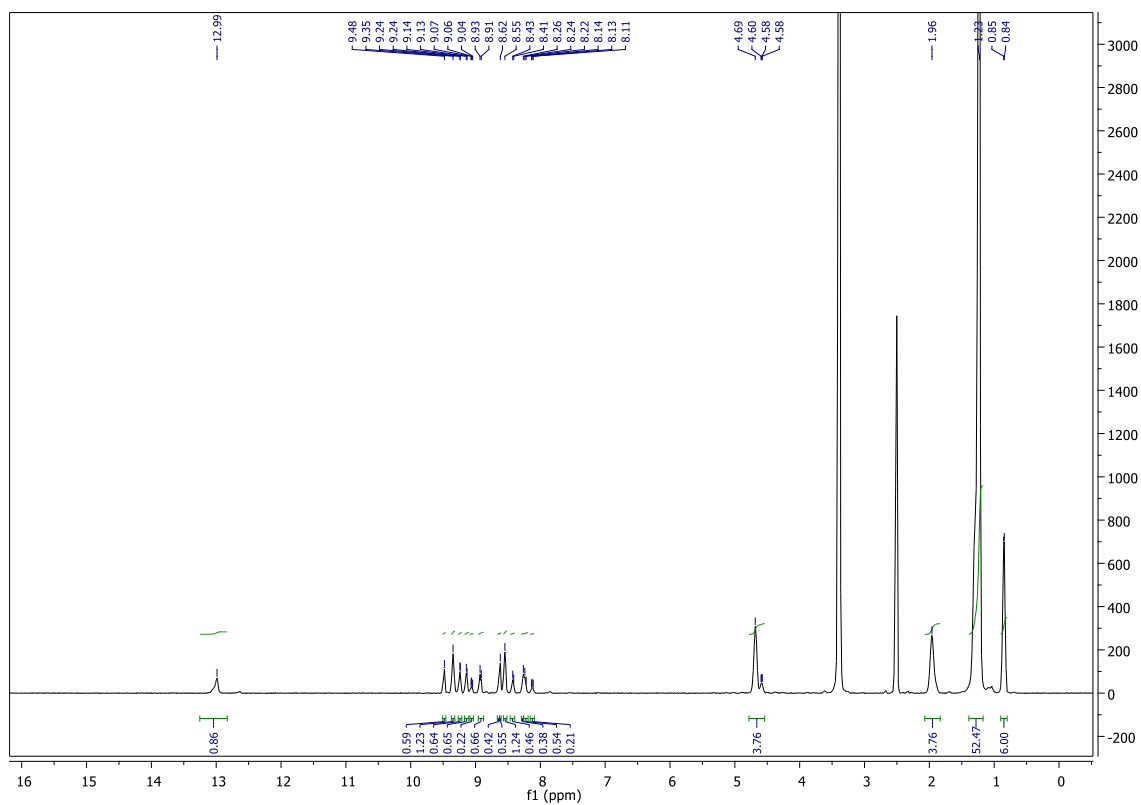

Figure S11. <sup>1</sup>H NMR of Compound 14

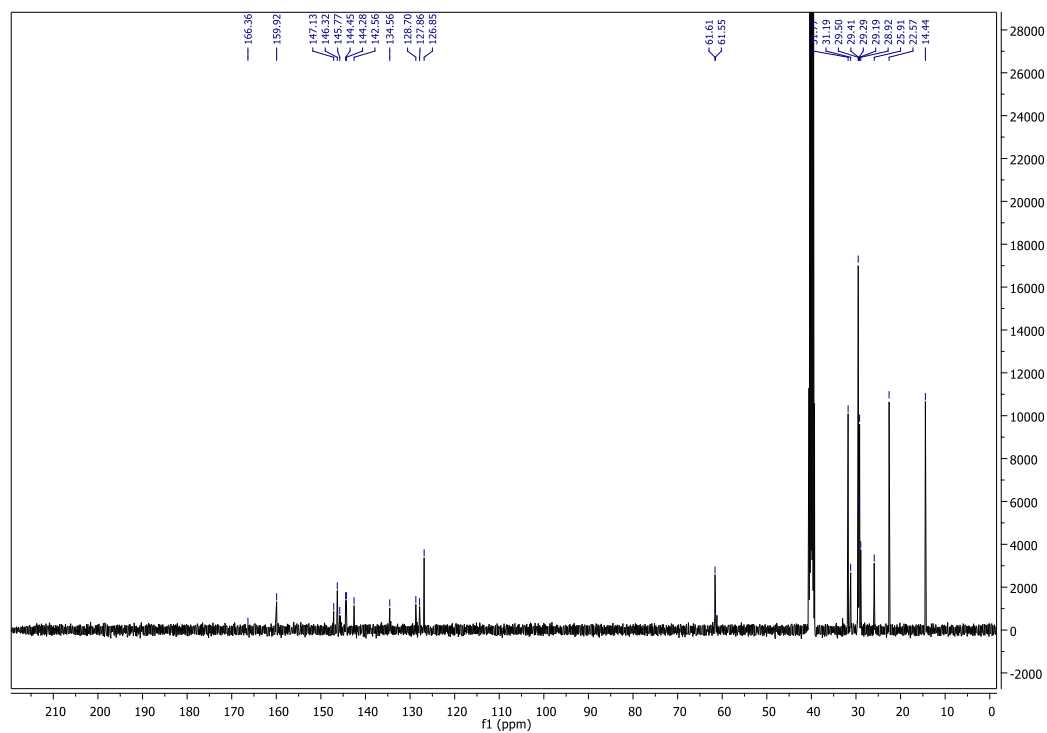

Figure S12. <sup>13</sup>C NMR of Compound 14

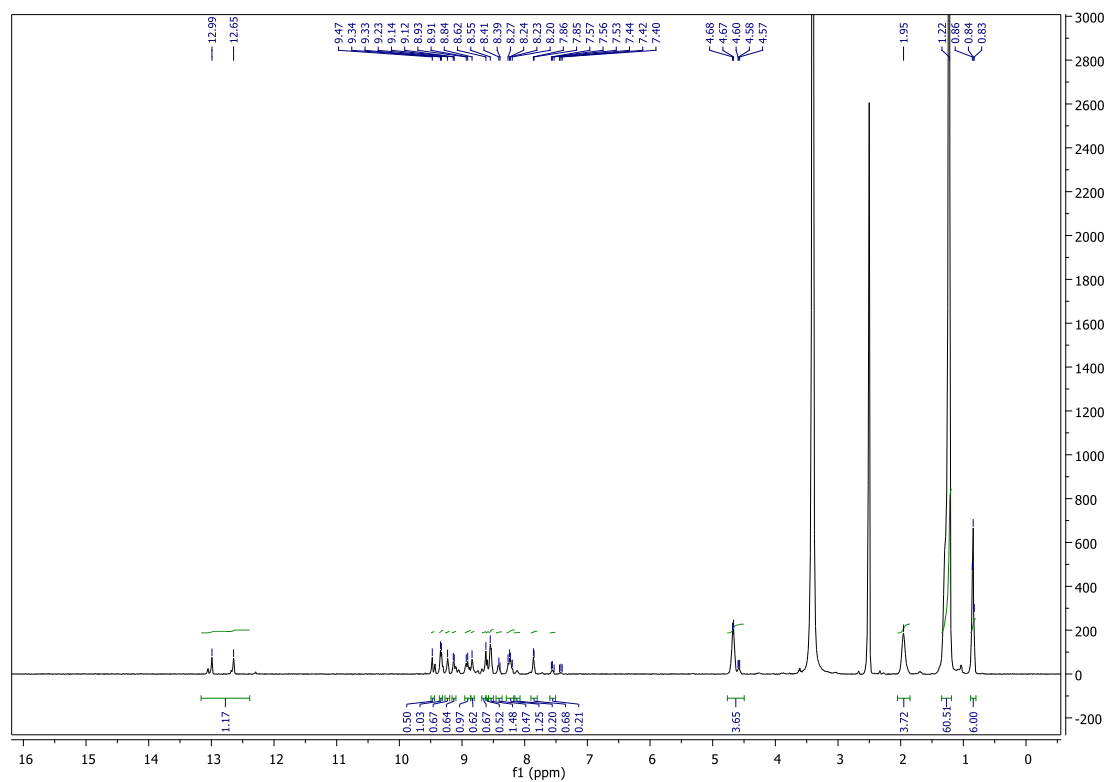

Figure S13.  $^1\text{H}$  NMR of Compound 15

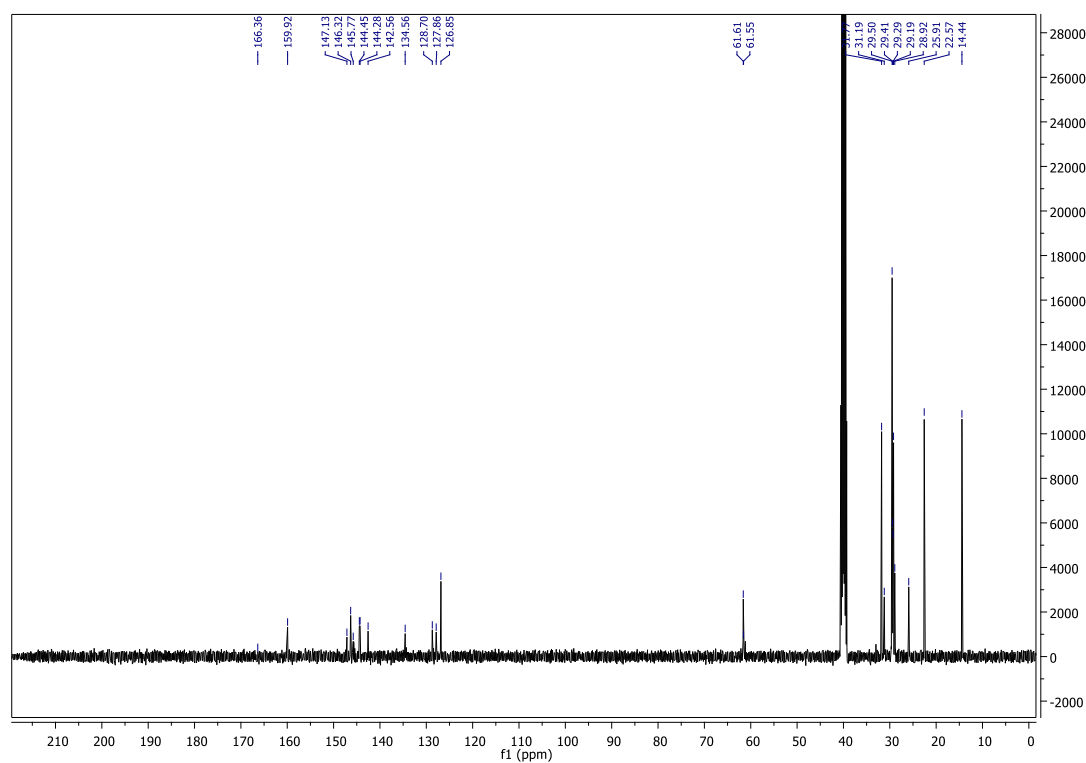

Figure S14.  $^{13}\text{C}$  NMR of Compound 15



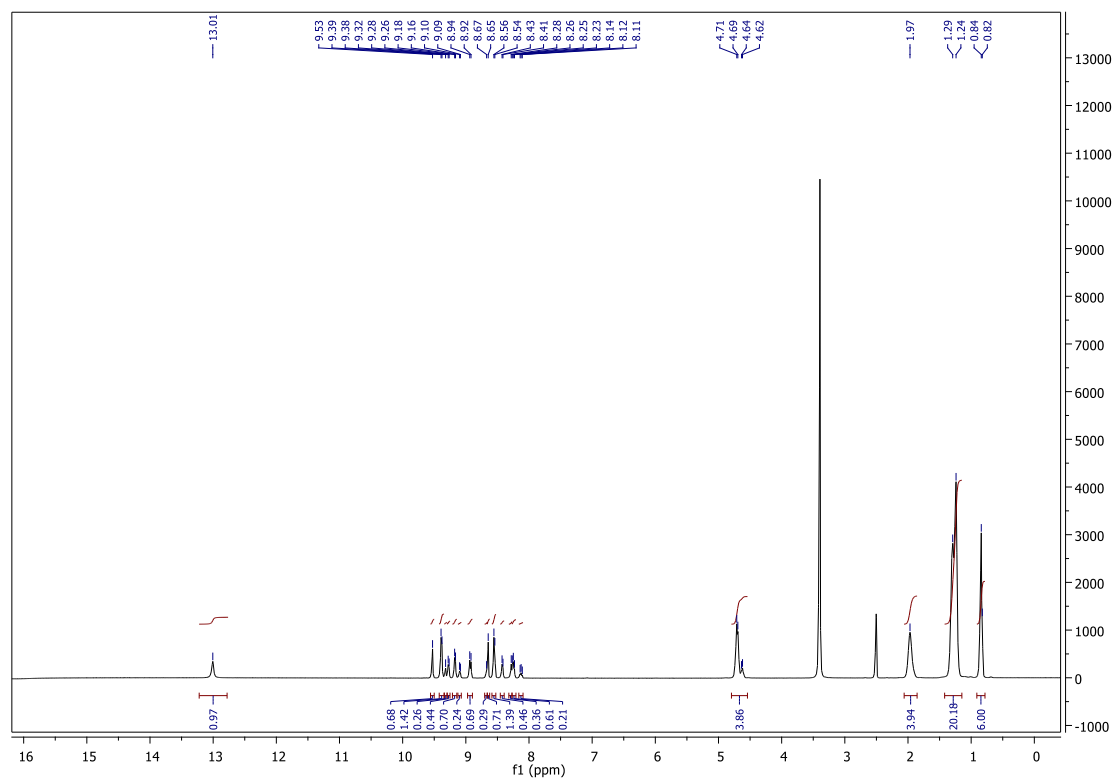

Figure S15.  $^1\text{H}$  NMR of Compound 16

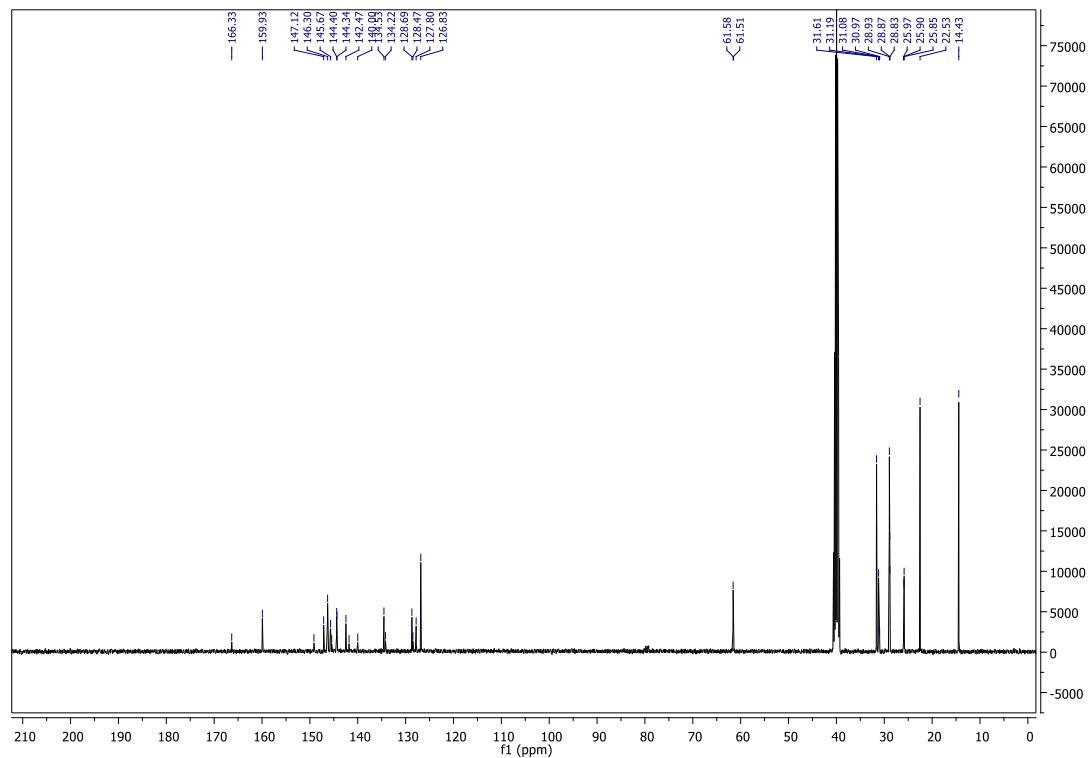

Figure S16.  $^{13}\text{C}$  NMR of Compound 16

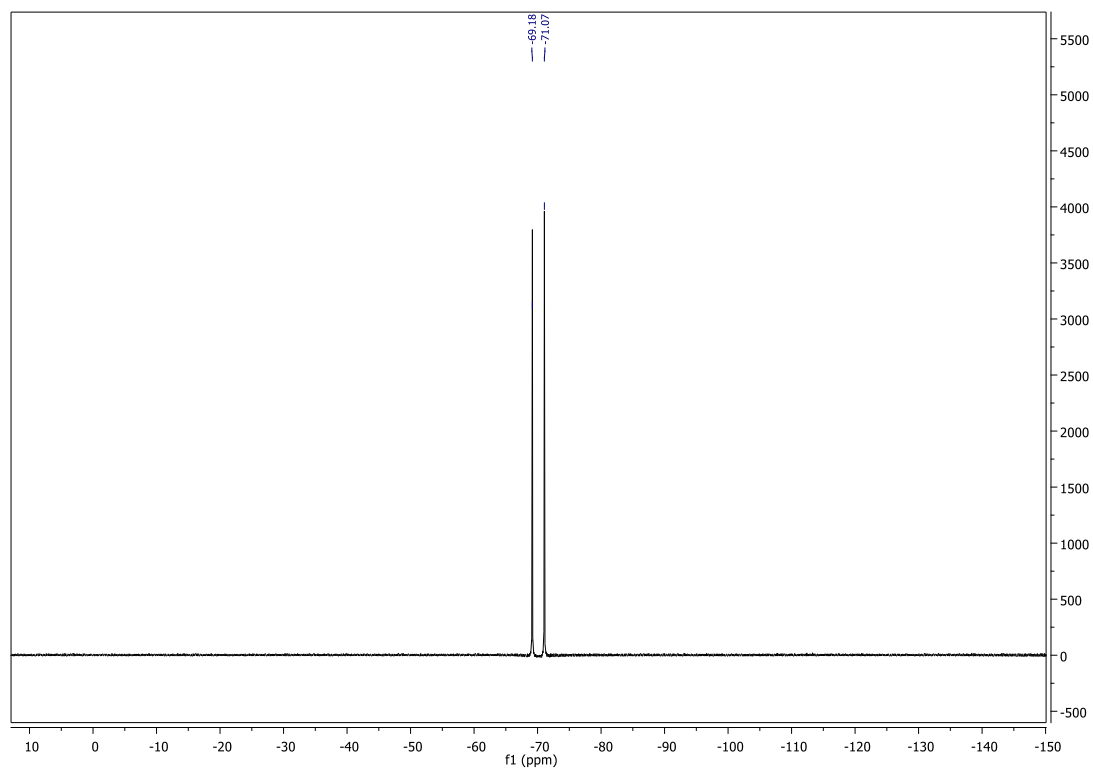

Figure S17.  $^{19}\text{F}$  NMR of Compound 16

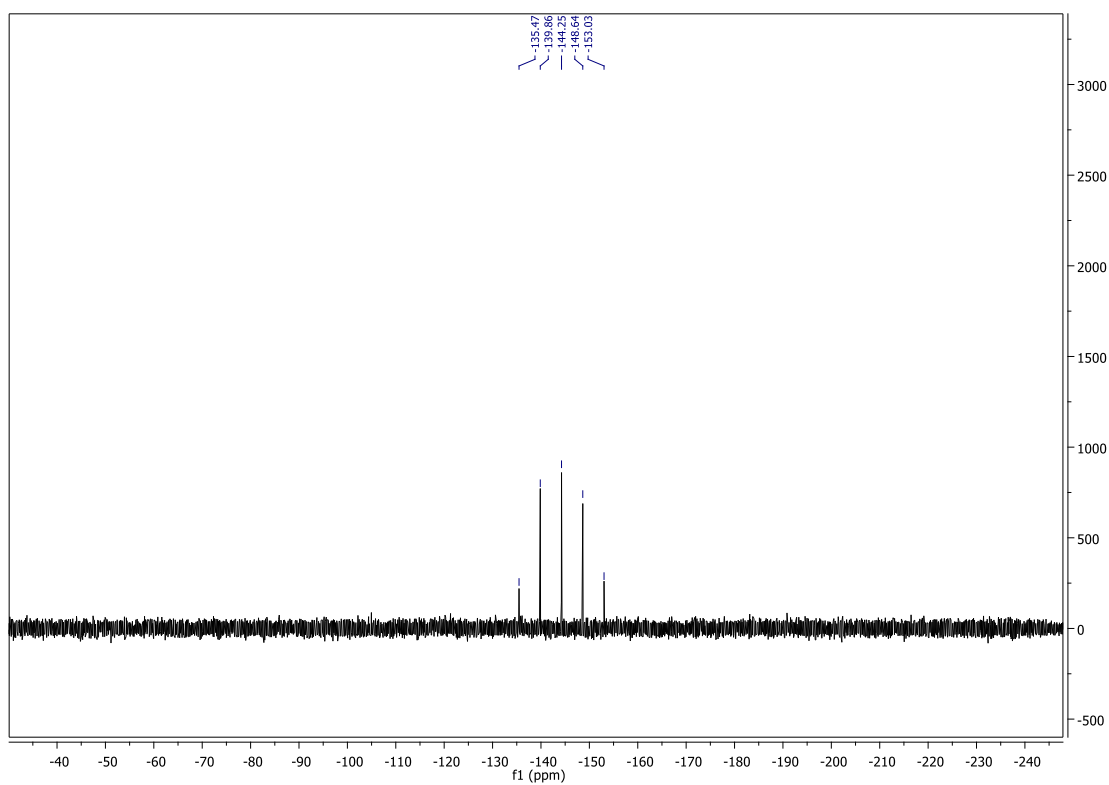

Figure S18.  $^{31}\text{P}$  NMR of Compound 16

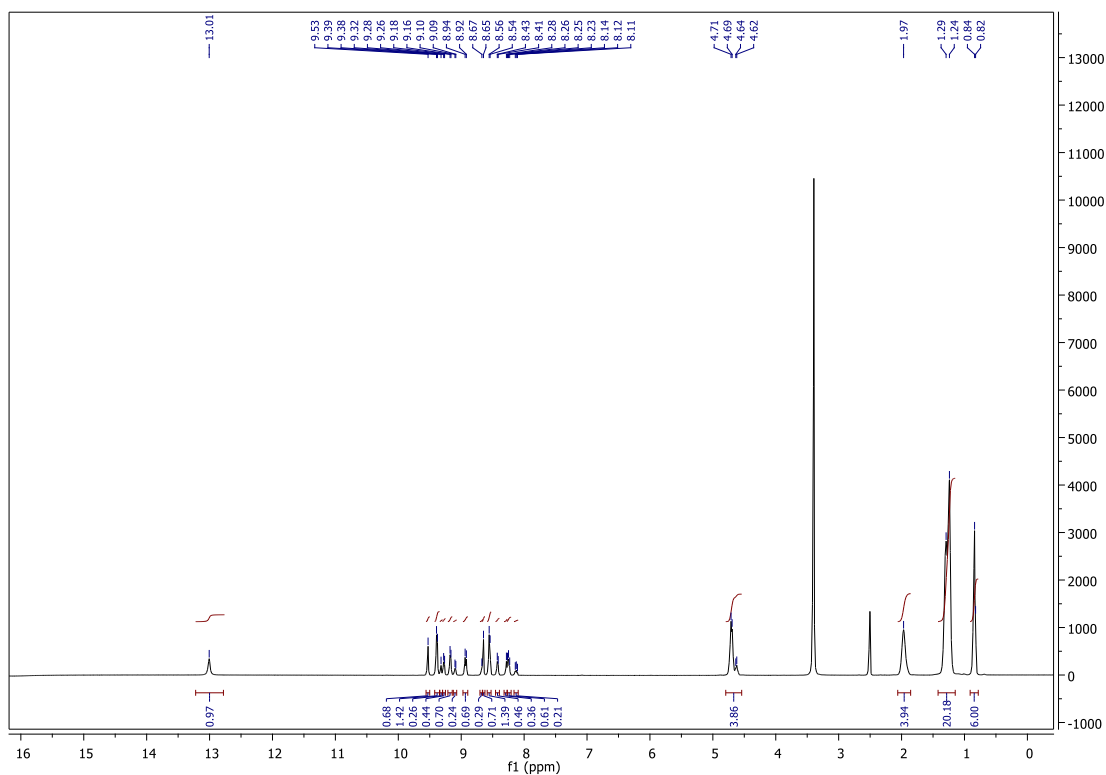

Figure S19. <sup>1</sup>H NMR of Compound 17

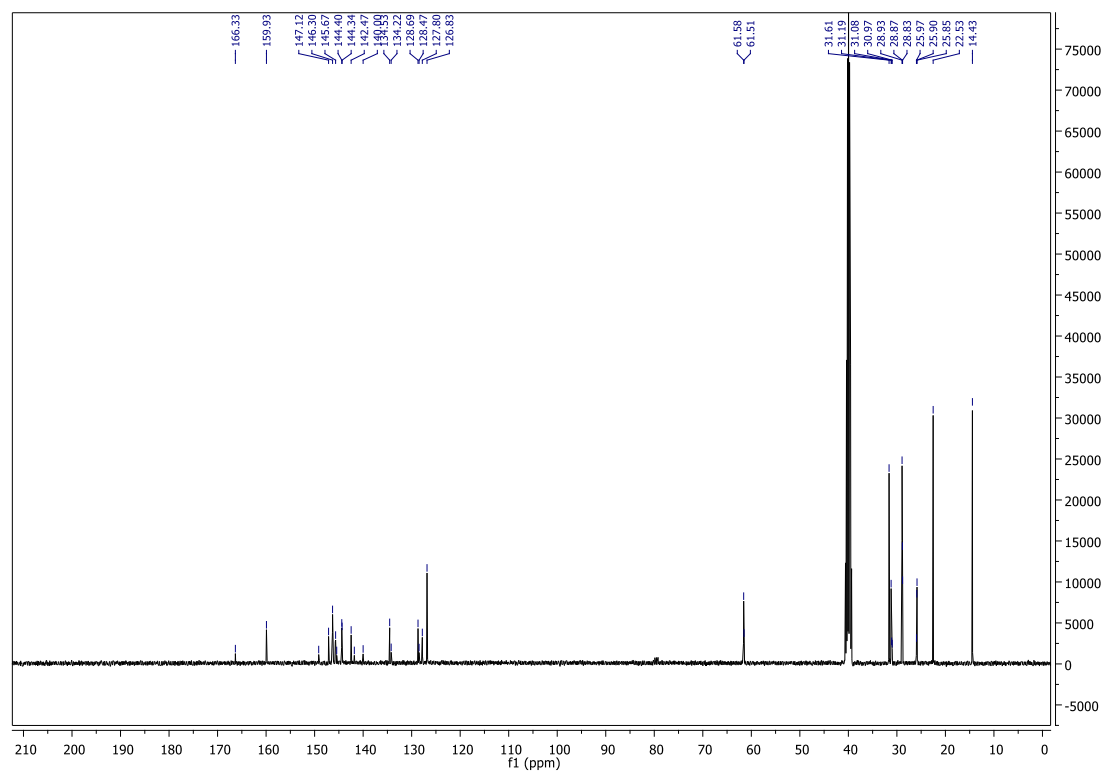

Figure S20. <sup>13</sup>C NMR of Compound 17

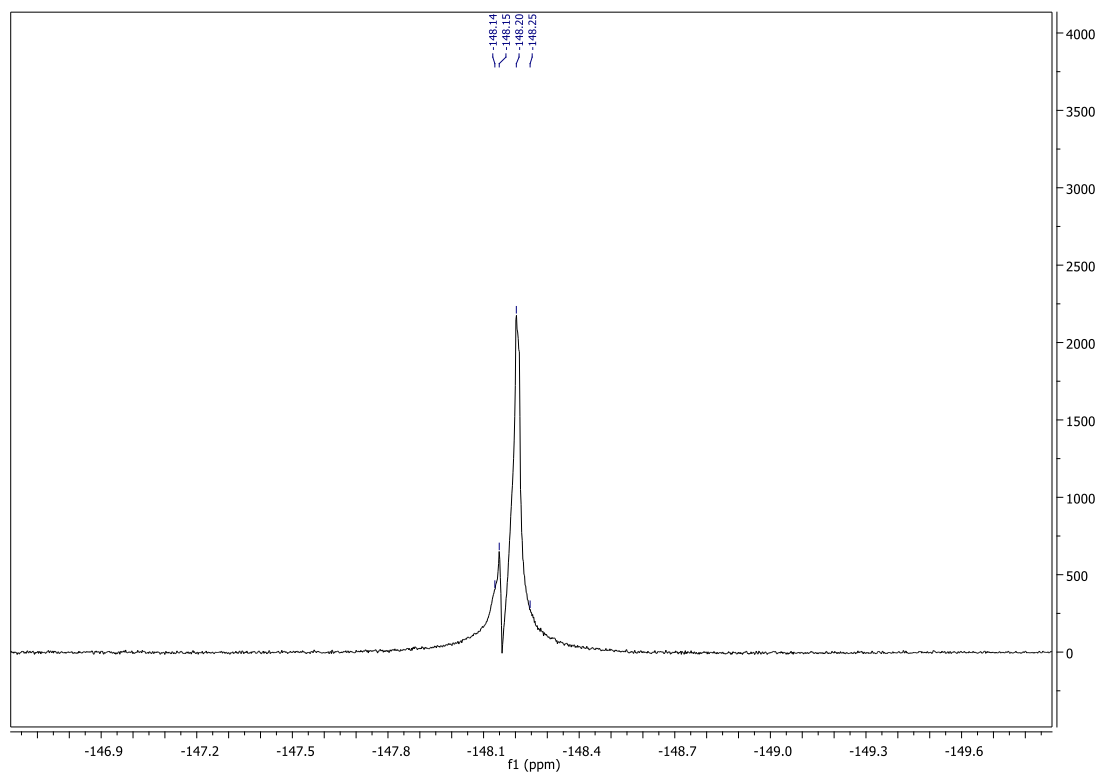

Figure S21.  $^{19}\text{F}$  NMR of Compound 17

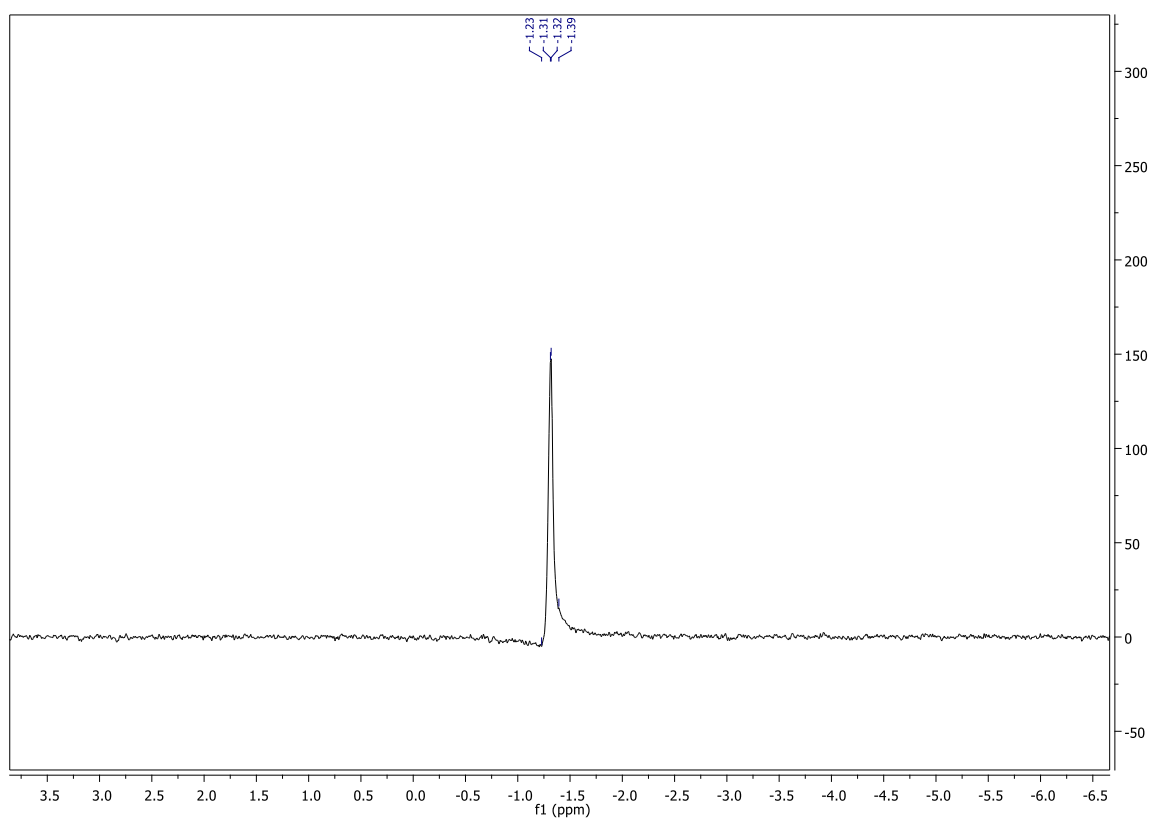

Figure S22.  $^{11}\text{B}$  NMR of Compound 17

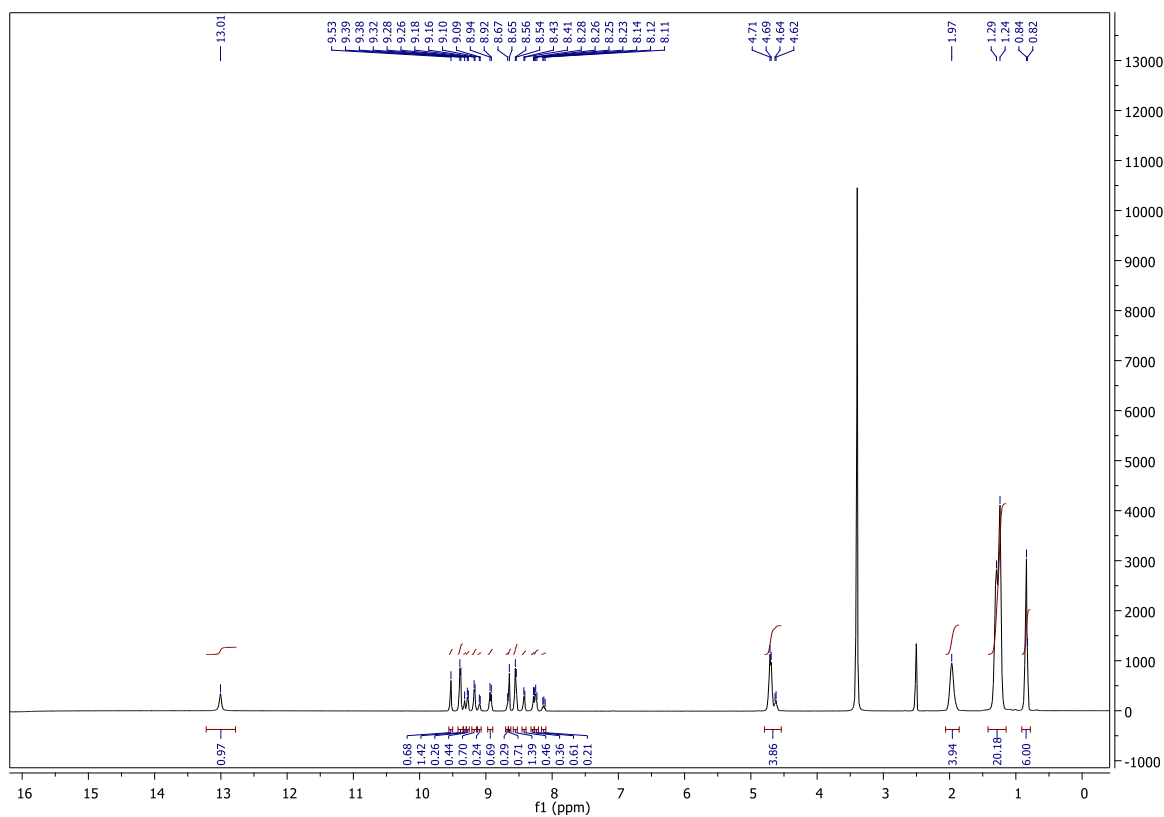

Figure S23. <sup>1</sup>H NMR of Compound 18

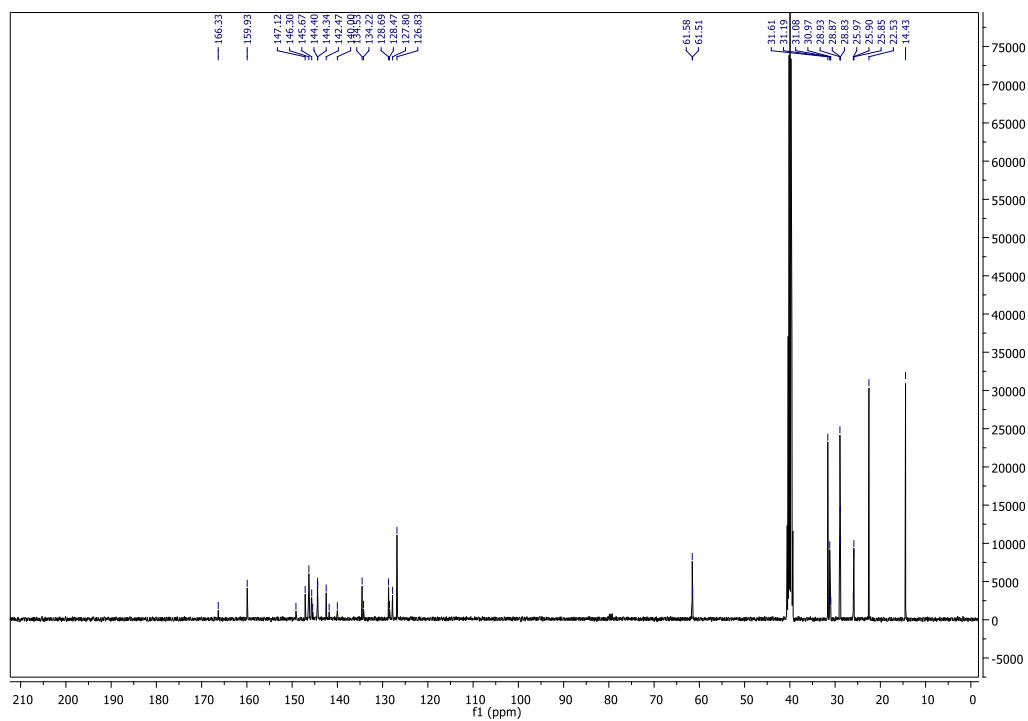

Figure S24. <sup>13</sup>C NMR of Compound 18

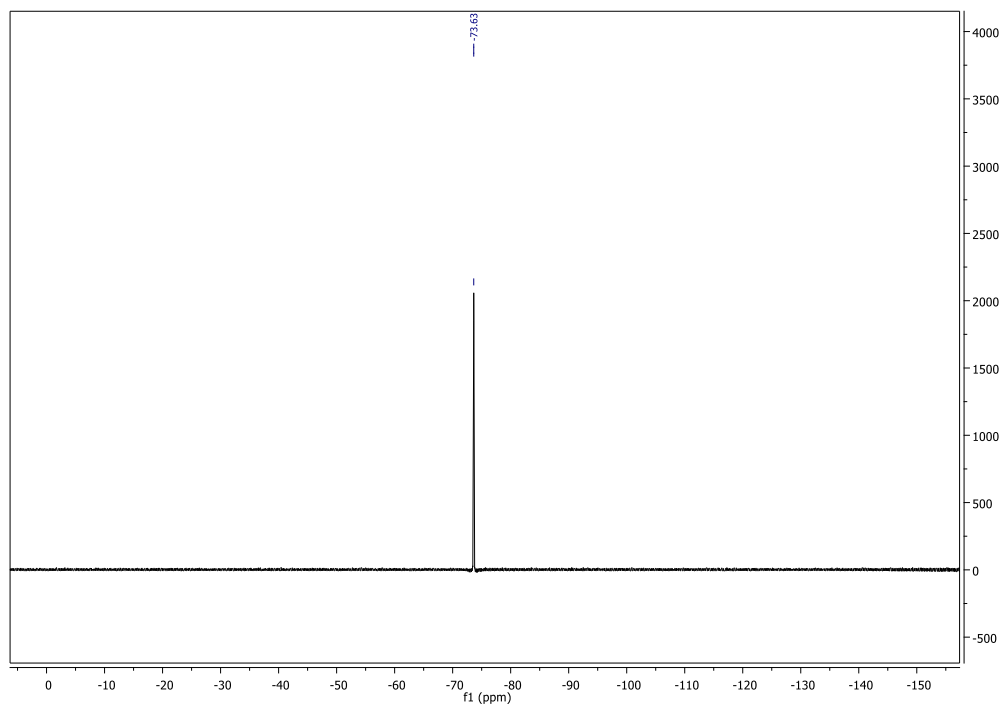

Figure S25.  $^{19}\text{F}$  NMR of Compound 18

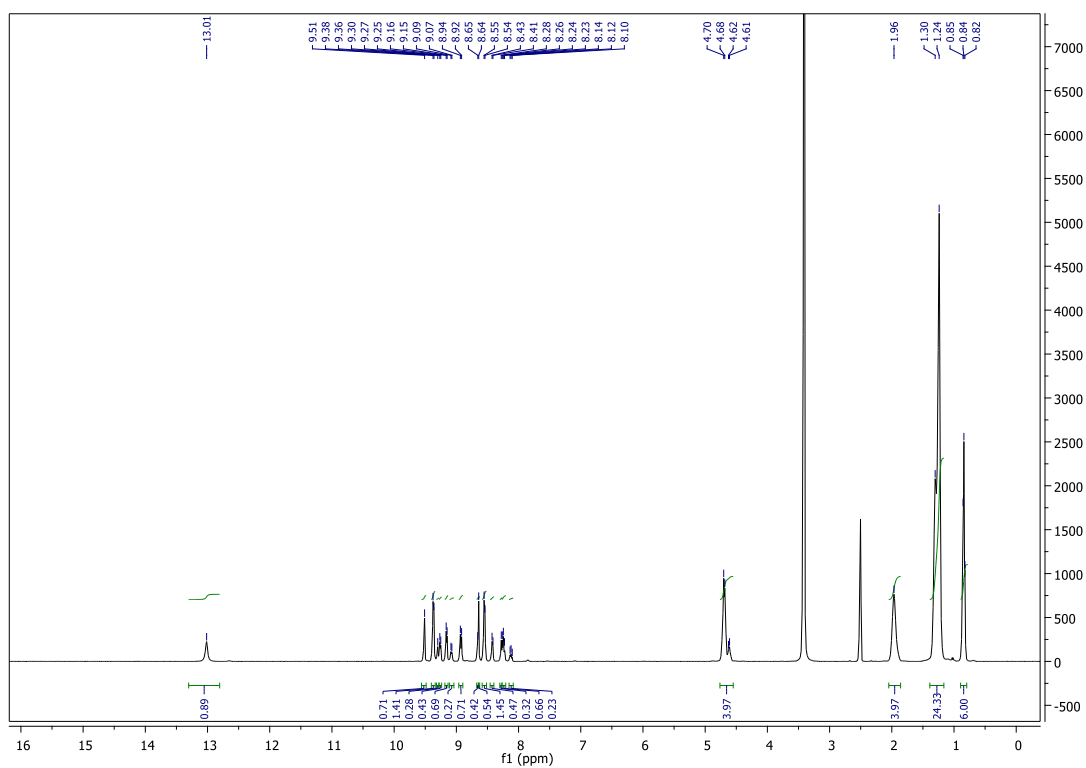

Figure S26.  $^1\text{H}$  NMR of Compound 19

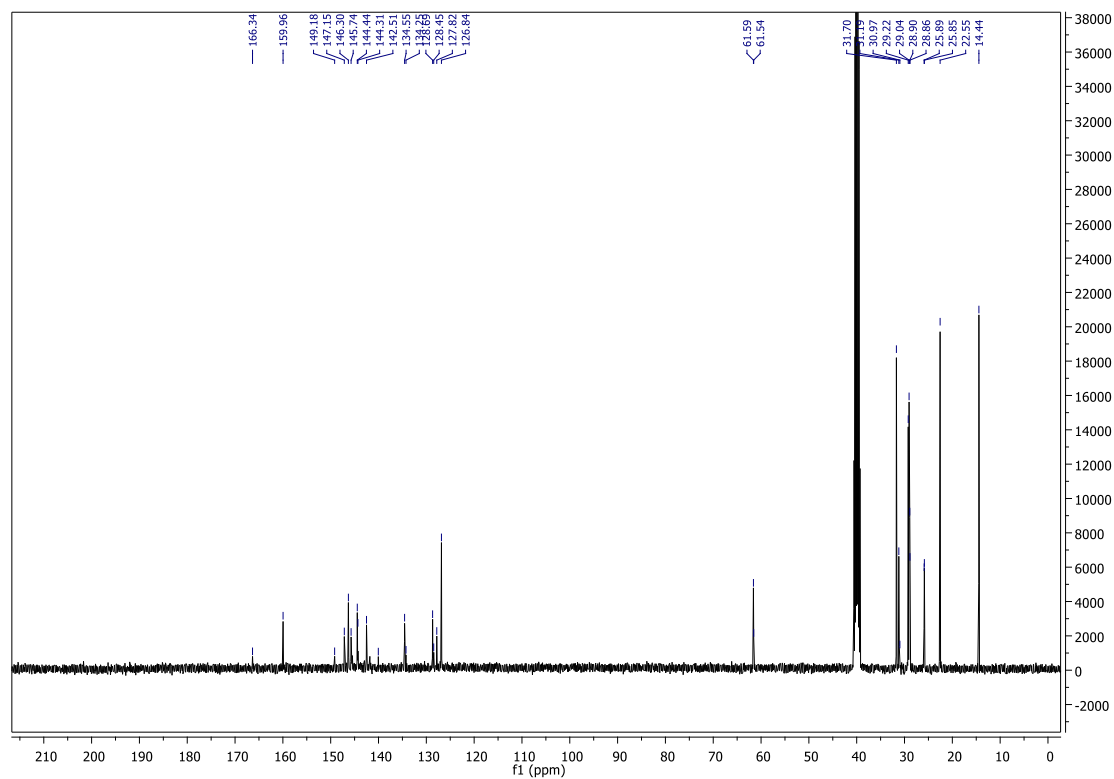

Figure S27. <sup>13</sup>C NMR of Compound 19

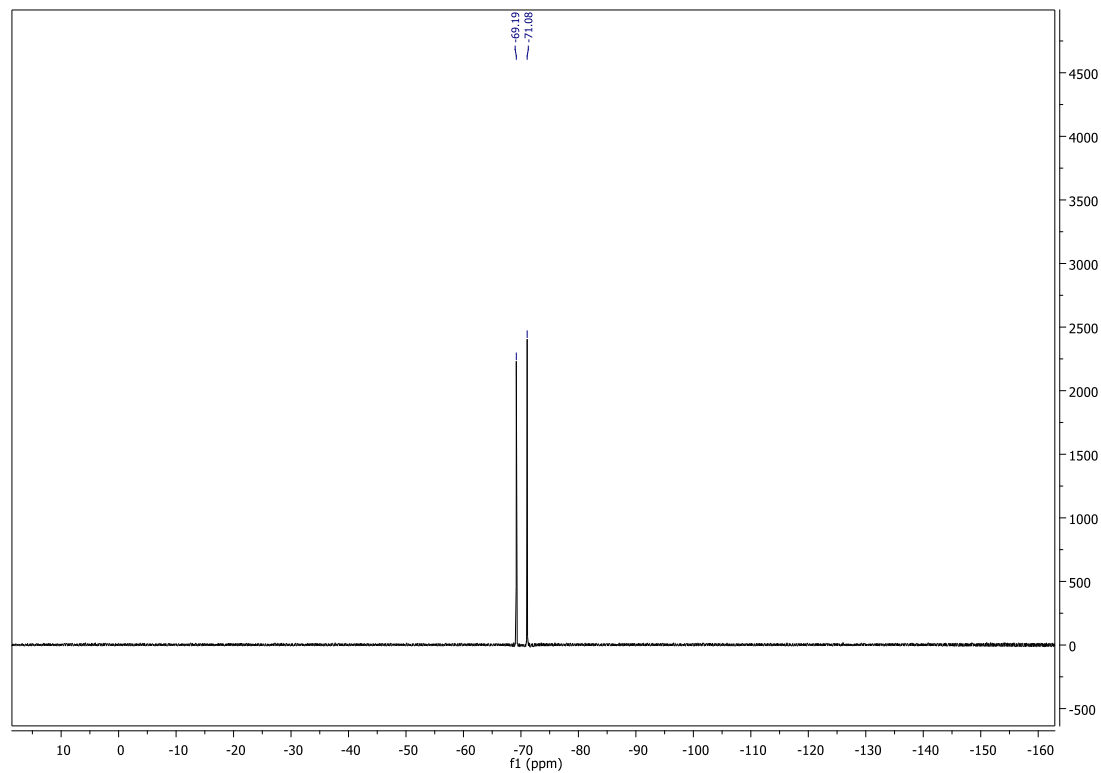

Figure S28. <sup>19</sup>F NMR of Compound 19

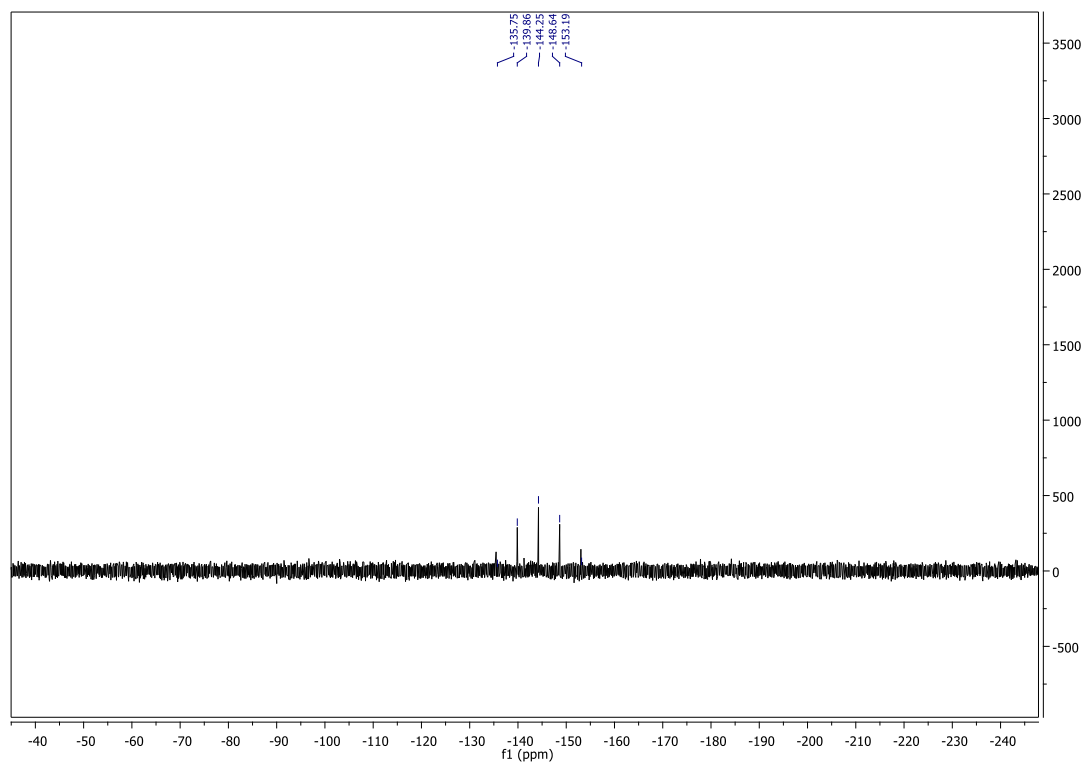

Figure S29.  $^{31}\text{P}$  NMR of Compound 19

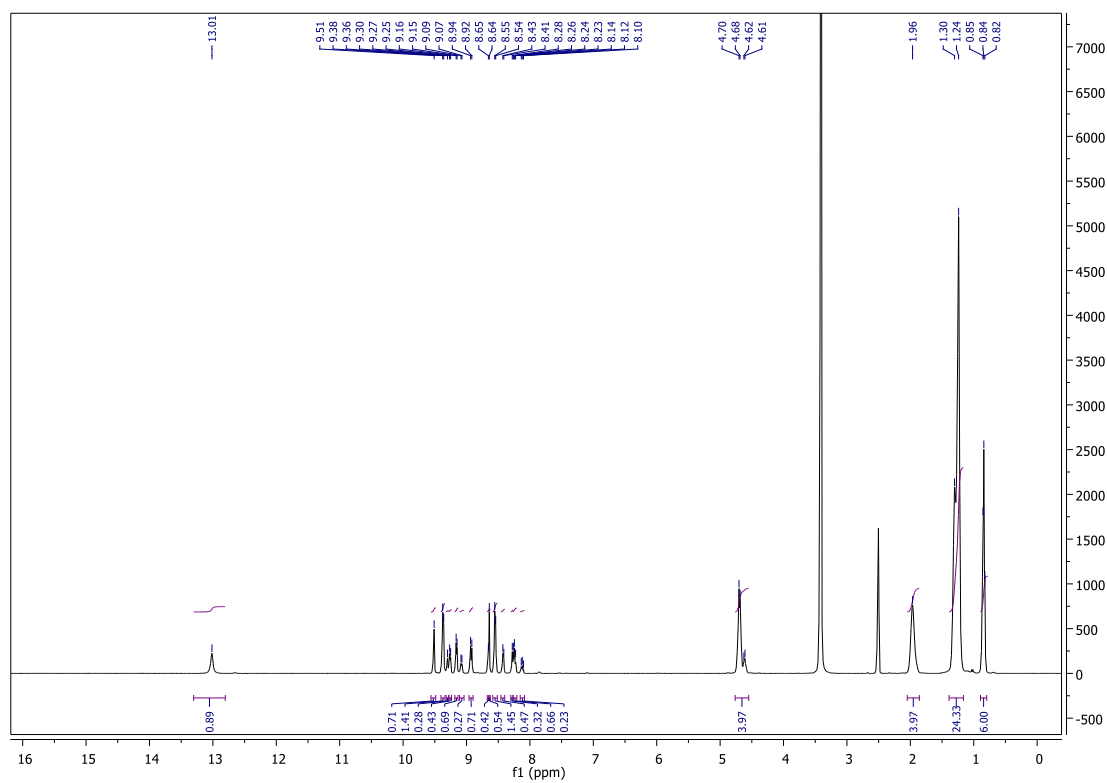

Figure S30.  $^1\text{H}$  NMR of Compound 20



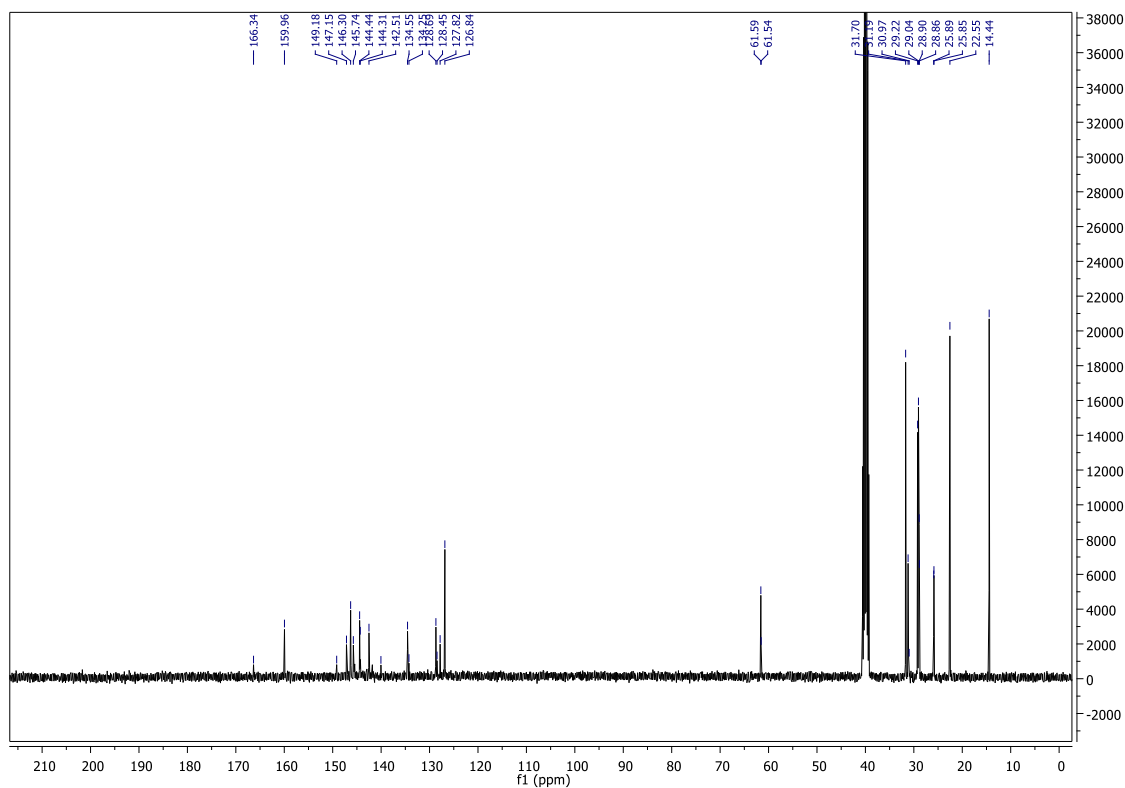

Figure S31. <sup>13</sup>C NMR of Compound 20

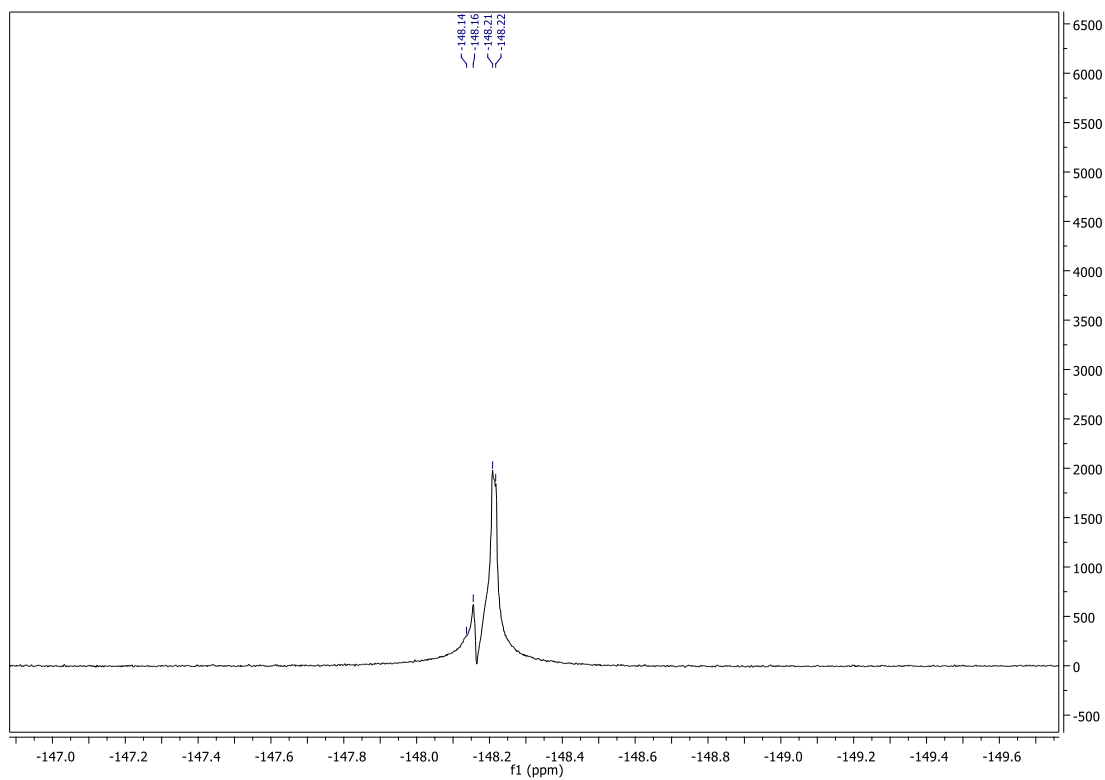

Figure S32. <sup>19</sup>F NMR of Compound 20

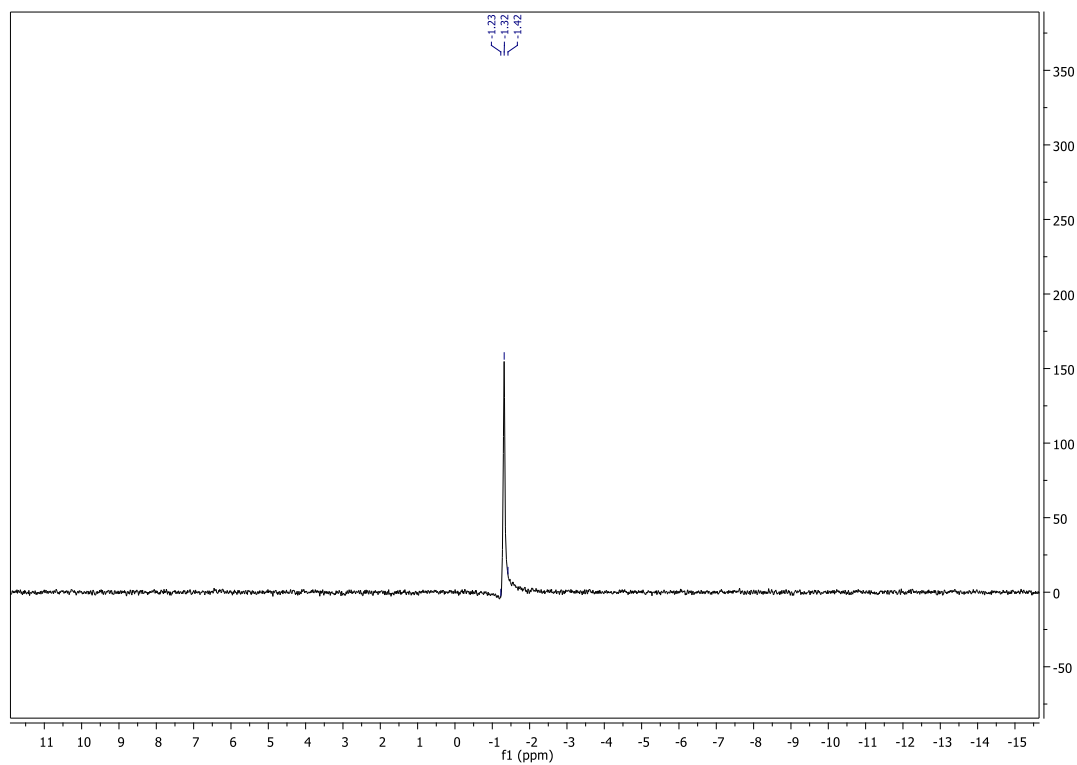

Figure S33.  $^{11}\text{B}$  NMR of Compound 20

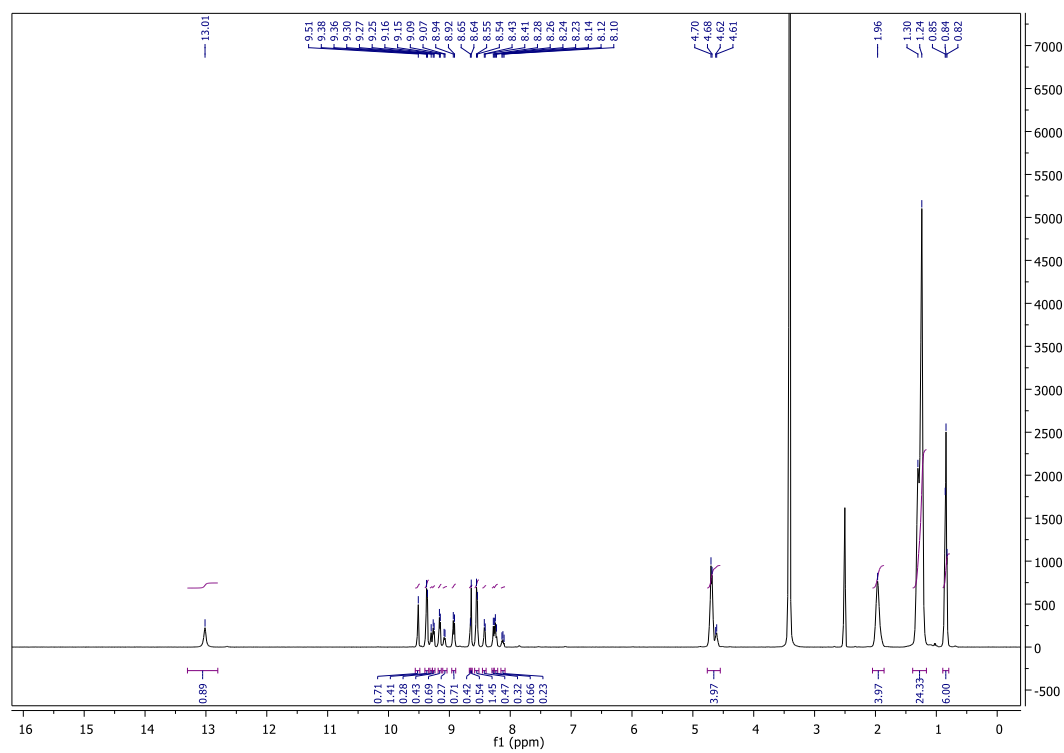

Figure S34.  $^1\text{H}$  NMR of Compound 21

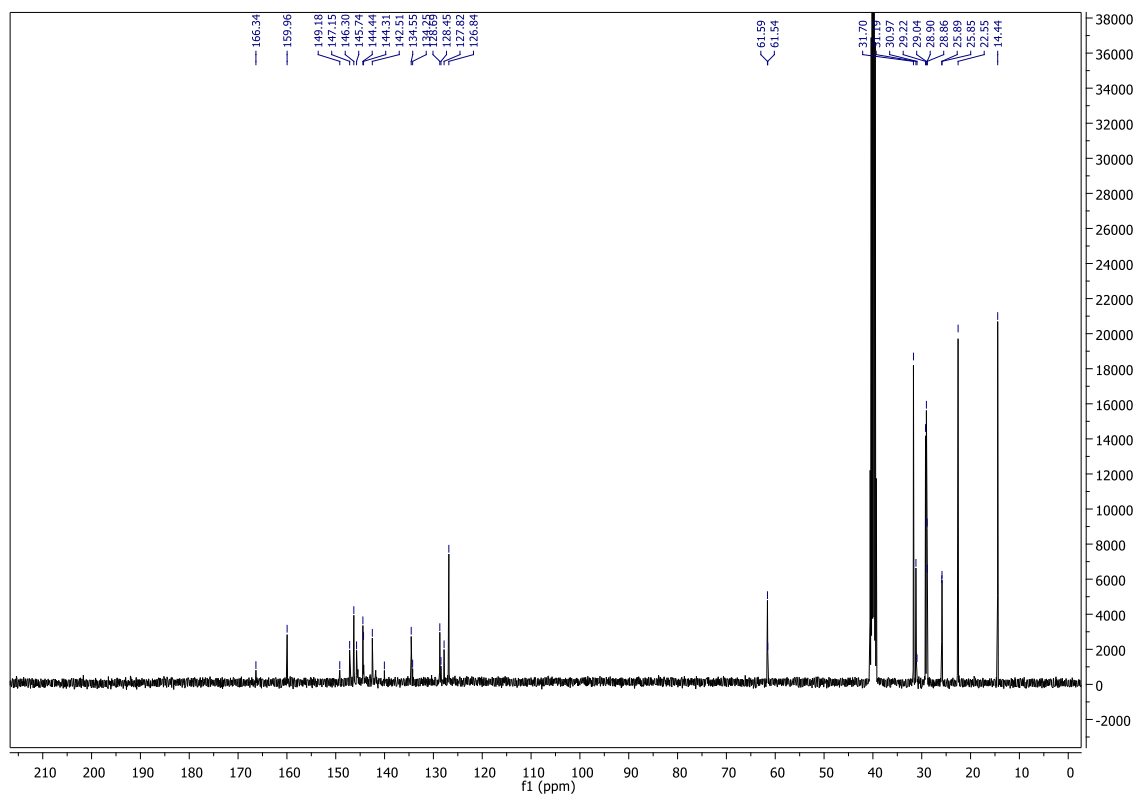

Figure S35. <sup>13</sup>C NMR of Compound 21

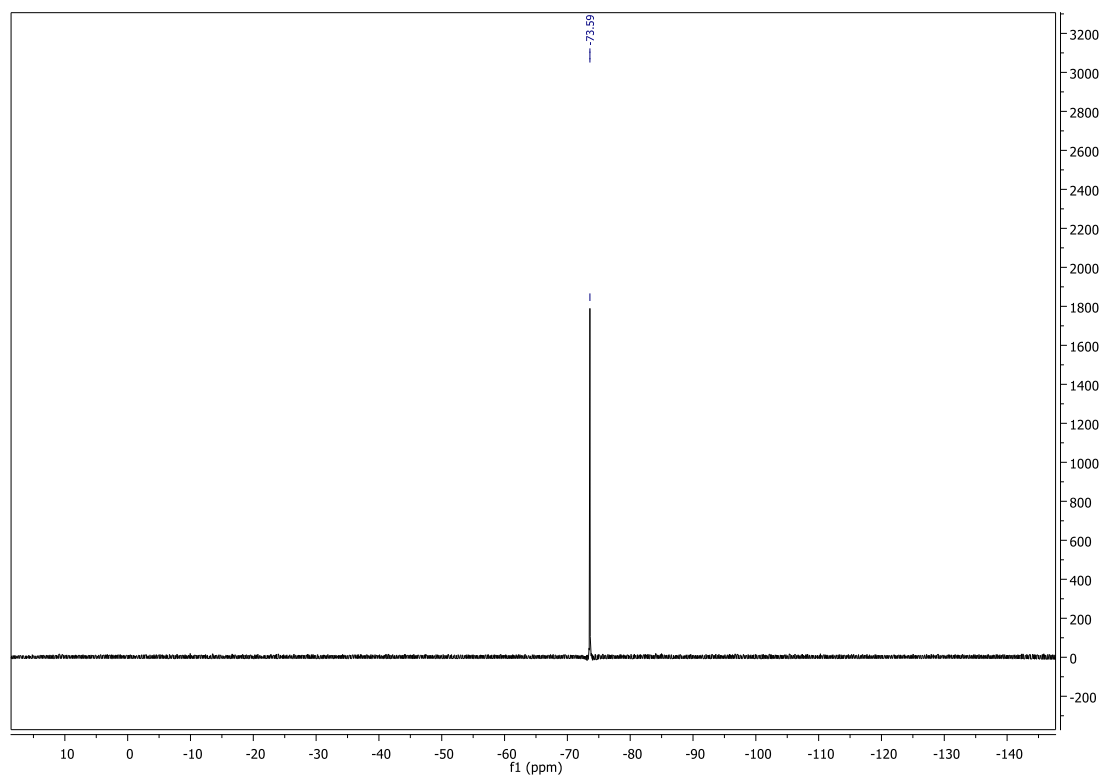

Figure S36. <sup>19</sup>F NMR of Compound 21

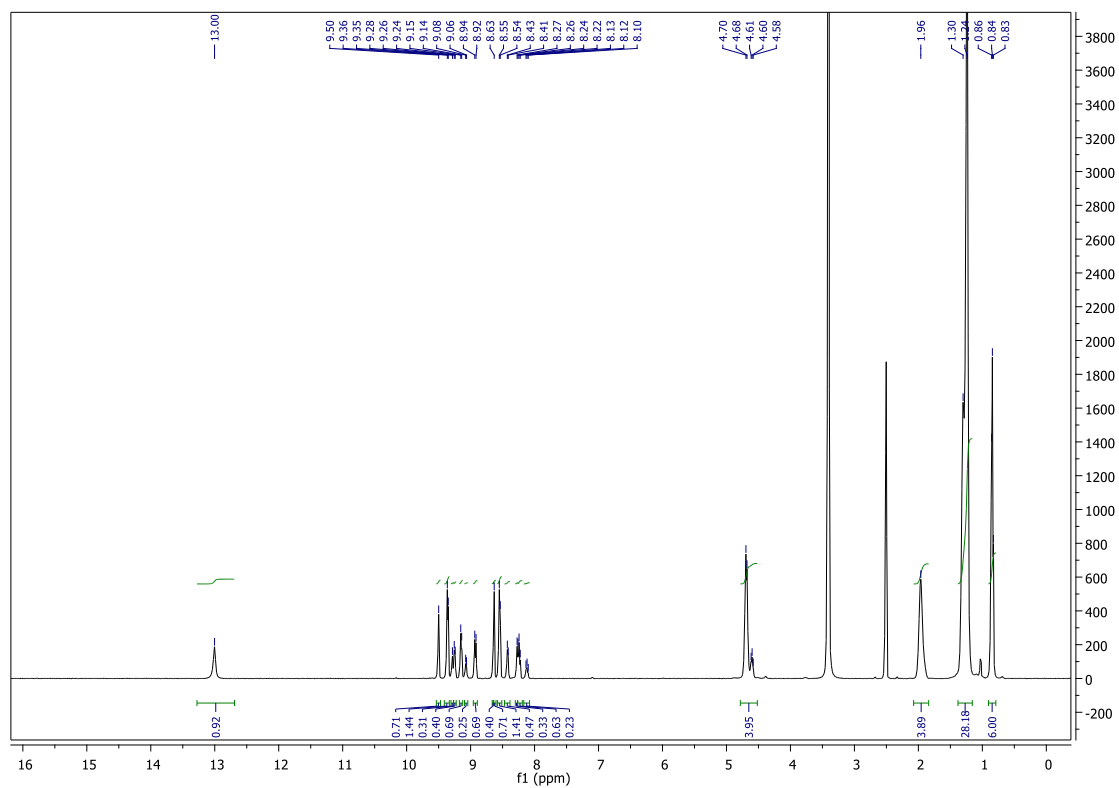

Figure S37. <sup>1</sup>H NMR of Compound 22

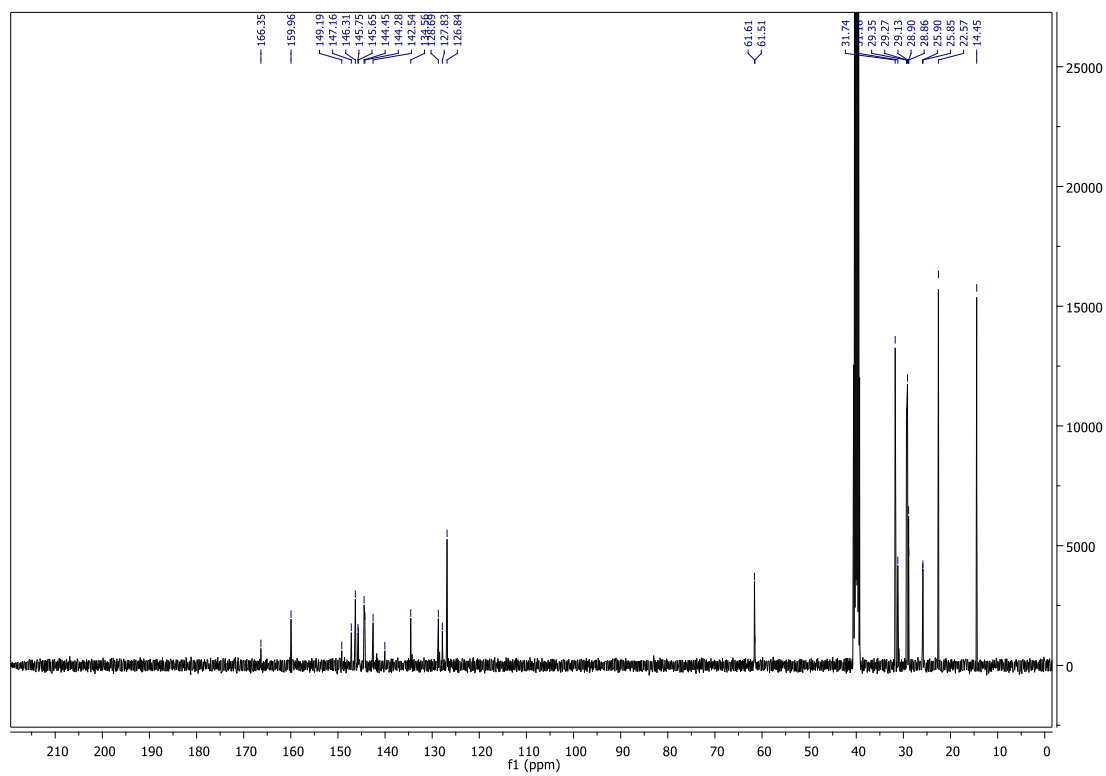

Figure S38. <sup>13</sup>C NMR of Compound 22

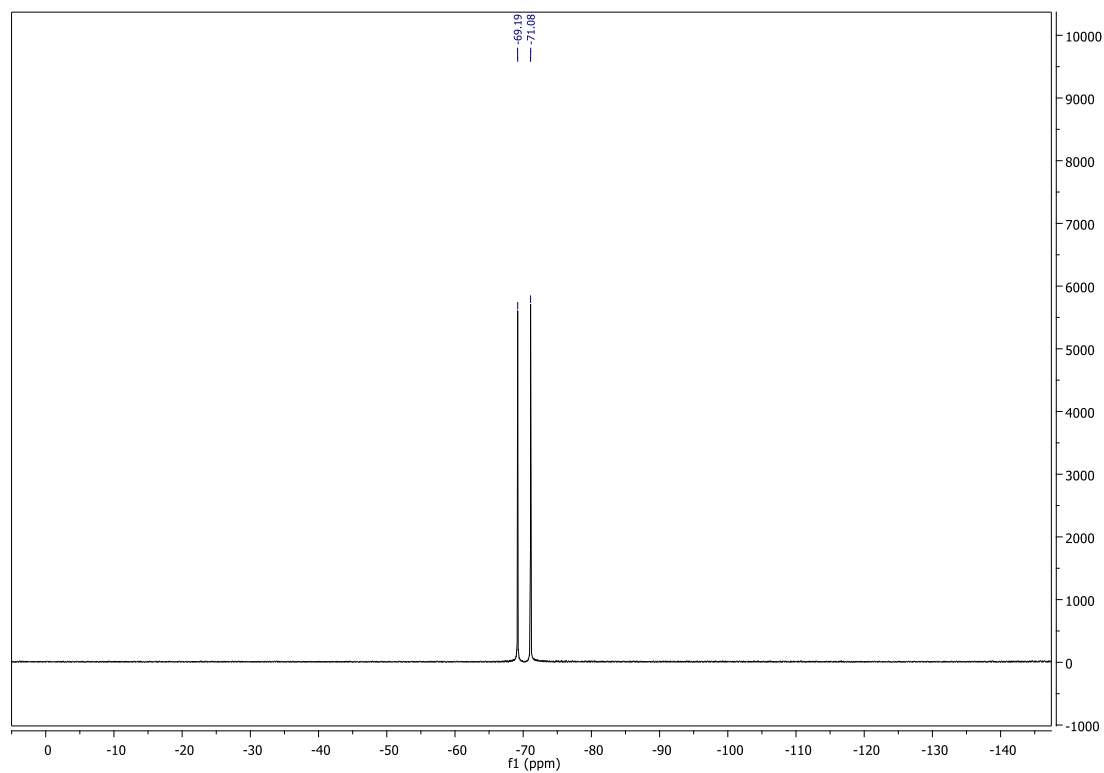

Figure S39.  $^{19}\text{F}$  NMR of Compound 22

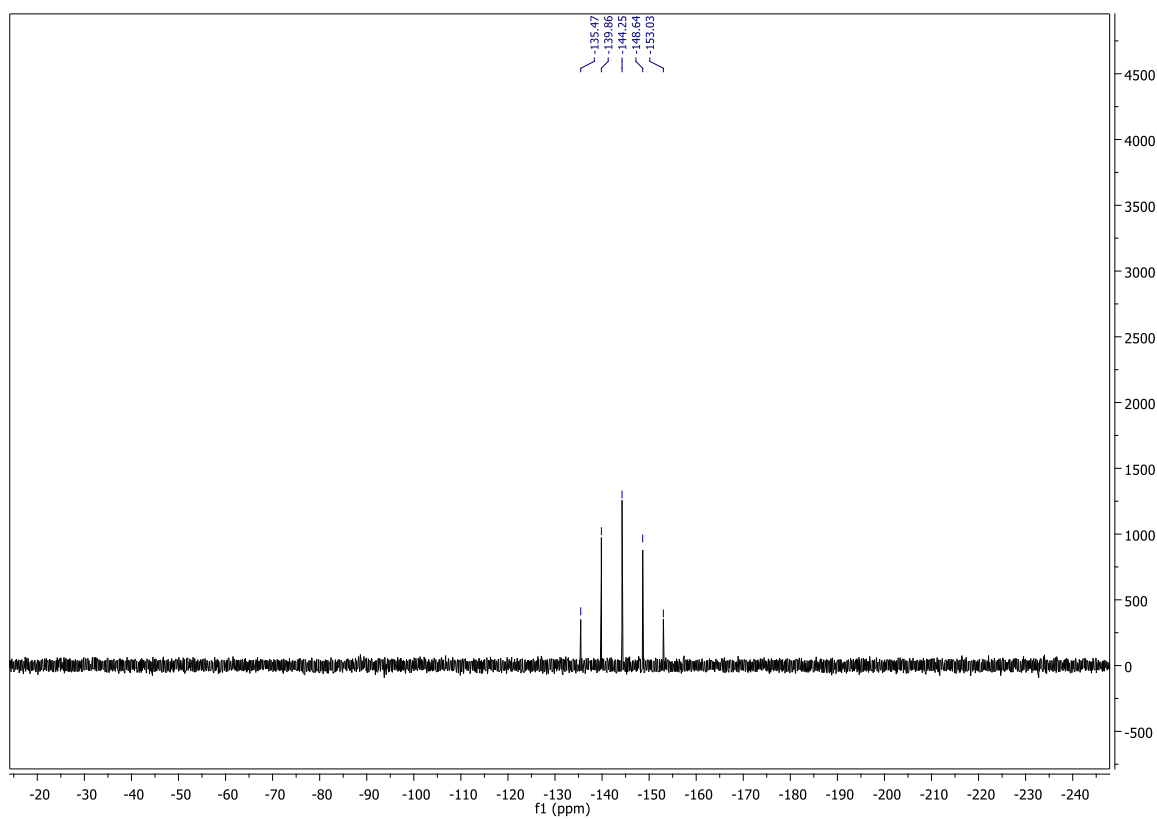

Figure S40.  $^{31}\text{P}$  NMR of Compound 22

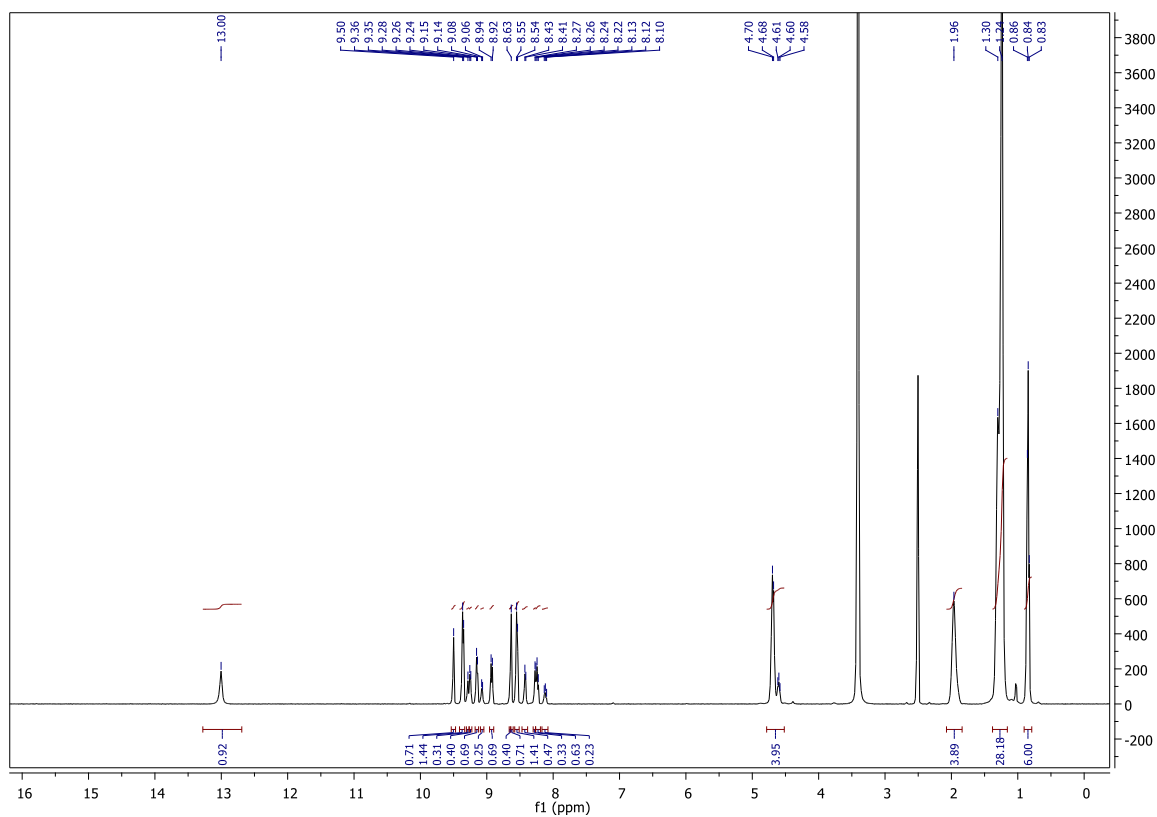

Figure S41.  $^1\text{H}$  NMR of Compound 23

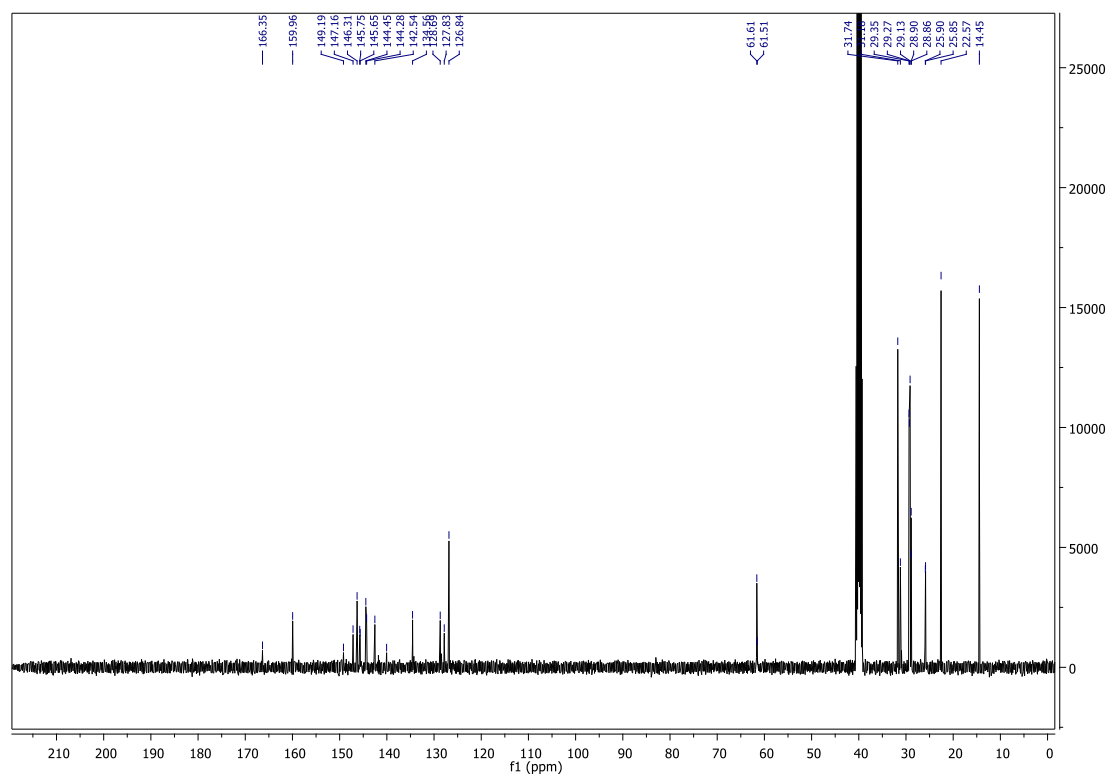

Figure S42.  $^{13}\text{C}$  NMR of Compound 23

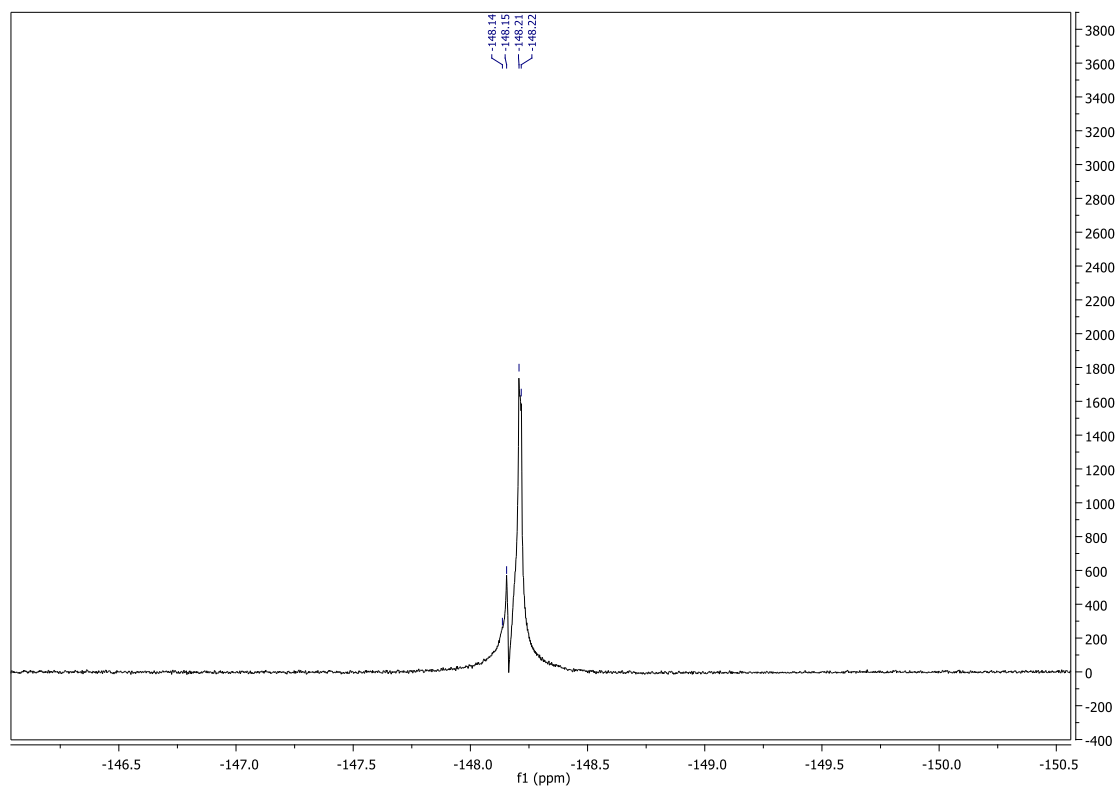

Figure S43.  $^{19}\text{F}$  NMR of Compound 23

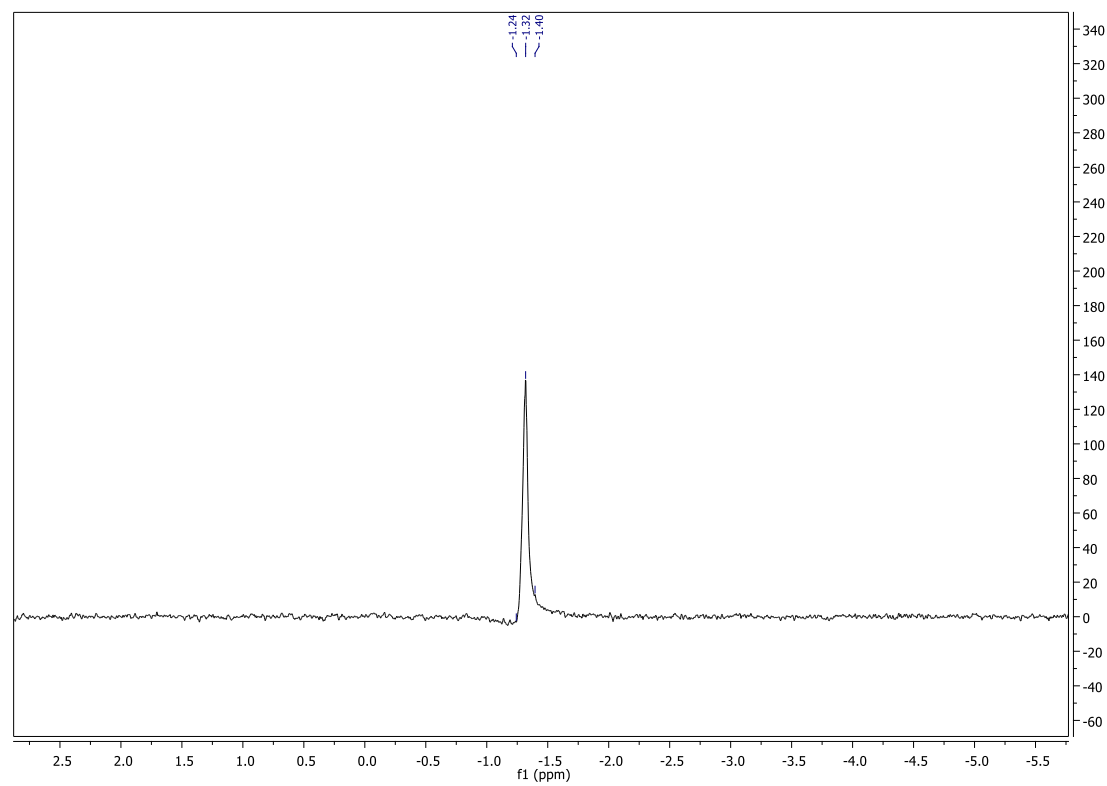

Figure S44.  $^{11}\text{B}$  NMR of Compound 23

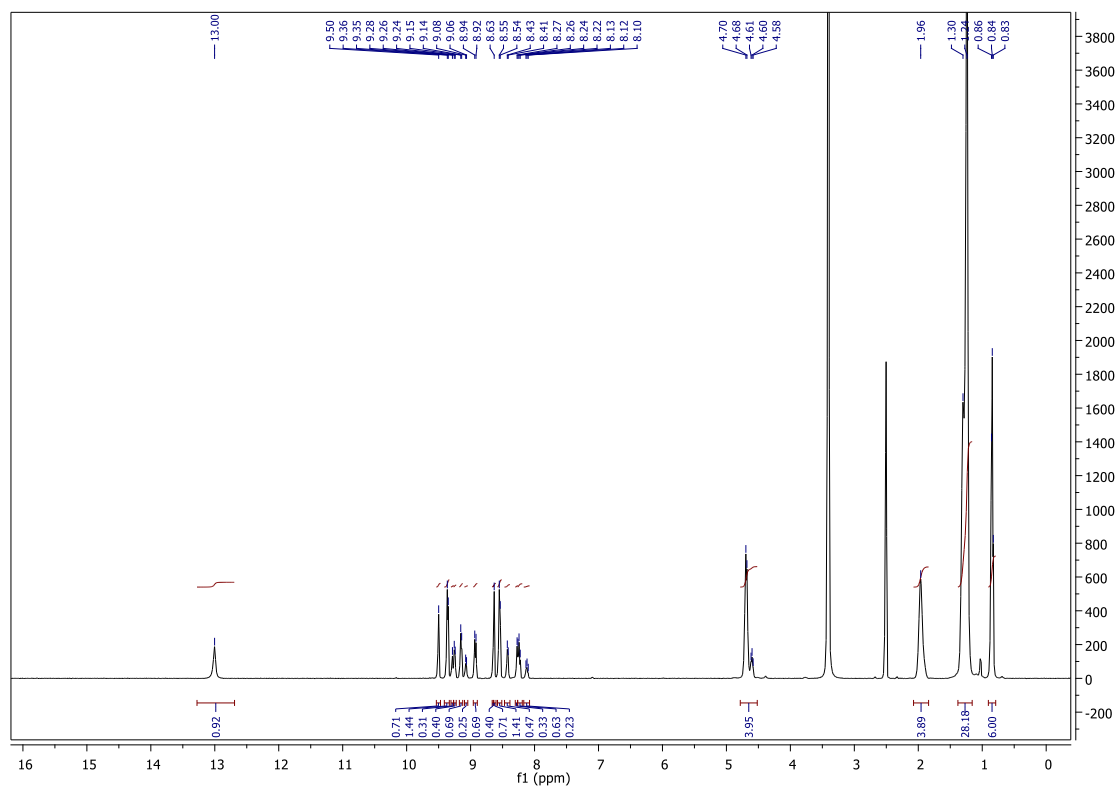

Figure S45. <sup>1</sup>H NMR of Compound 24

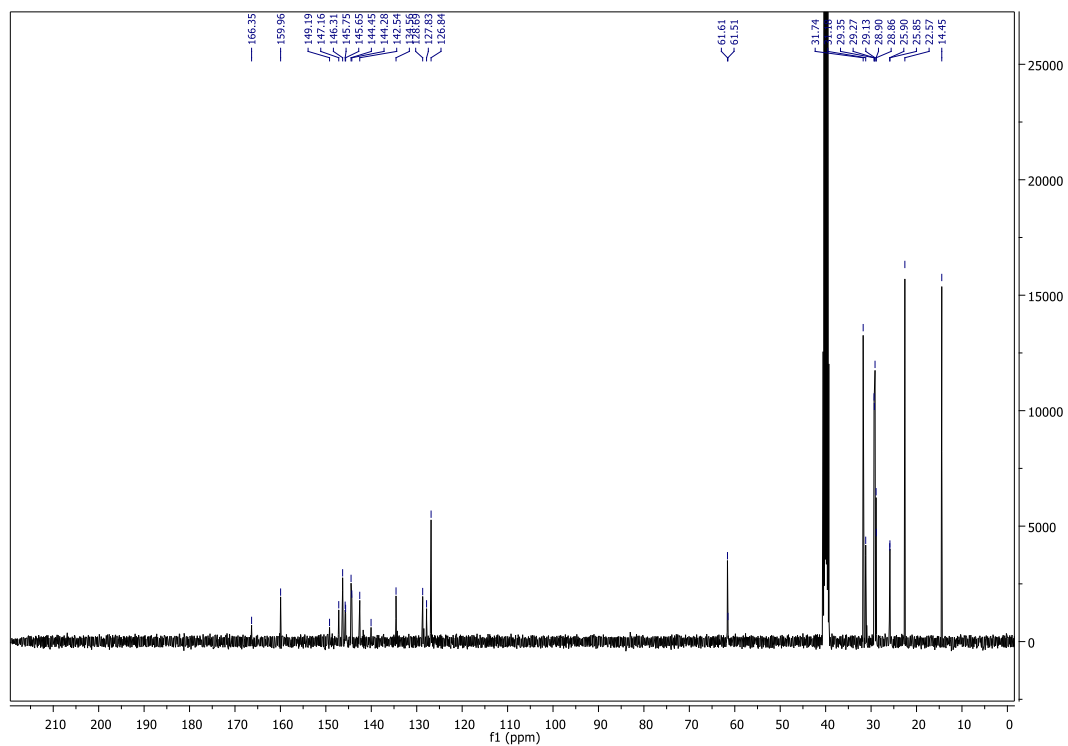

Figure S46. <sup>13</sup>C NMR of Compound 24



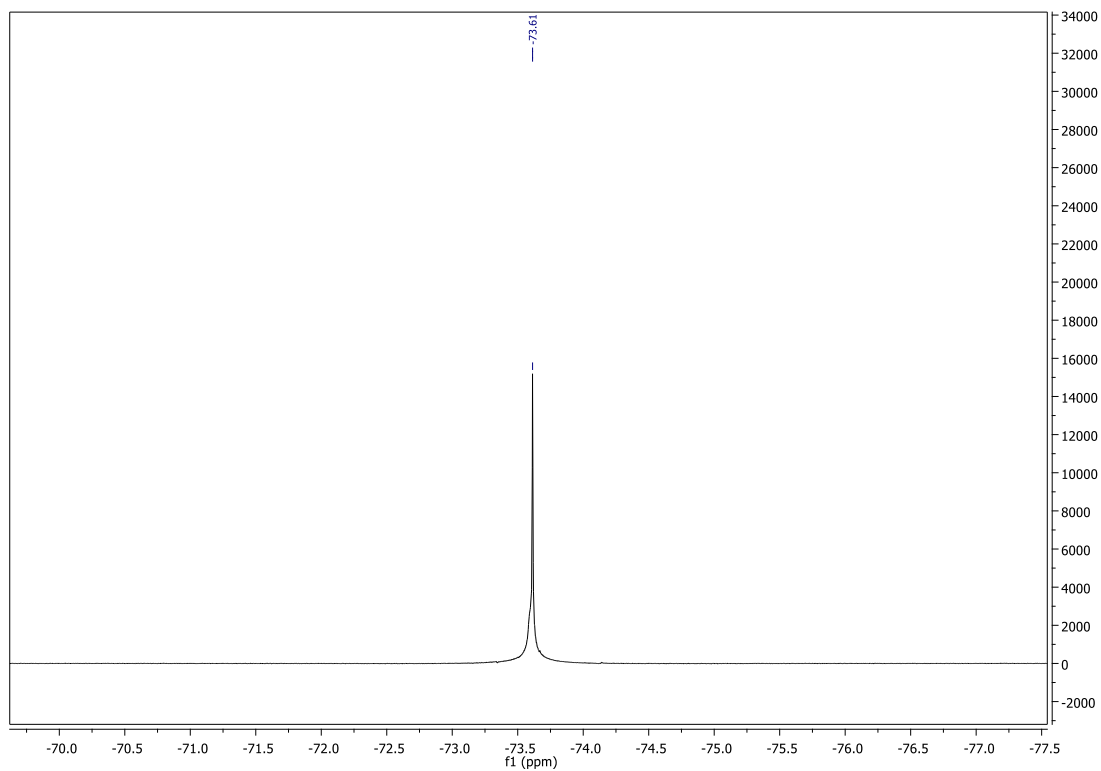

Figure S47.  $^{19}\text{F}$  NMR of Compound 24

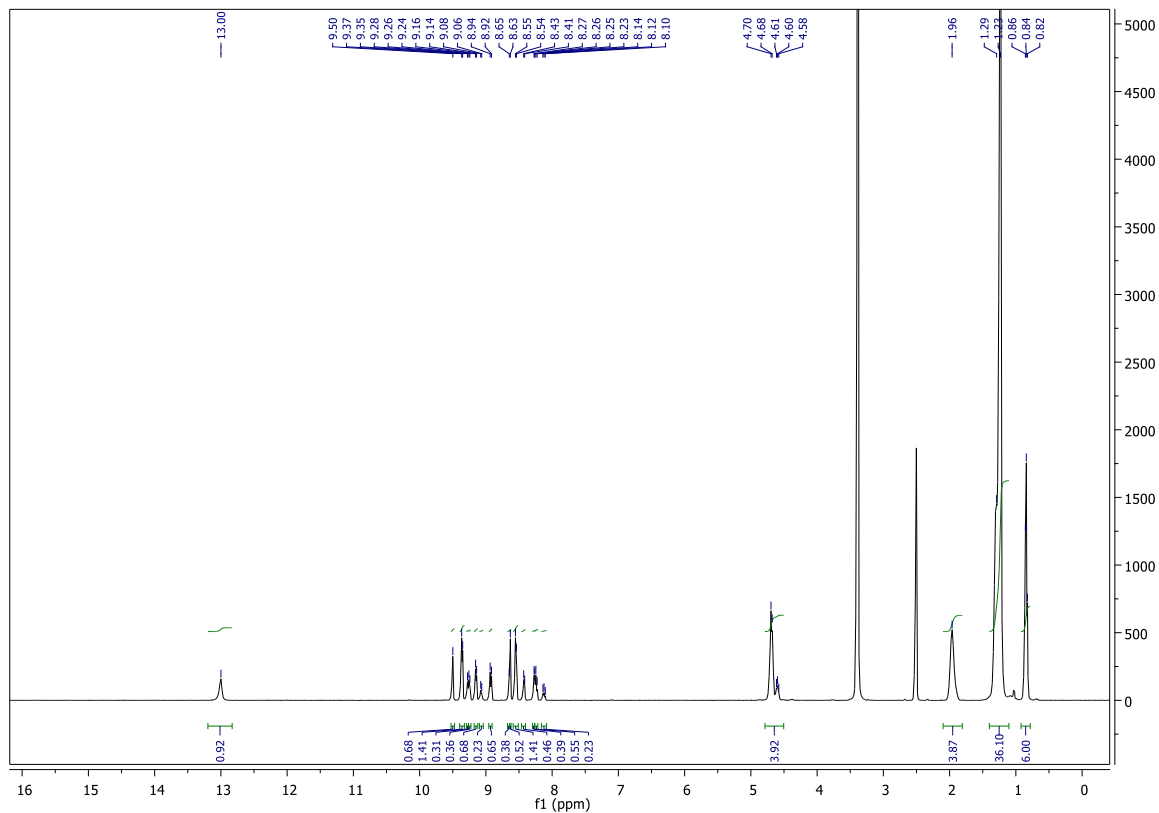

Figure S48.  $^1\text{H}$  NMR of Compound 25

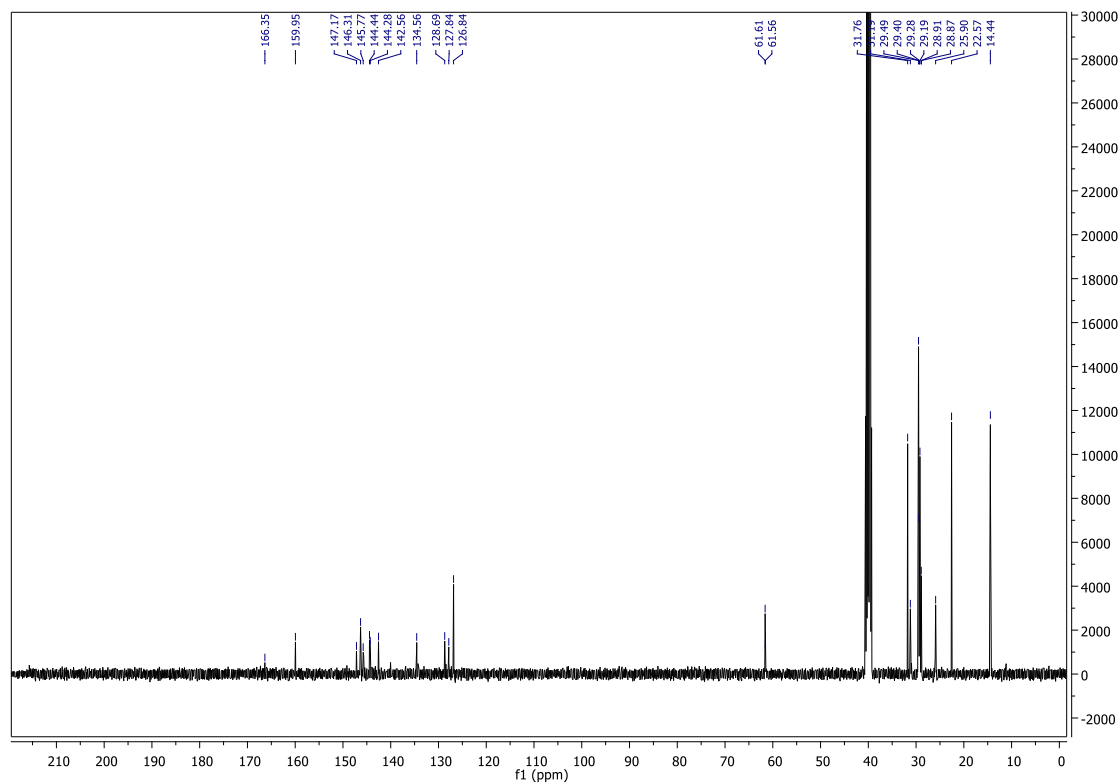

Figure S49. <sup>13</sup>C NMR of Compound 25

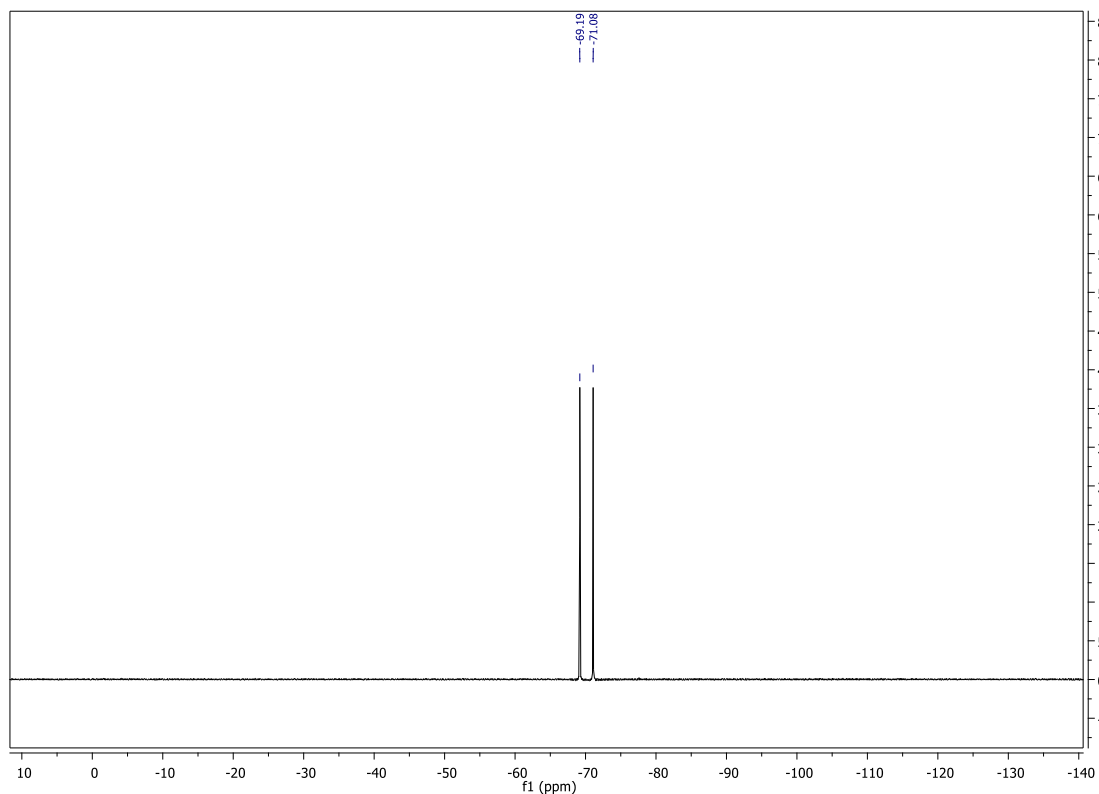

Figure S50. <sup>19</sup>F NMR of Compound 25

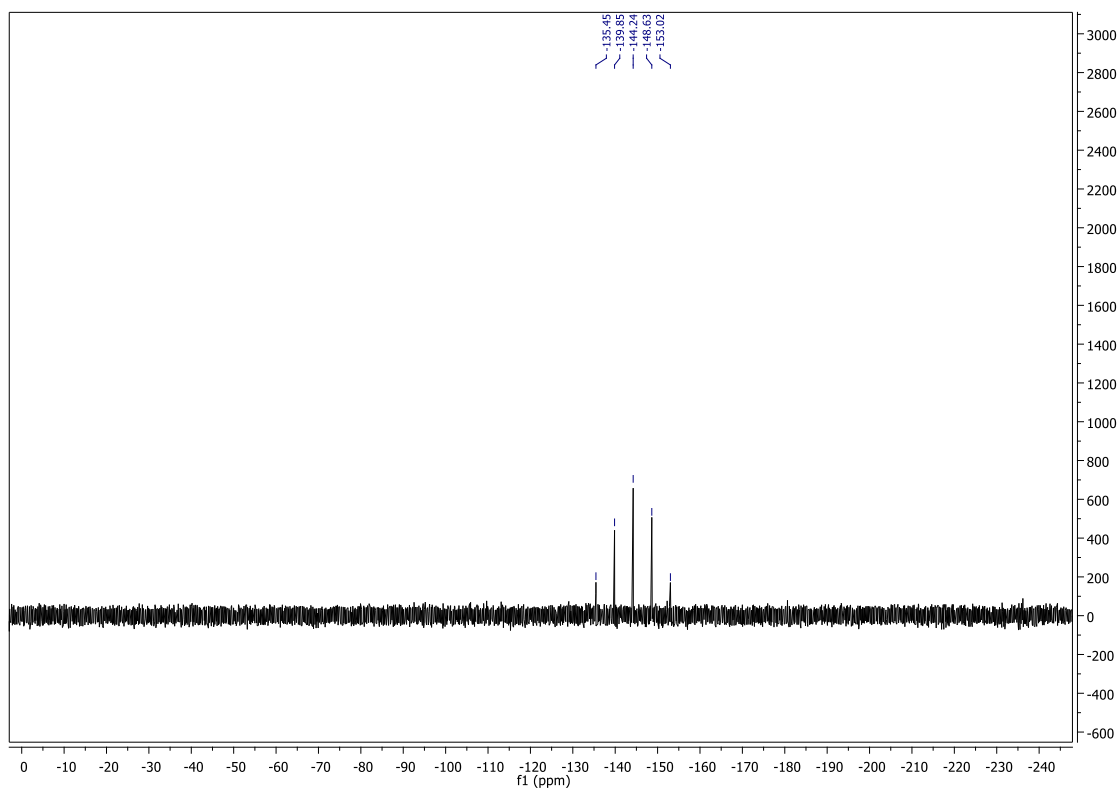

Figure S51. <sup>31</sup>P NMR of Compound 25

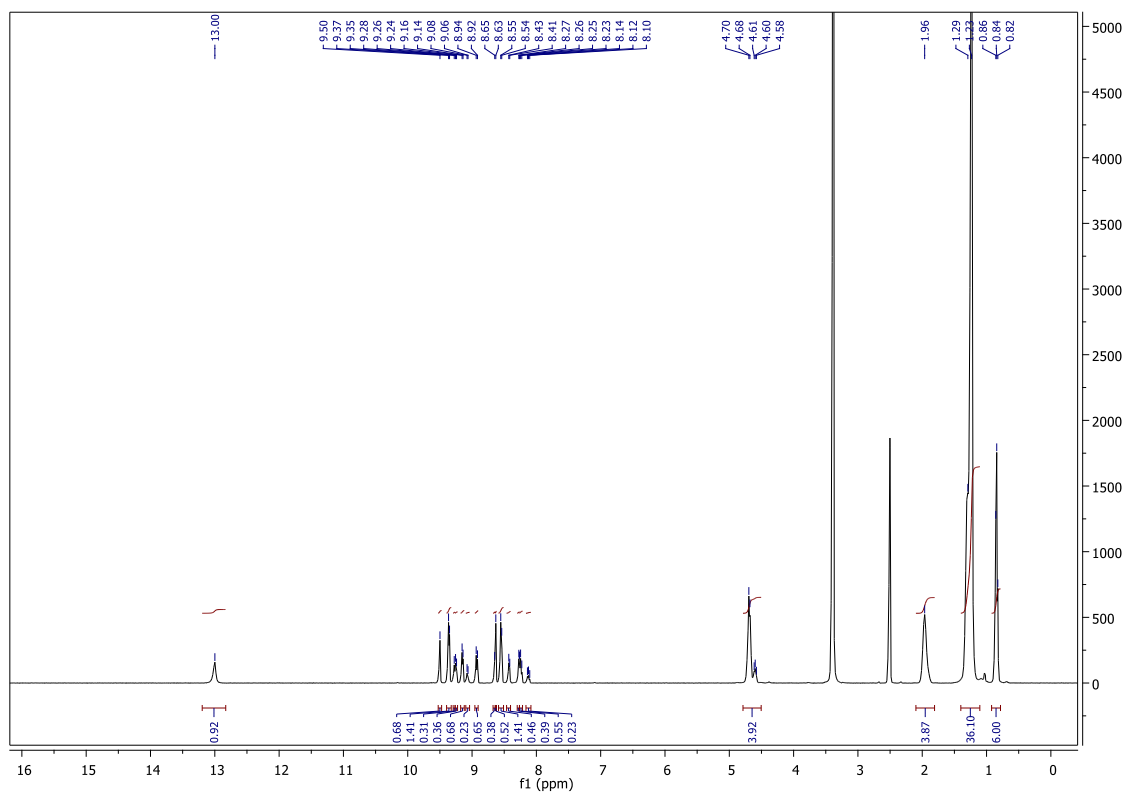

Figure S52. <sup>1</sup>H NMR of Compound 26

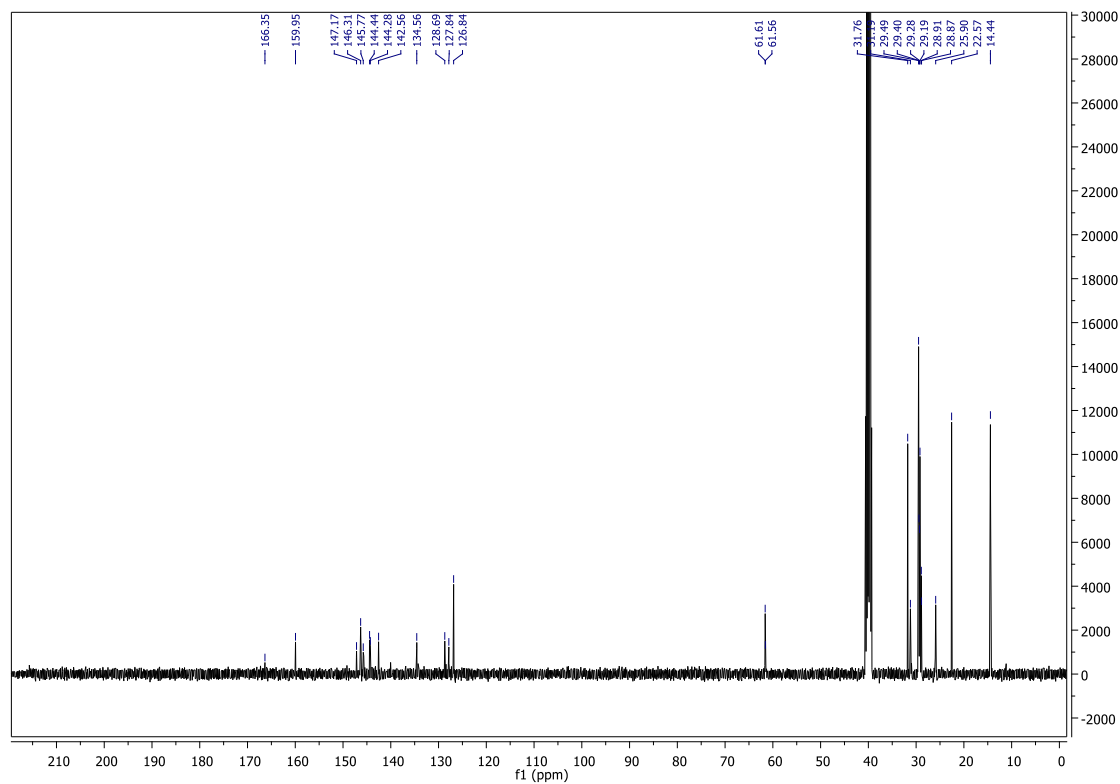

Figure S53.  $^{13}\text{C}$  NMR of Compound 26

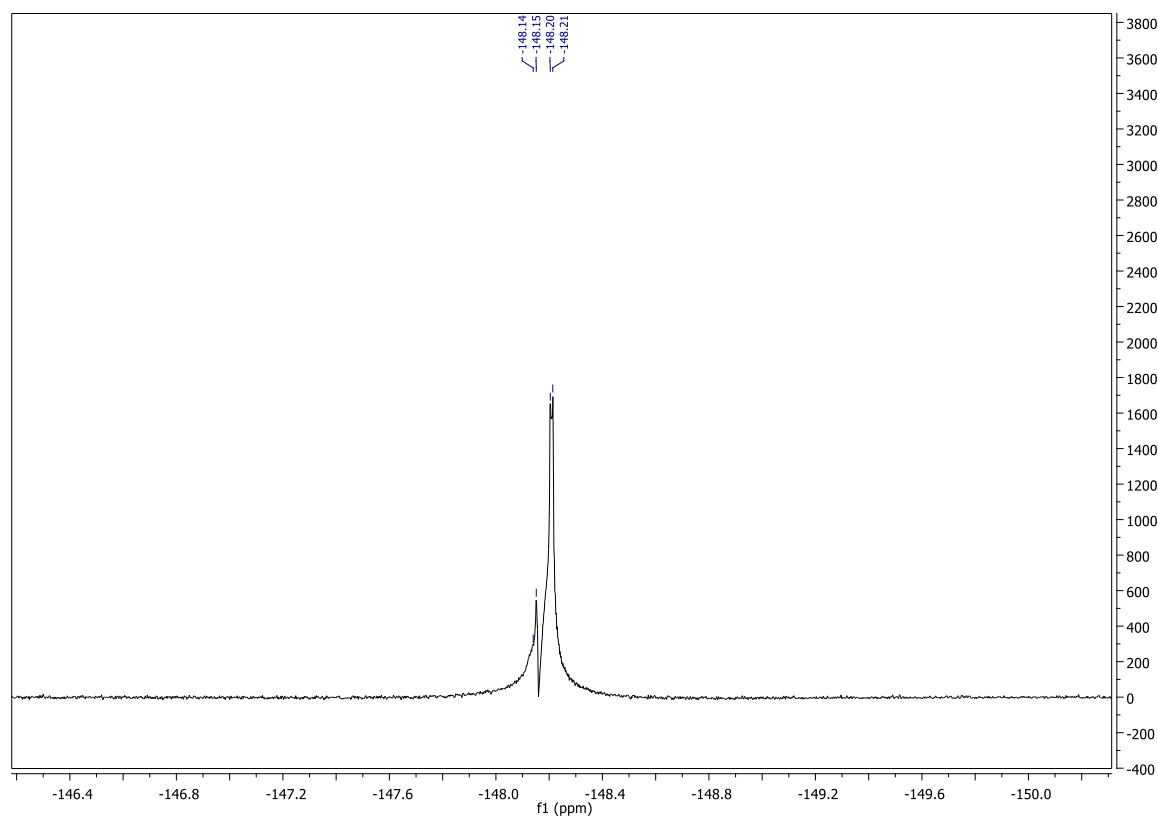

Figure S54.  $^{19}\text{F}$  NMR of Compound 26

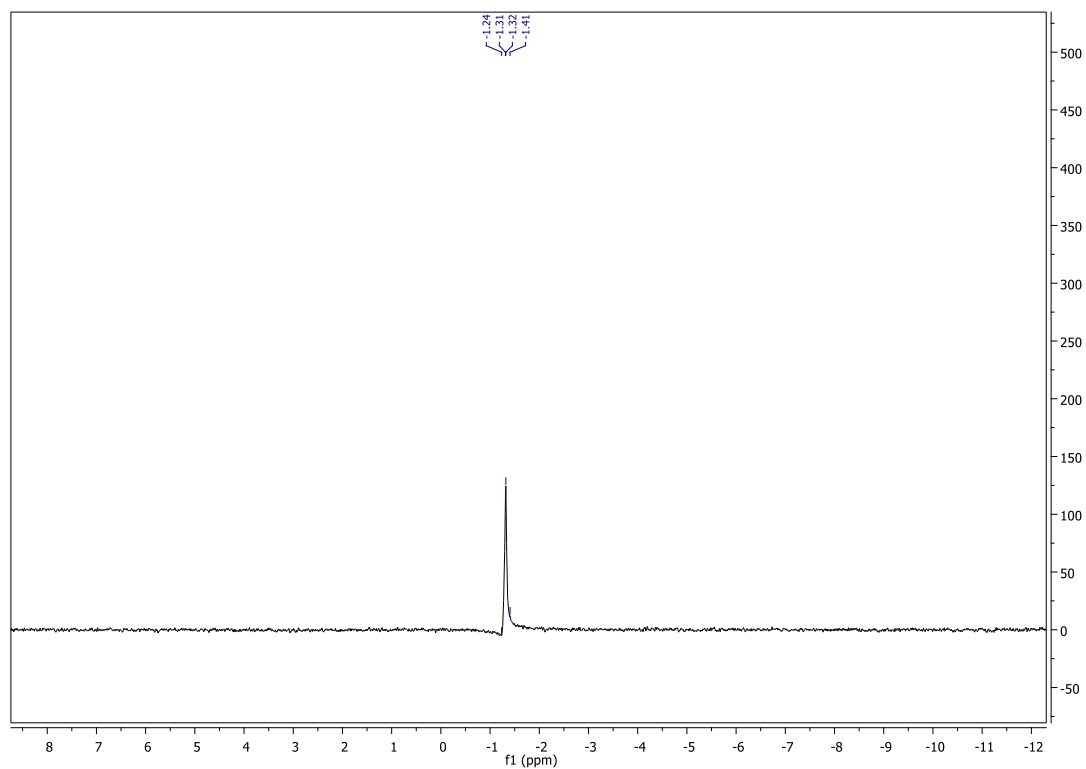

Figure S55.  $^{11}\text{B}$  NMR of Compound 26

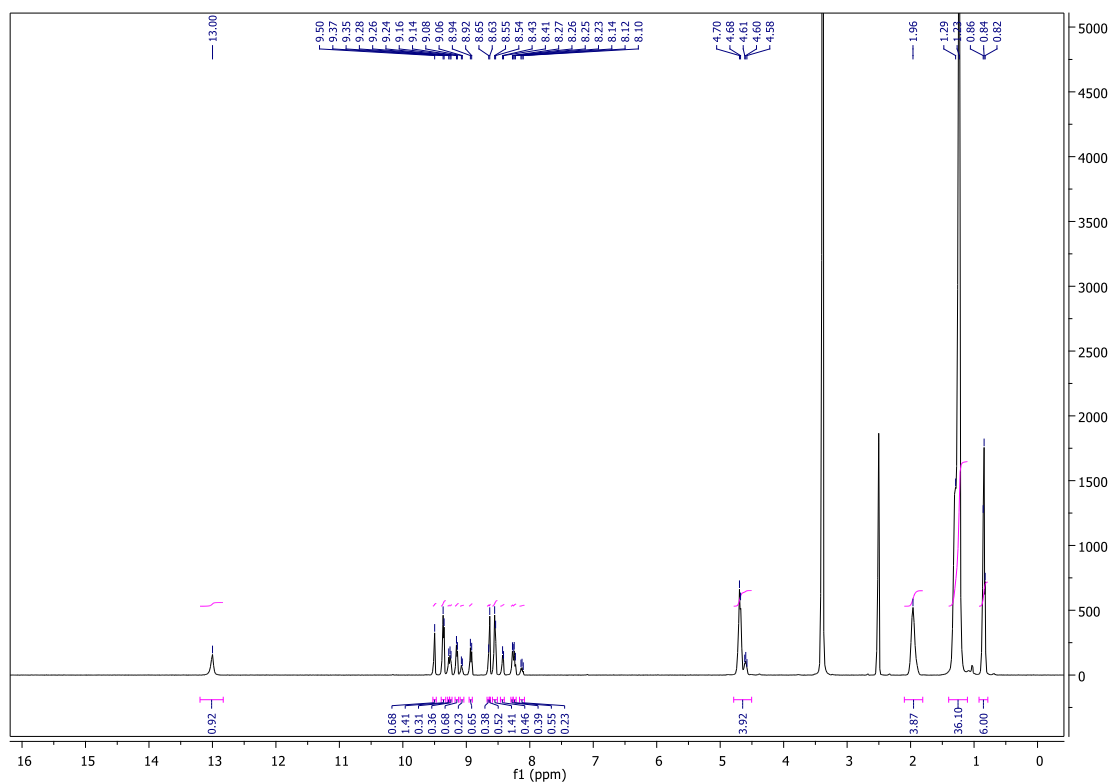

Figure S56.  $^1\text{H}$  NMR of Compound 27

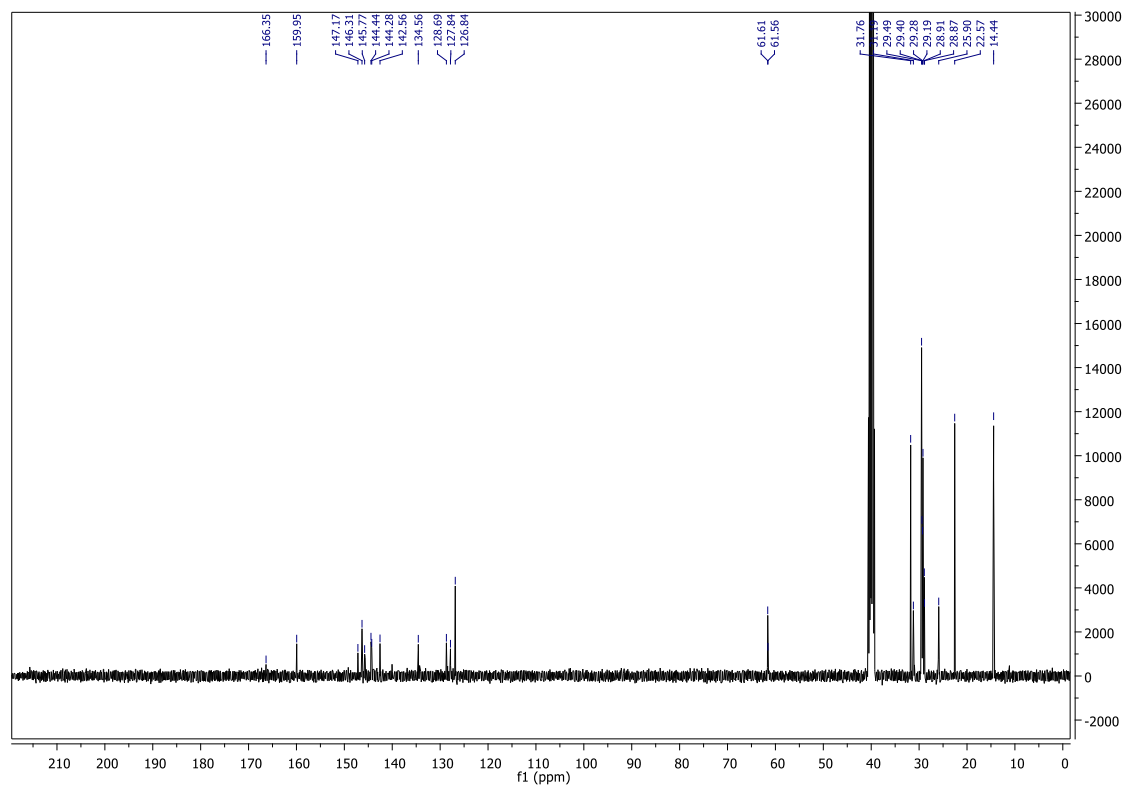

Figure S57. <sup>13</sup>C NMR of Compound 27

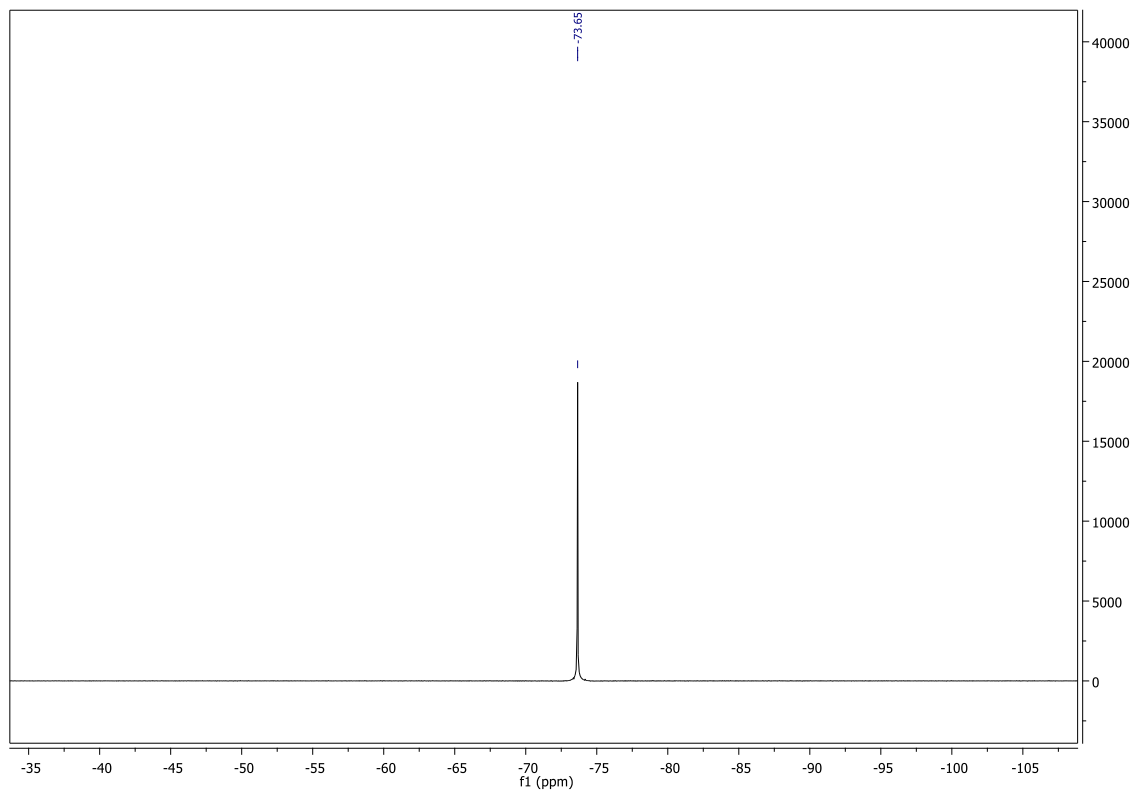

Figure S58. <sup>19</sup>F NMR of Compound 27

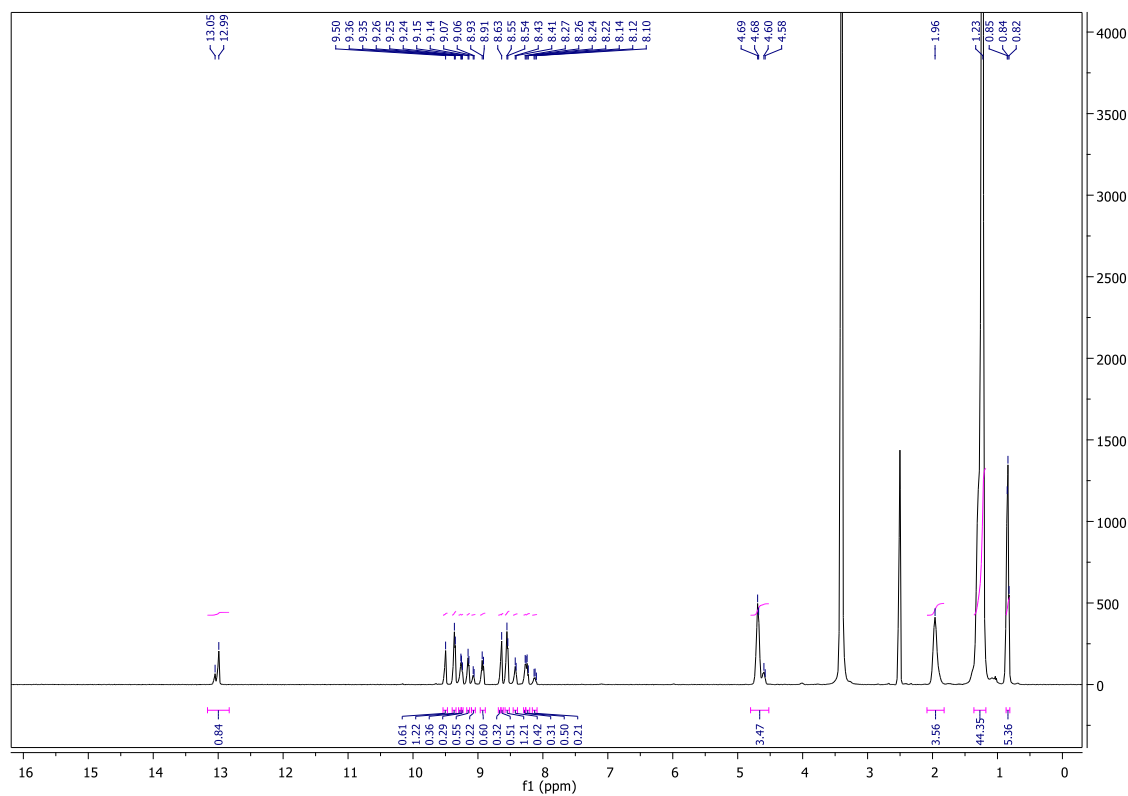

Figure S59.  $^1\text{H}$  NMR of Compound 28

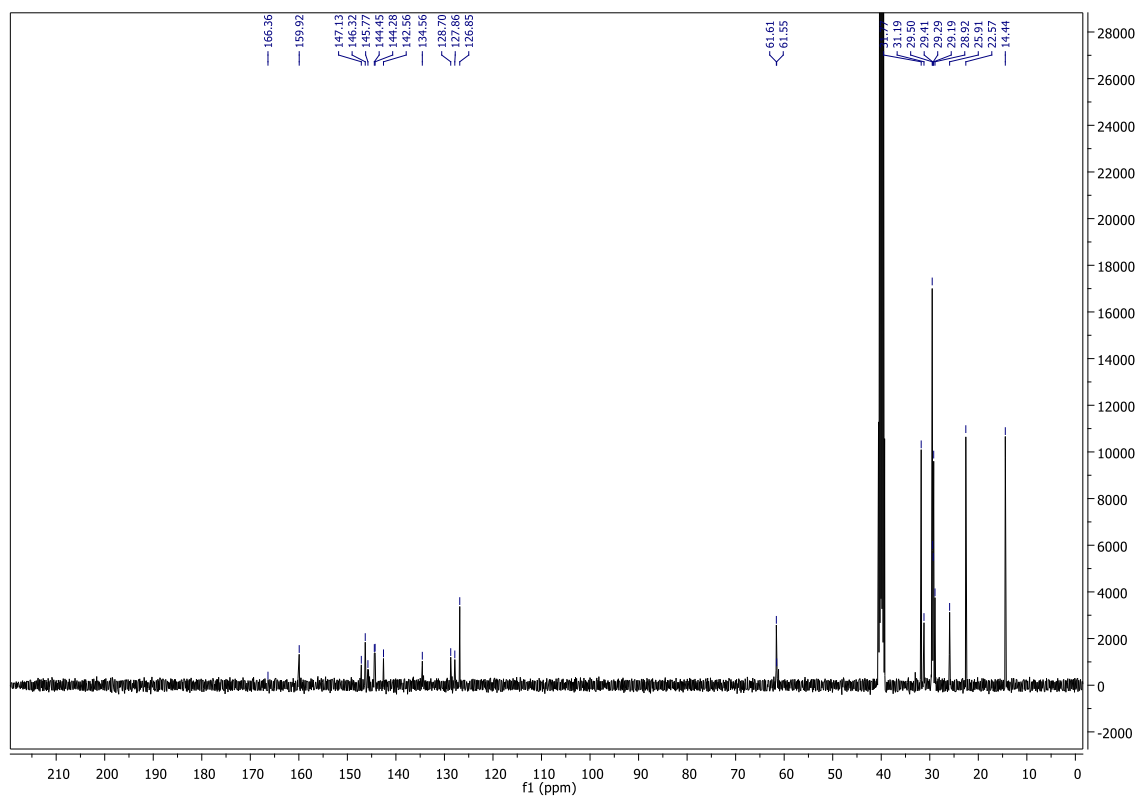

Figure S60.  $^{13}\text{C}$  NMR of Compound 28

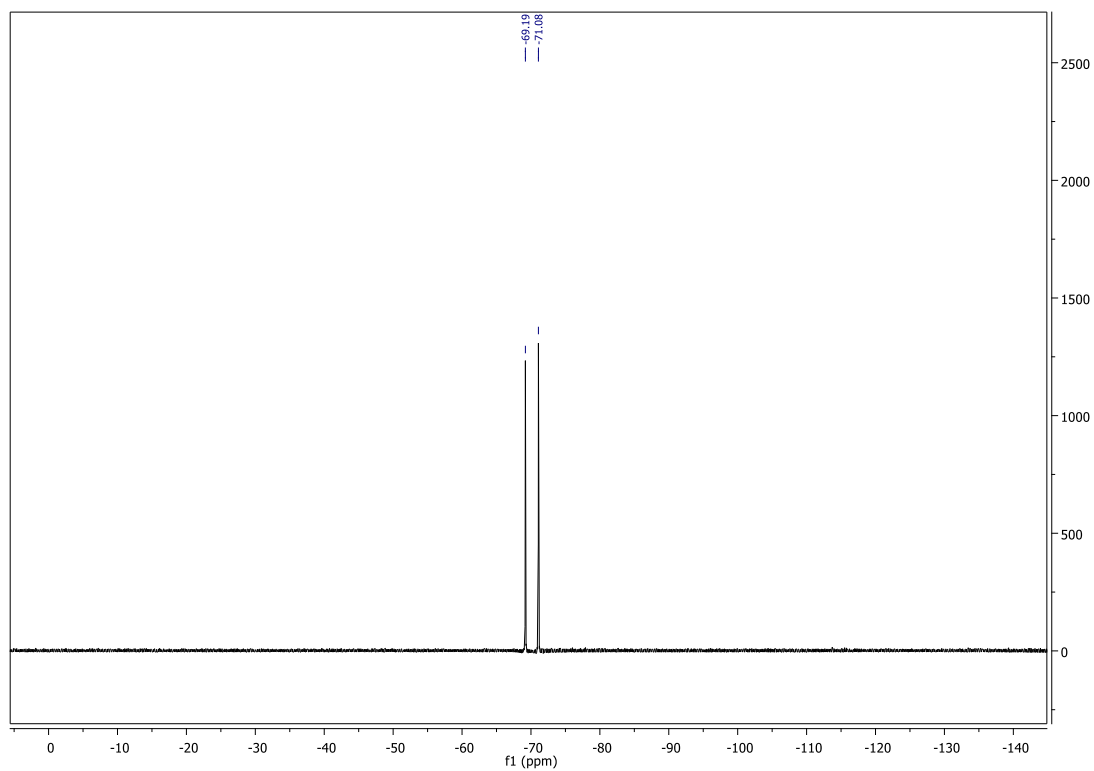

Figure S61.  $^{19}\text{F}$  NMR of Compound 28

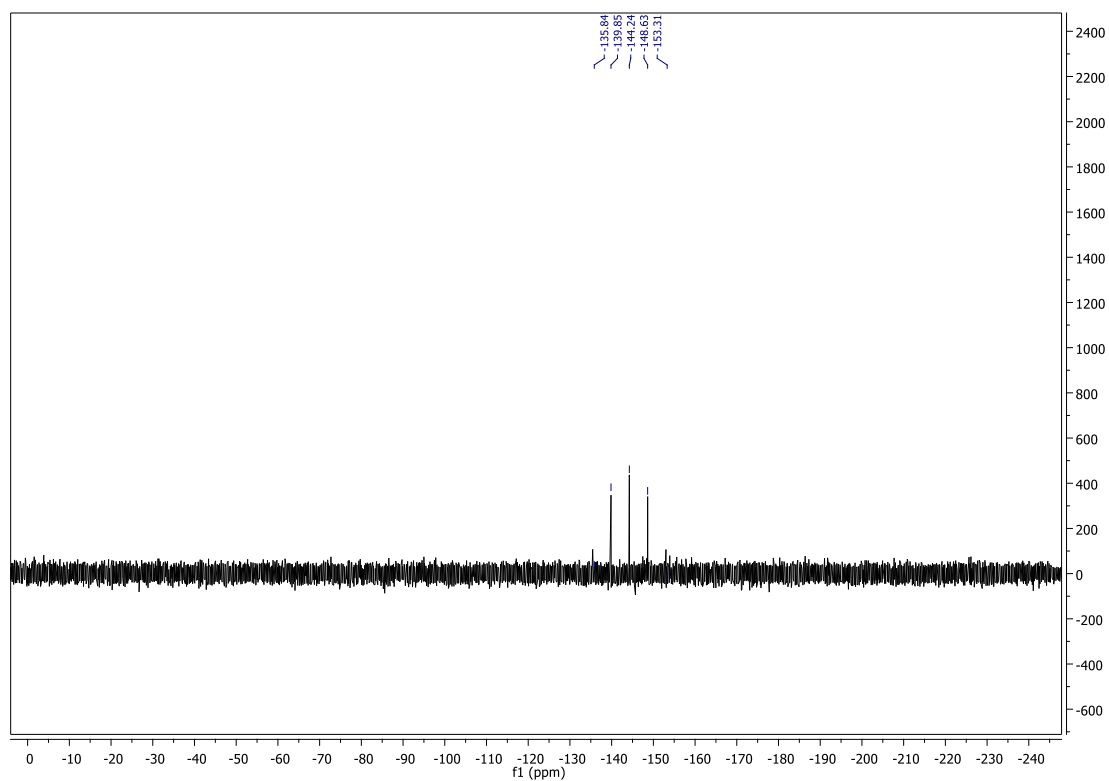

Figure S62.  $^{31}\text{P}$  NMR of Compound 28



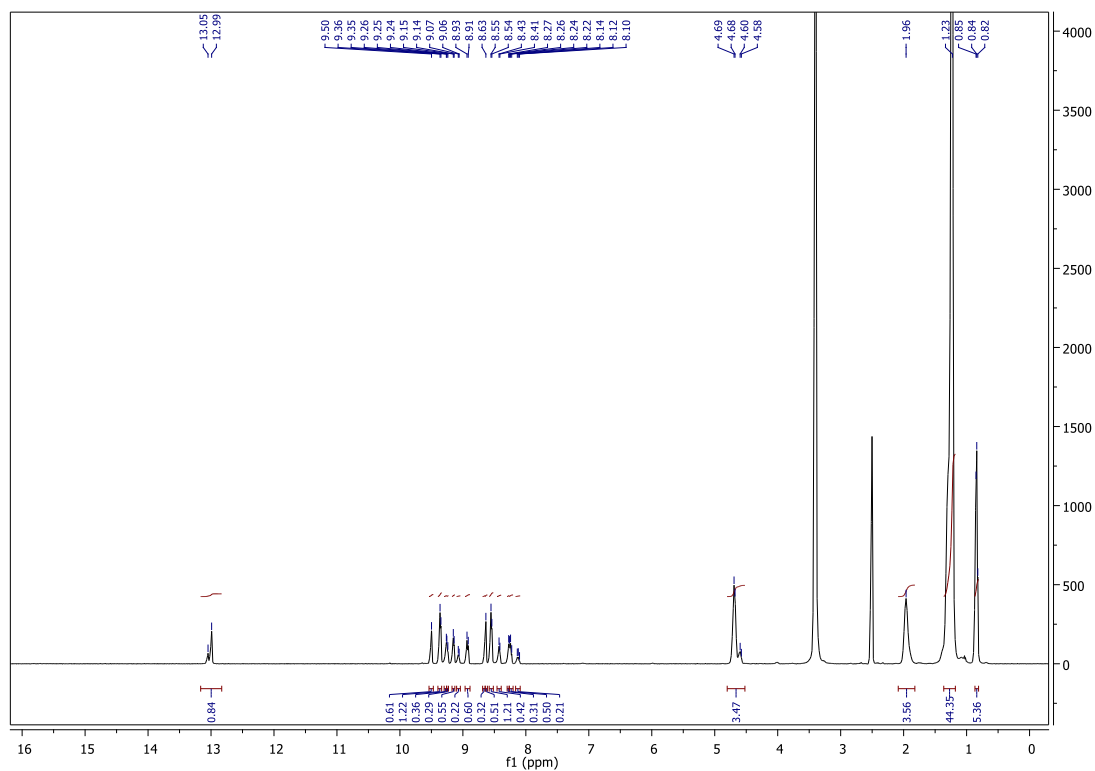

Figure S63.  $^1\text{H}$  NMR of Compound 29

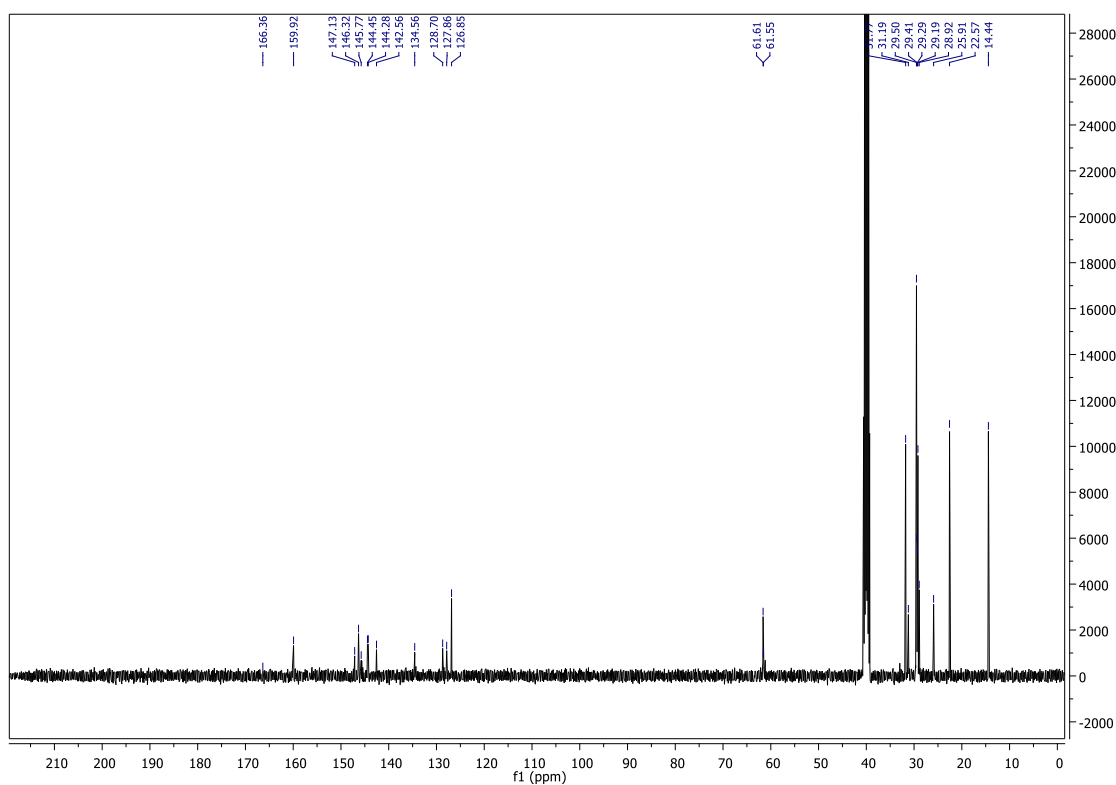

Figure S64.  $^{13}\text{C}$  NMR of Compound 29

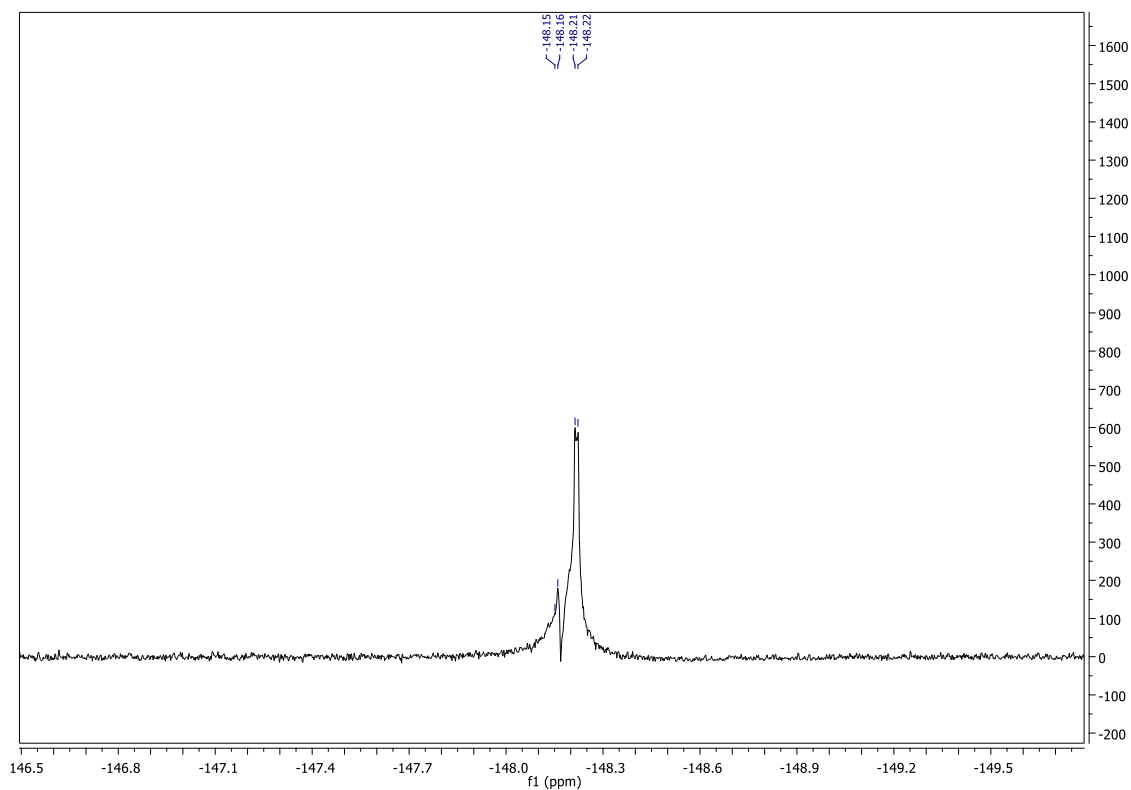

Figure S65.  $^{19}\text{F}$  NMR of Compound 29

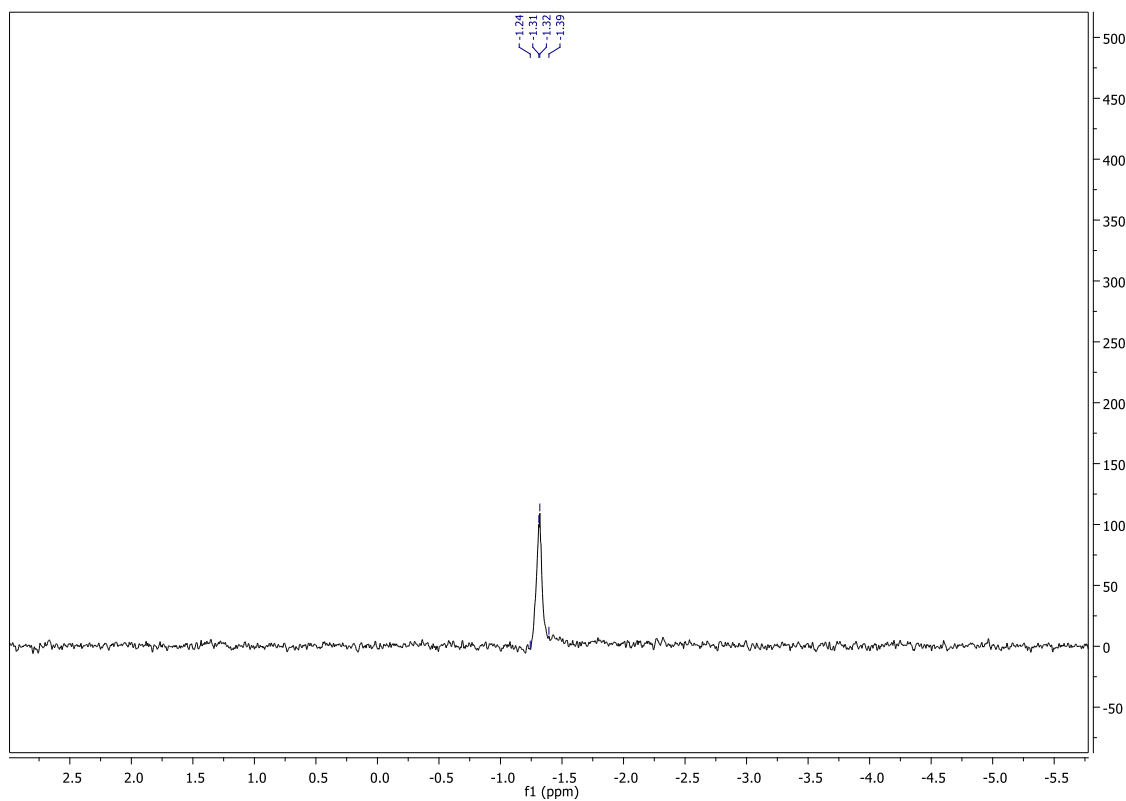

Figure S66.  $^{11}\text{B}$  NMR of Compound 29

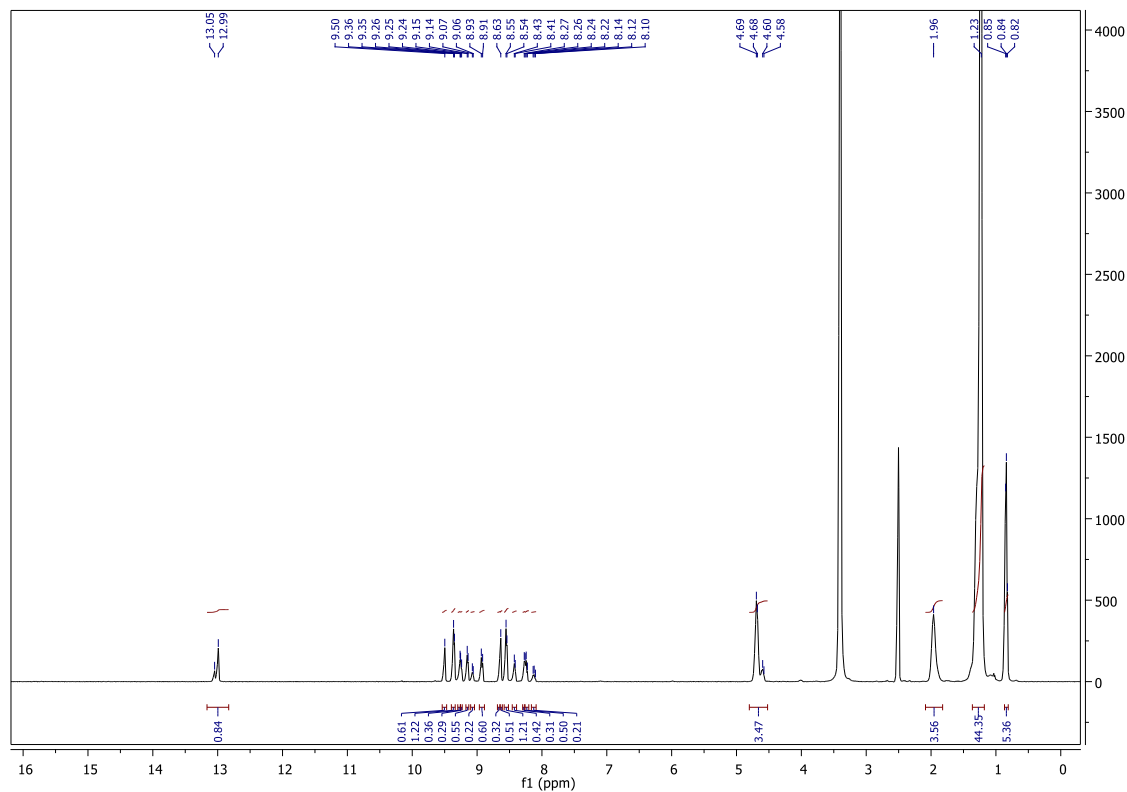

Figure S67.  $^1\text{H}$  NMR of Compound 30

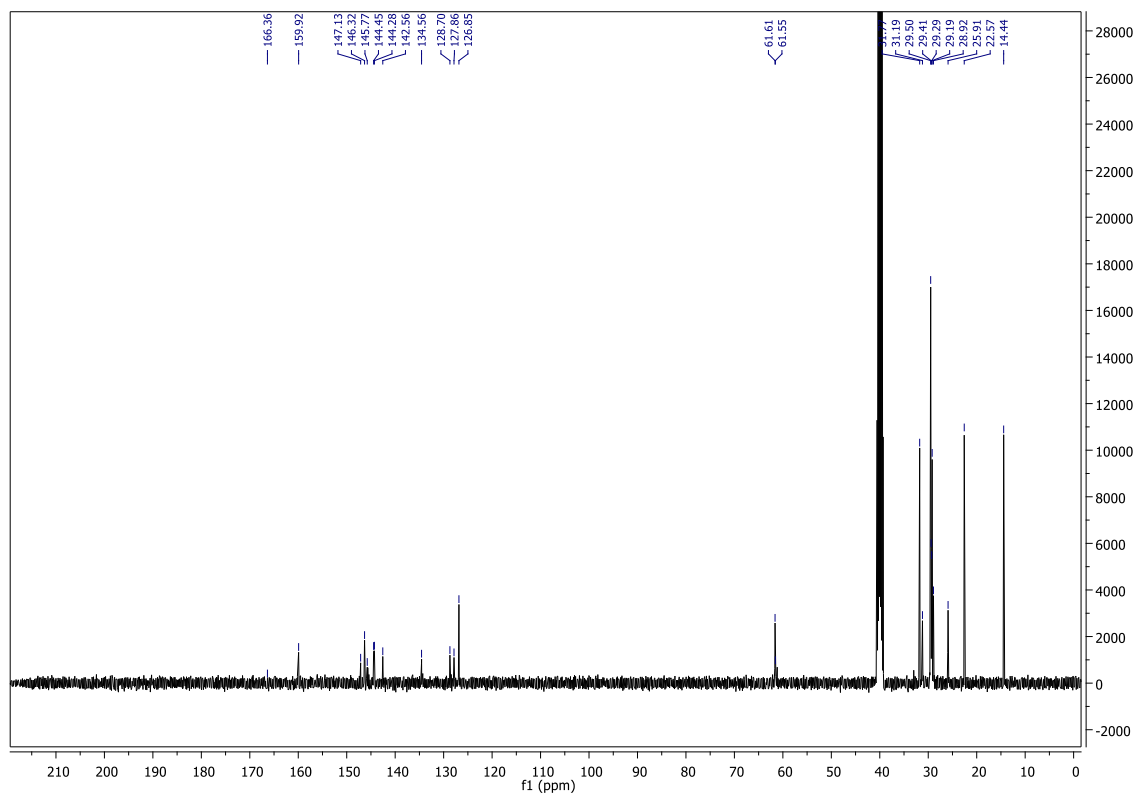

Figure S68.  $^{13}\text{C}$  NMR of Compound 30

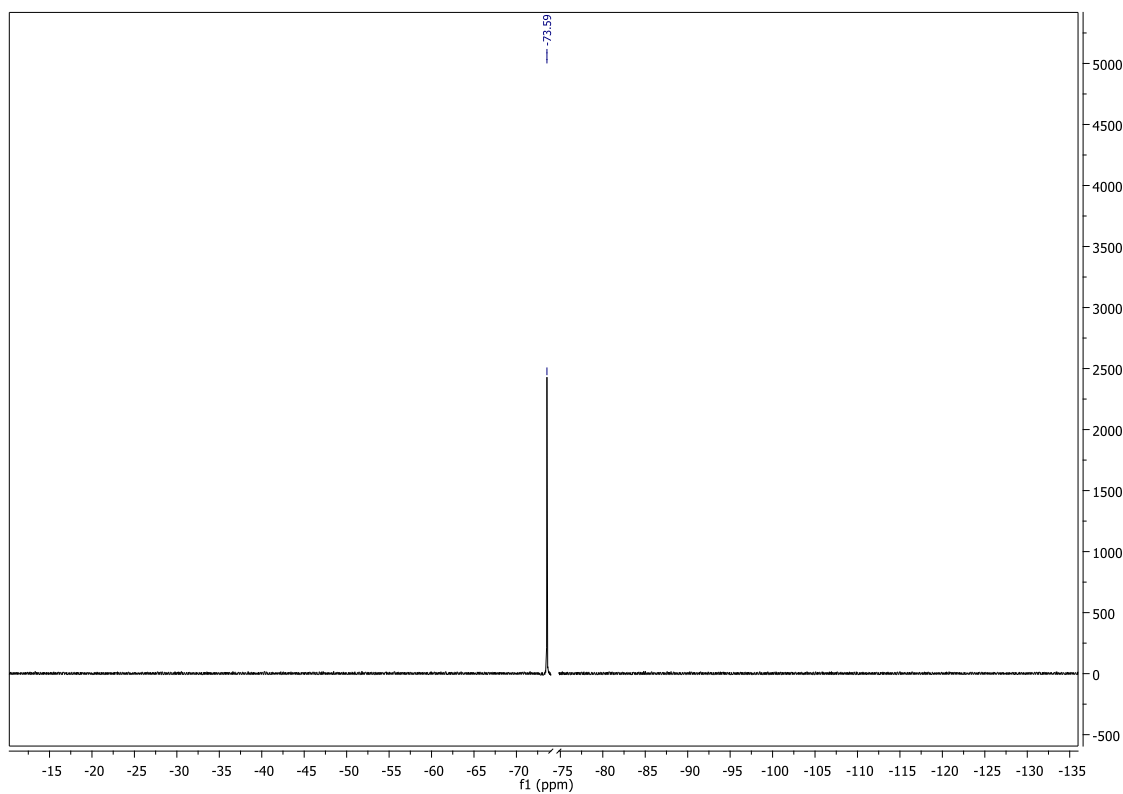

Figure S69.  $^{19}\text{F}$  NMR of Compound 30

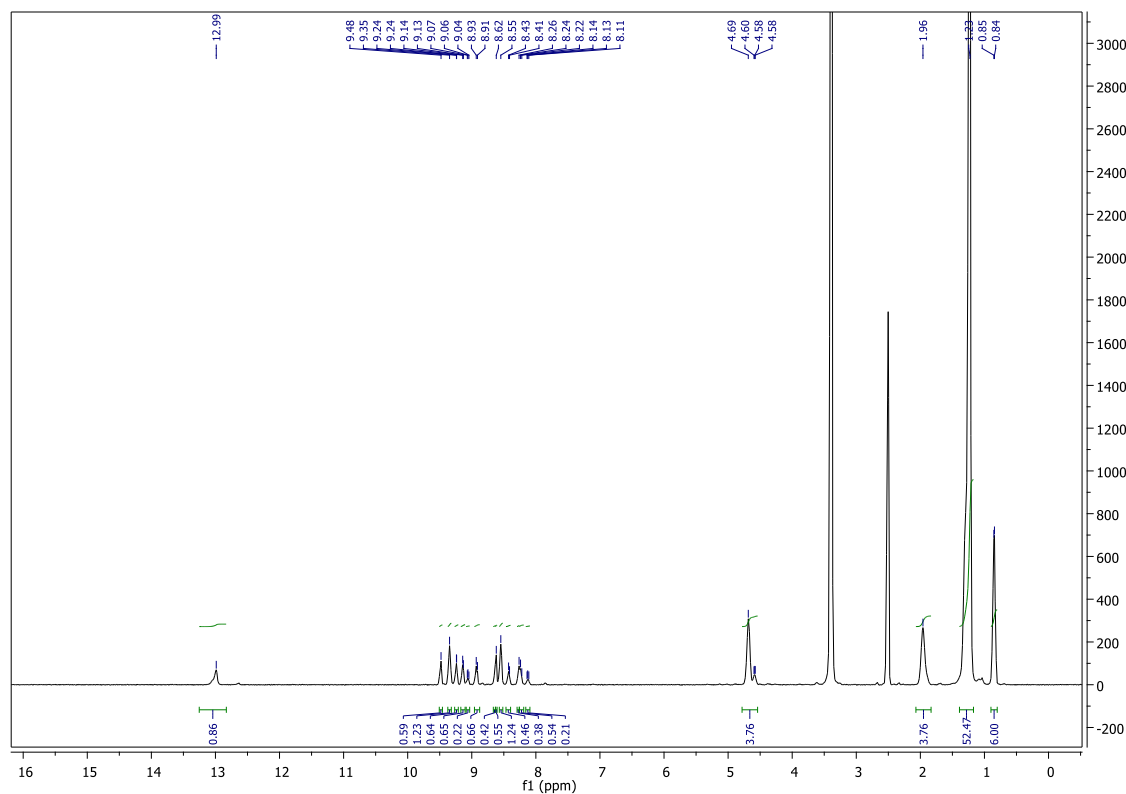

Figure S70.  $^1\text{H}$  NMR of Compound 31

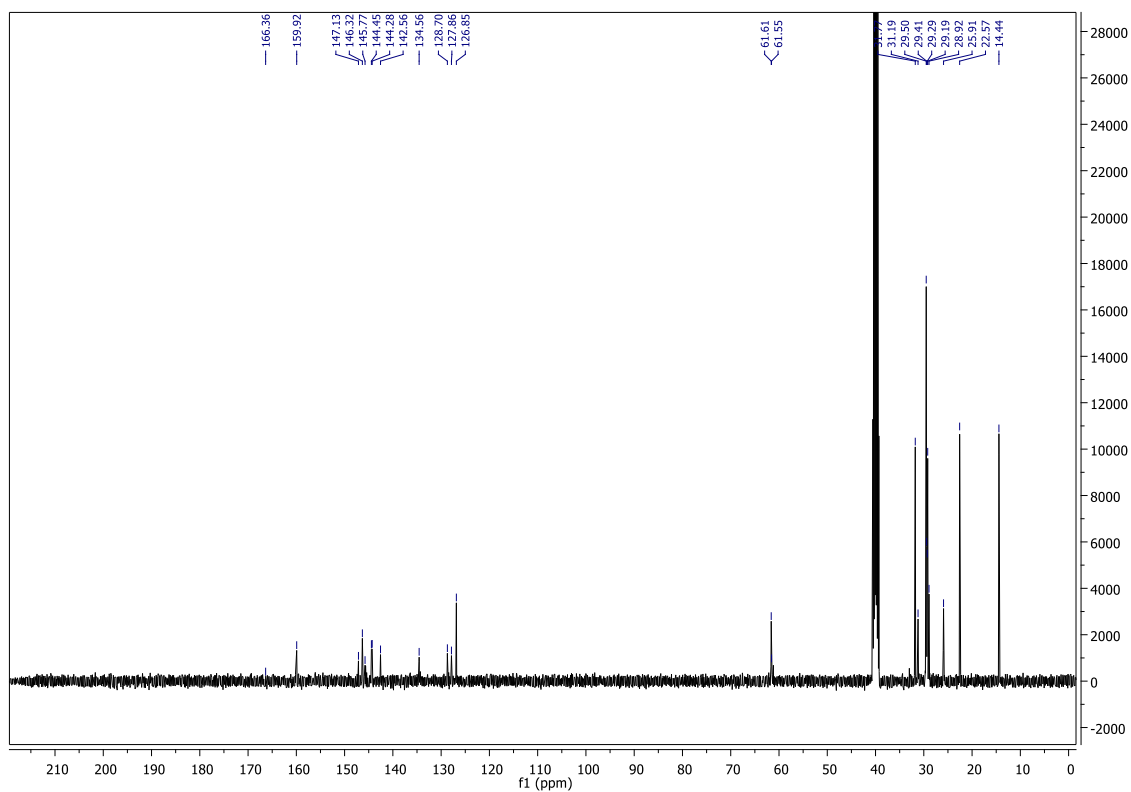

Figure S71.  $^{13}\text{C}$  NMR of Compound 31

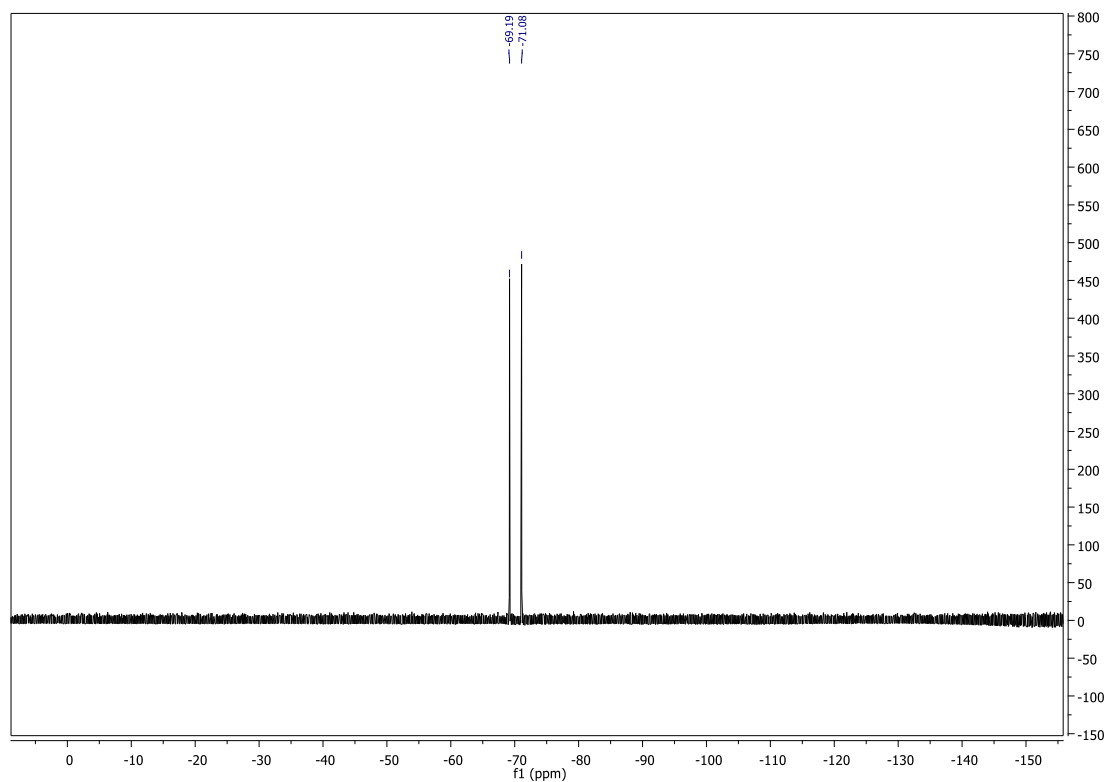

Figure S72.  $^{19}\text{F}$  NMR of Compound 31

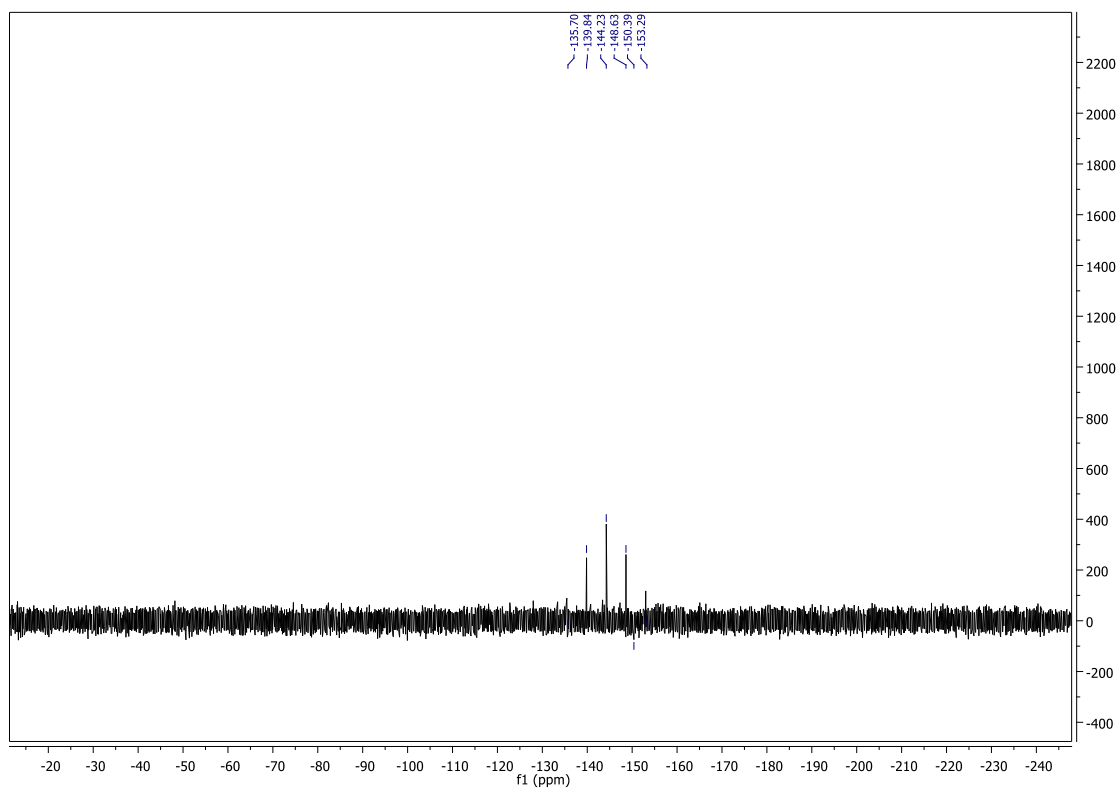

Figure S73. <sup>31</sup>P NMR of Compound 31

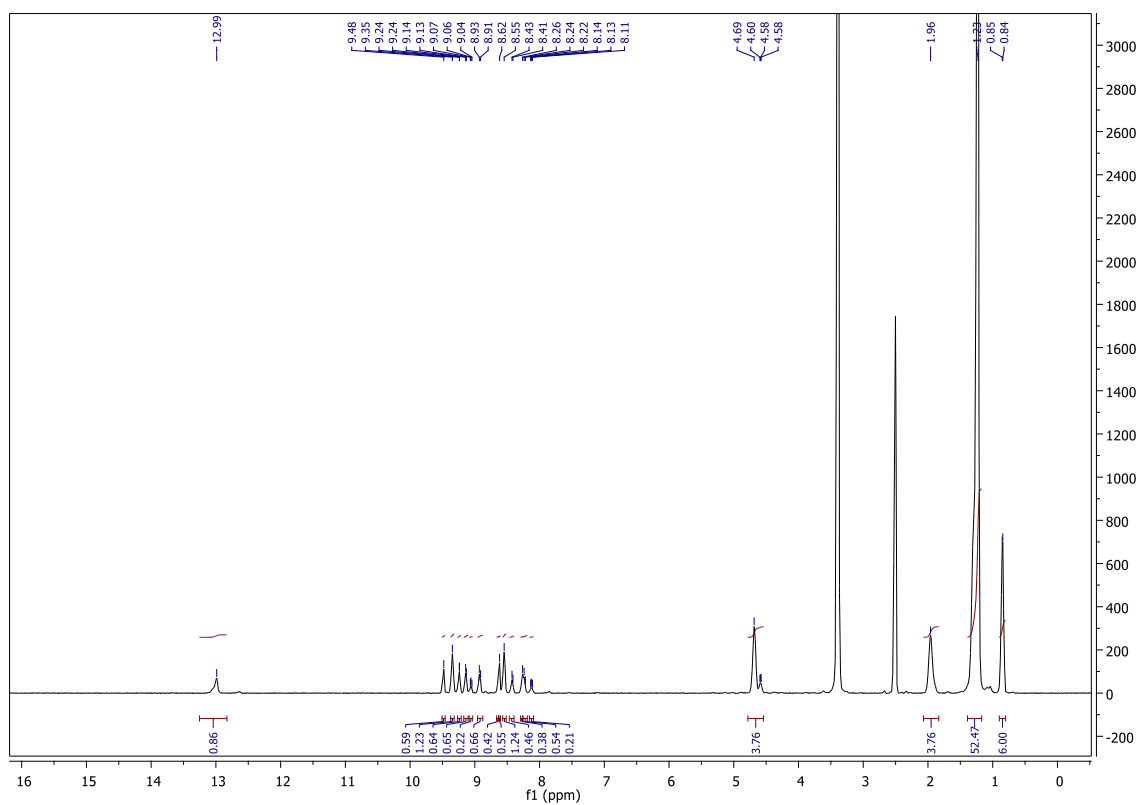

Figure S74. <sup>1</sup>H NMR of Compound 32

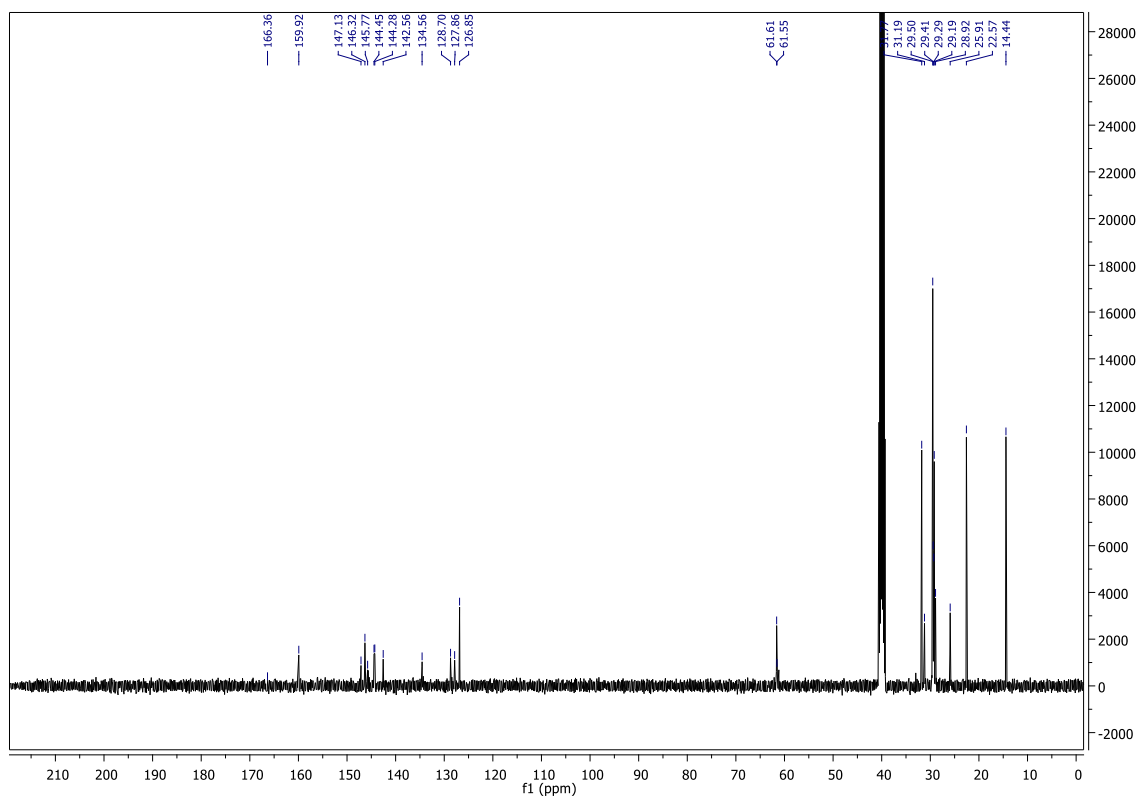

Figure S75.  $^{13}\text{C}$  NMR of Compound 32

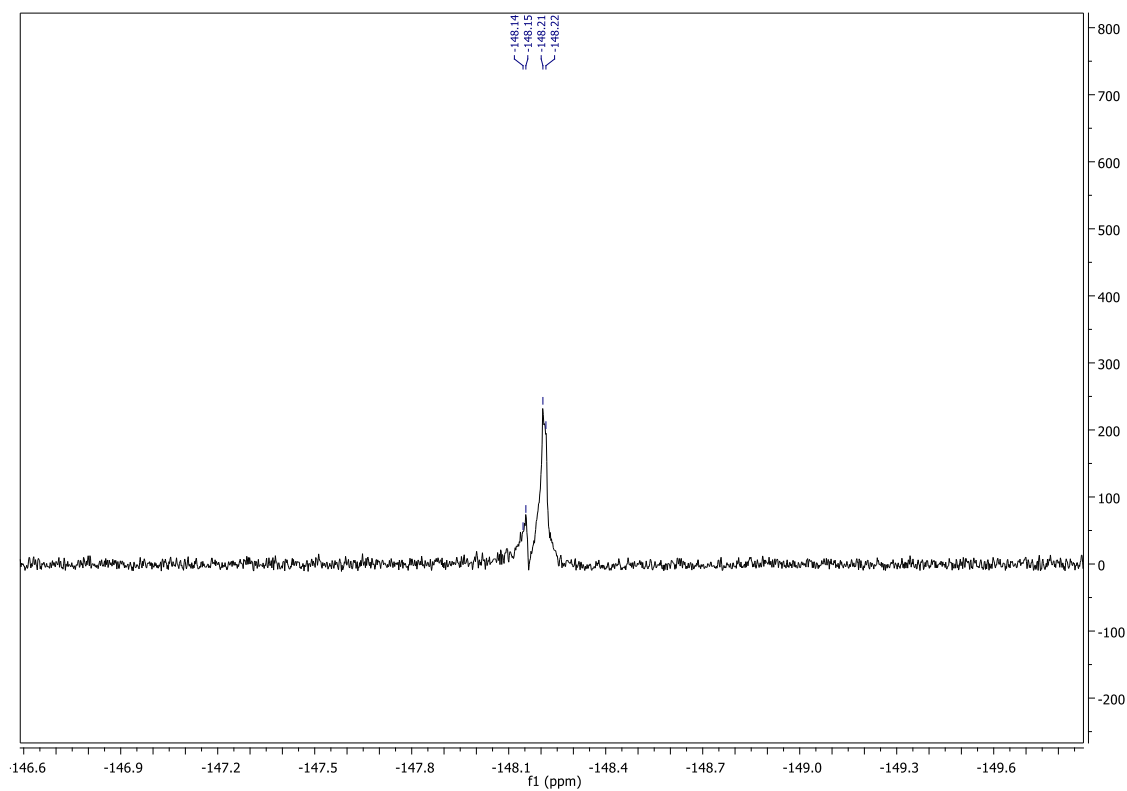

Figure S76.  $^{19}\text{F}$  NMR of Compound 32

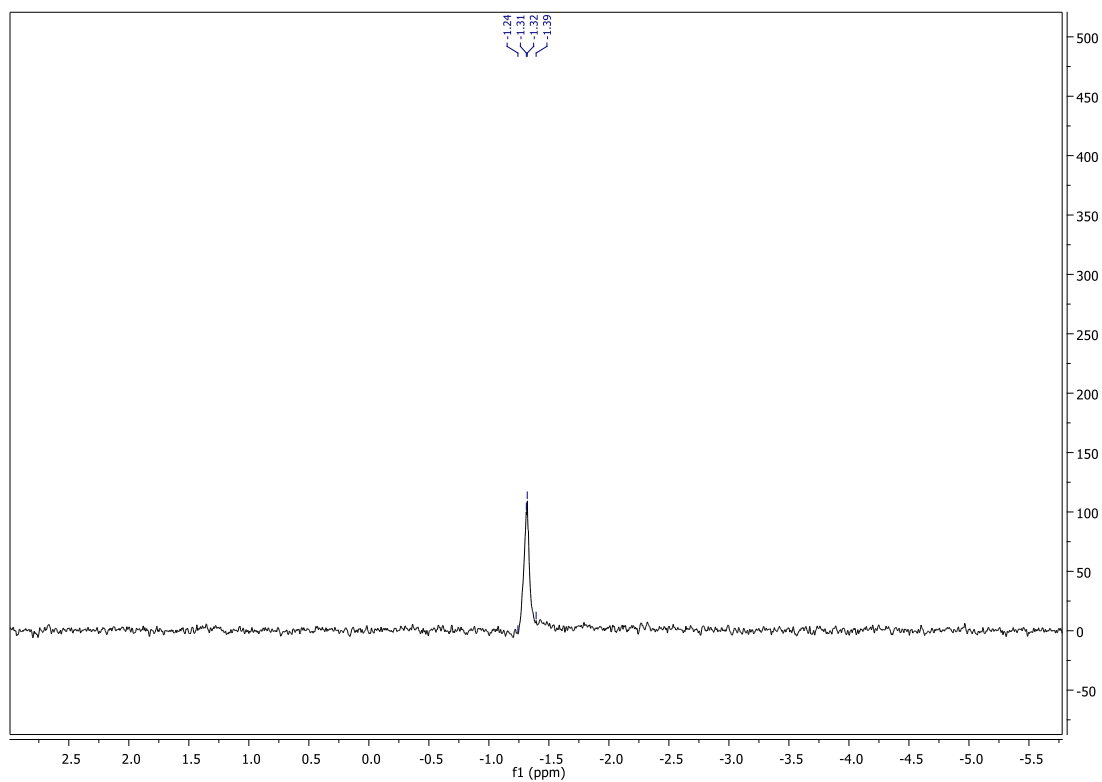

Figure S77.  $^{11}\text{B}$  NMR of Compound 32

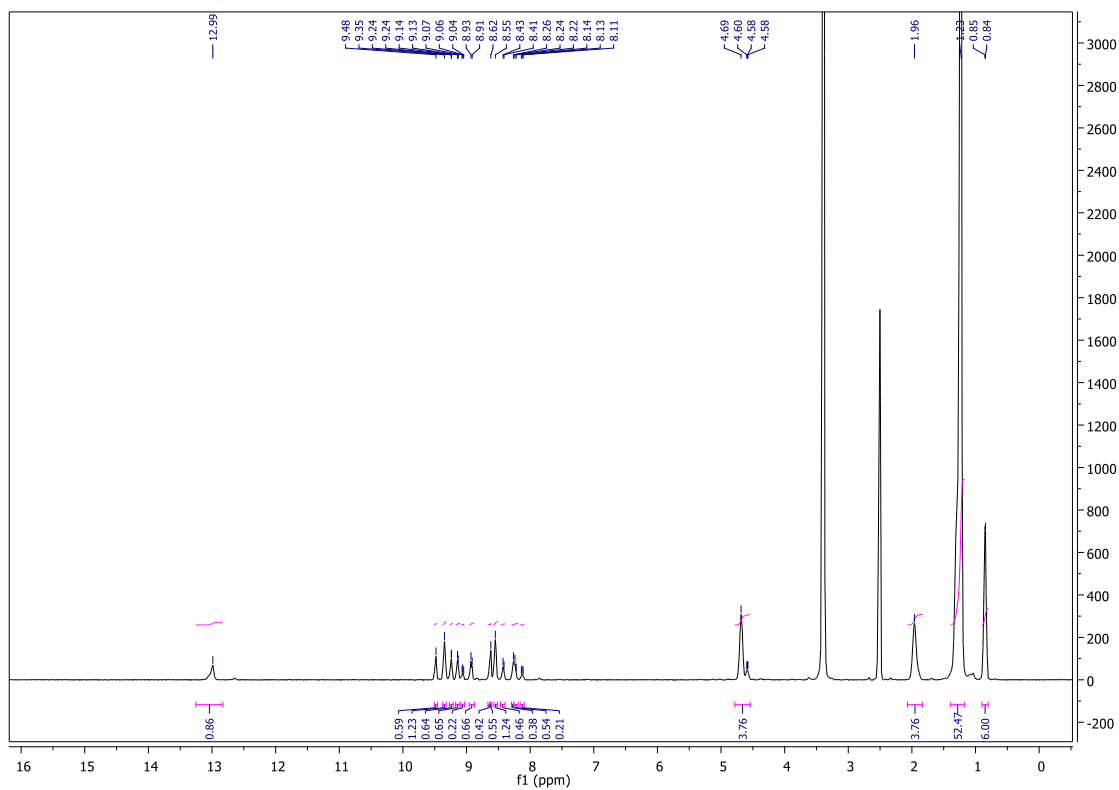

Figure S78.  $^1\text{H}$  NMR of Compound 33



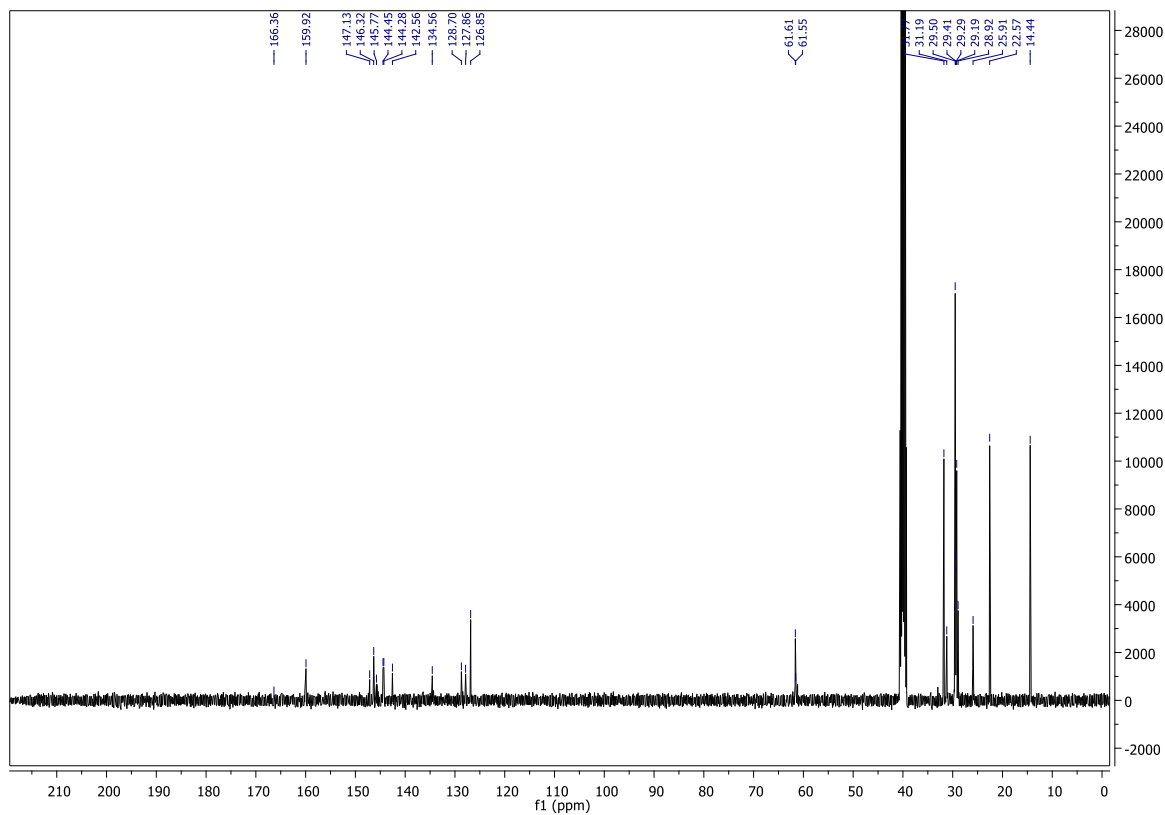

Figure S79. <sup>13</sup>C NMR of Compound 33

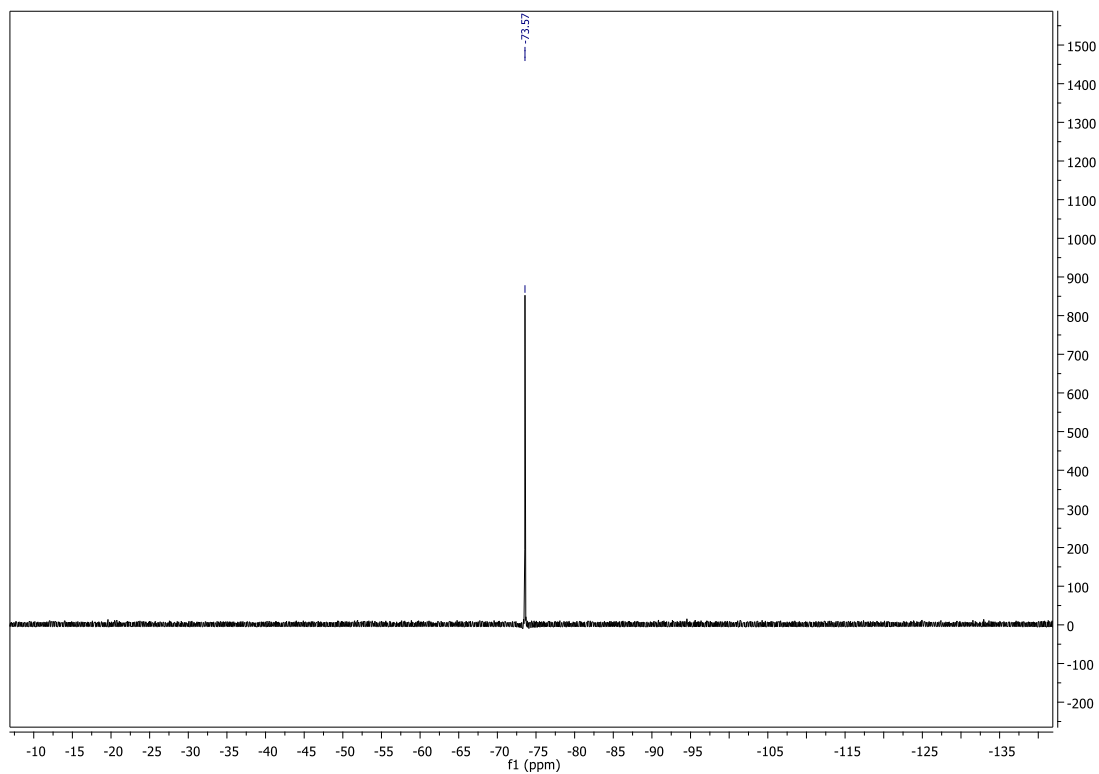

Figure S80. <sup>19</sup>F NMR of Compound 33

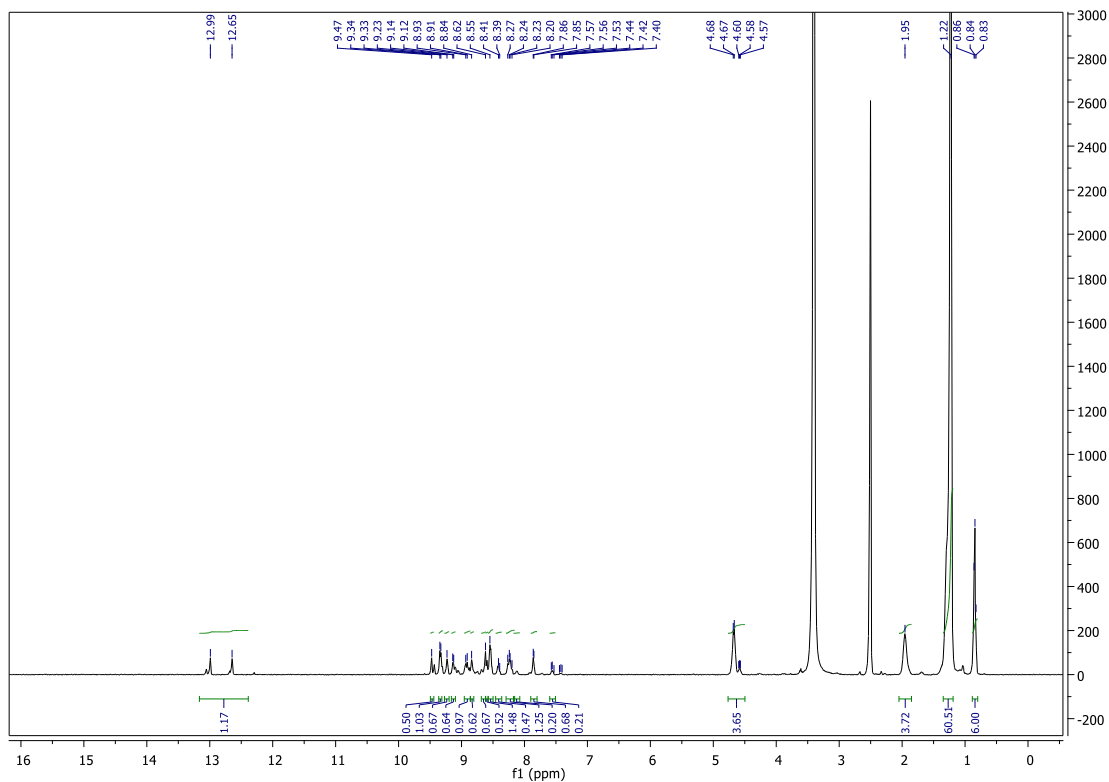

Figure S81.  $^1\text{H}$  NMR of Compound 34

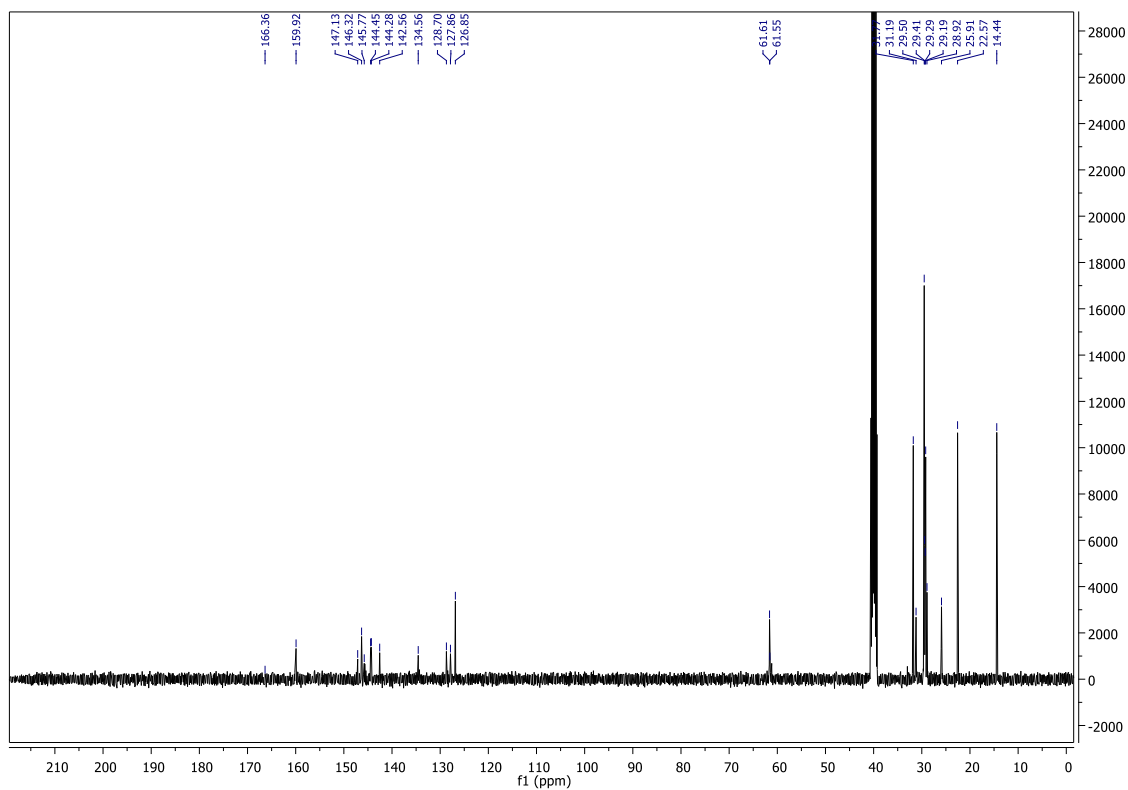

Figure S82.  $^{13}\text{C}$  NMR of Compound 34

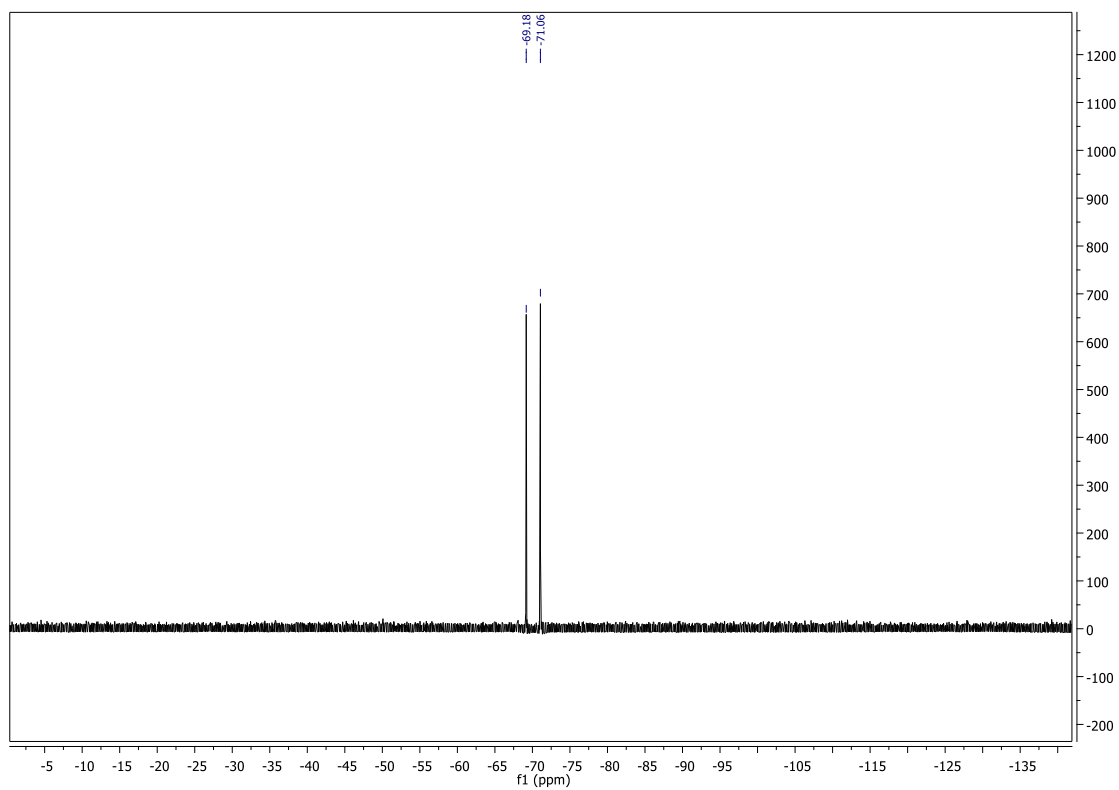

Figure S83.  $^{19}\text{F}$  NMR of Compound 34

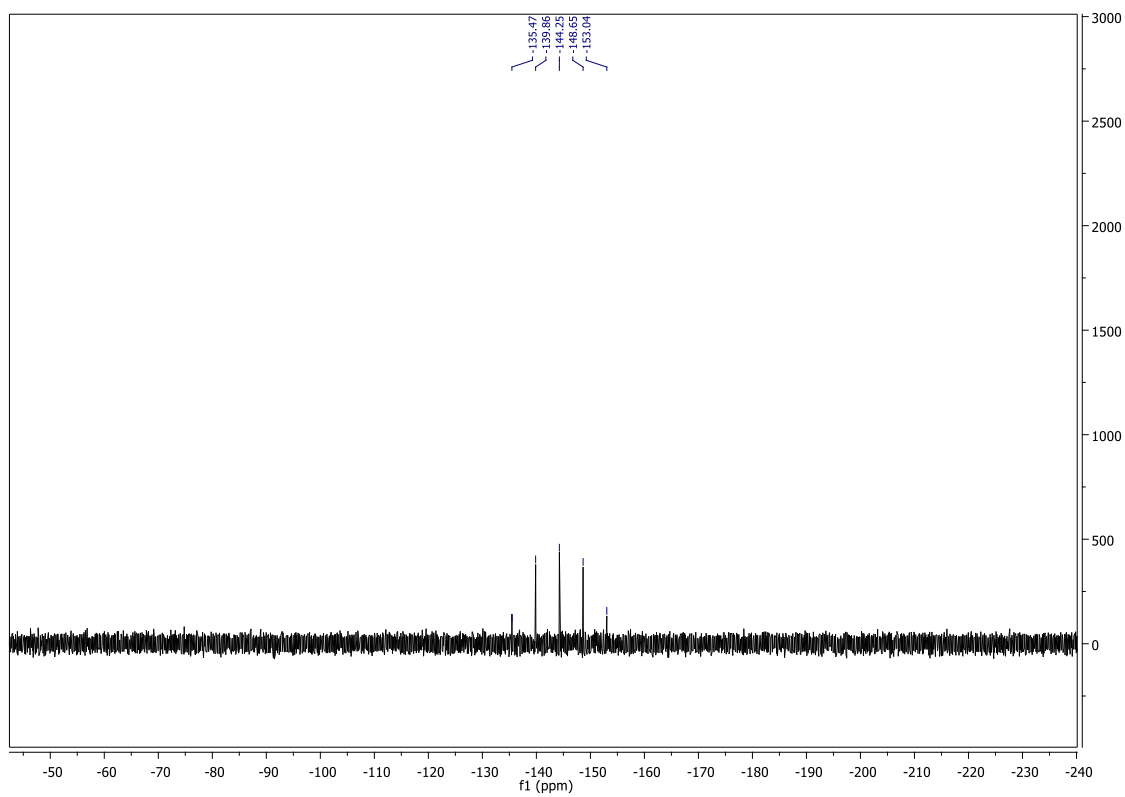

Figure S84.  $^{31}\text{P}$  NMR of Compound 34

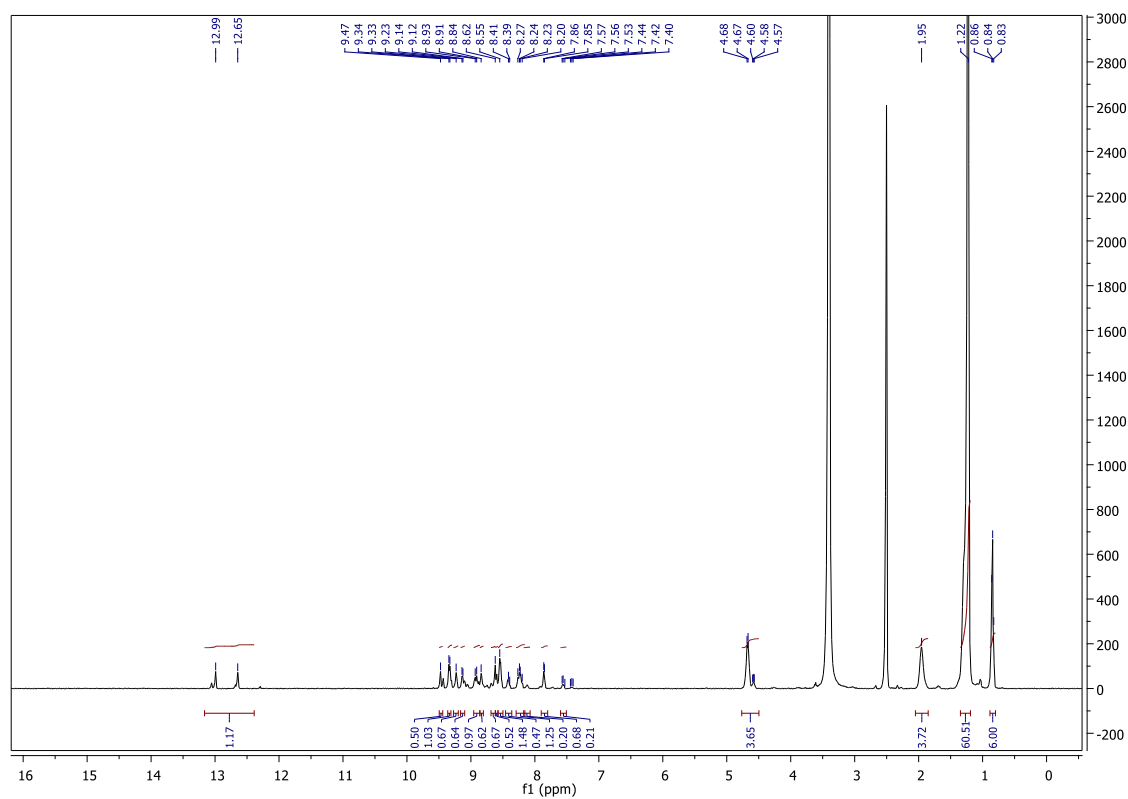

Figure S85.  $^1\text{H}$  NMR of Compound 35



Figure S86.  $^{13}\text{C}$  NMR of Compound 35

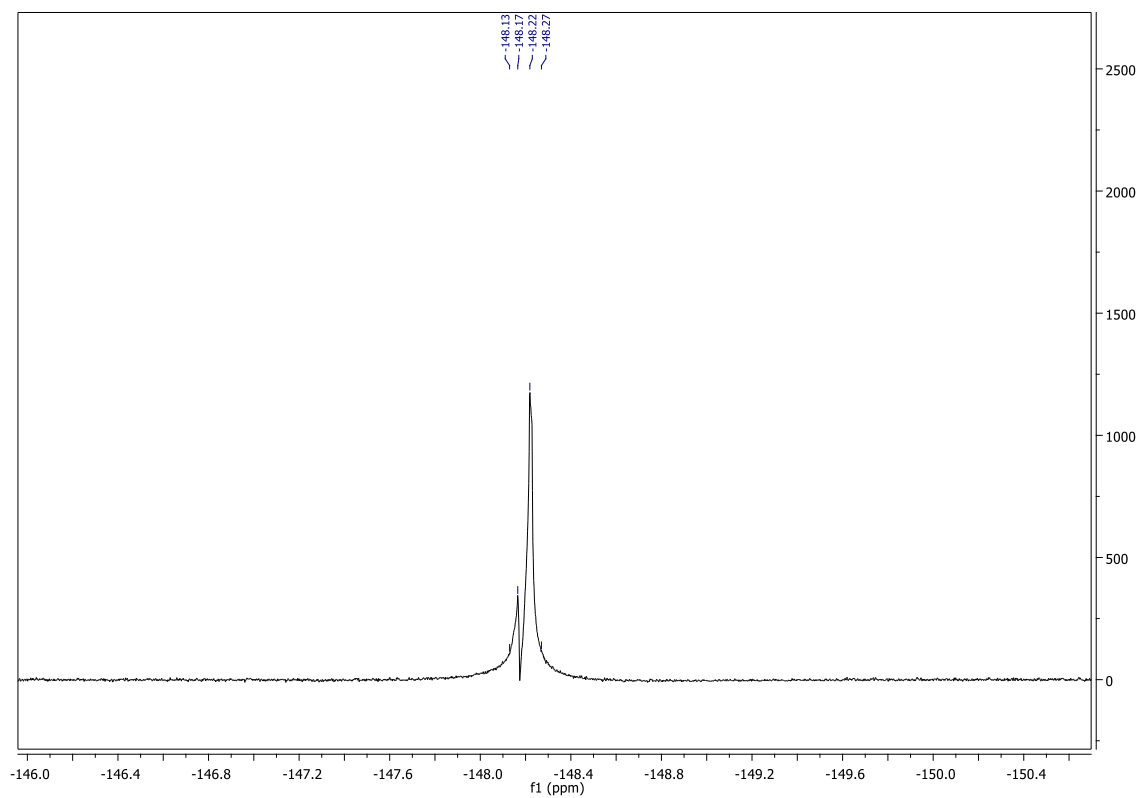

Figure S87.  $^{19}\text{F}$  NMR of Compound 35

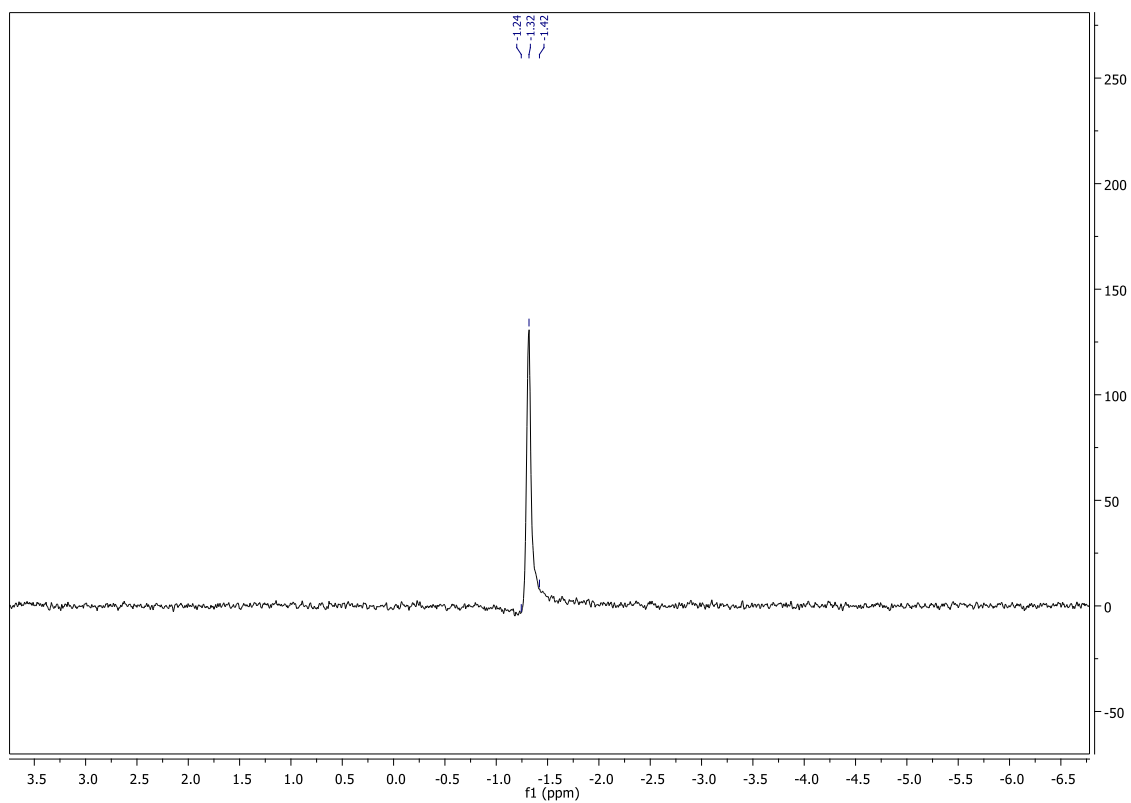

Figure S88.  $^{11}\text{B}$  NMR of Compound 35

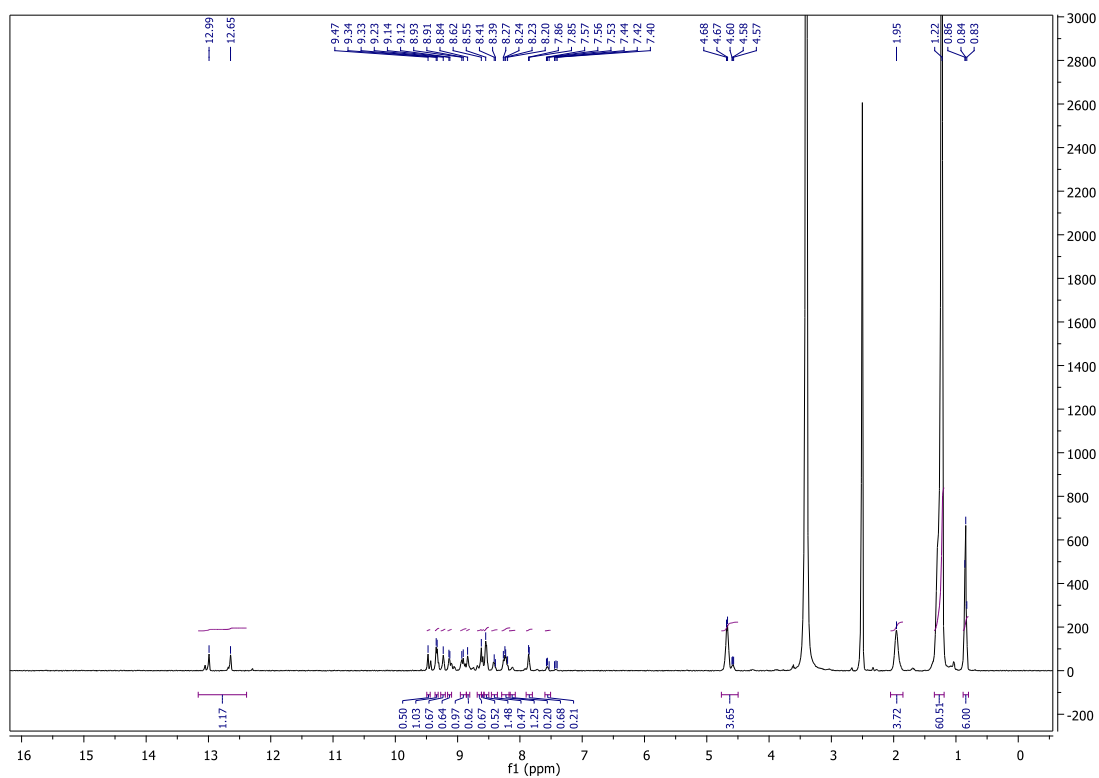

Figure S89.  $^1\text{H}$  NMR of Compound 36

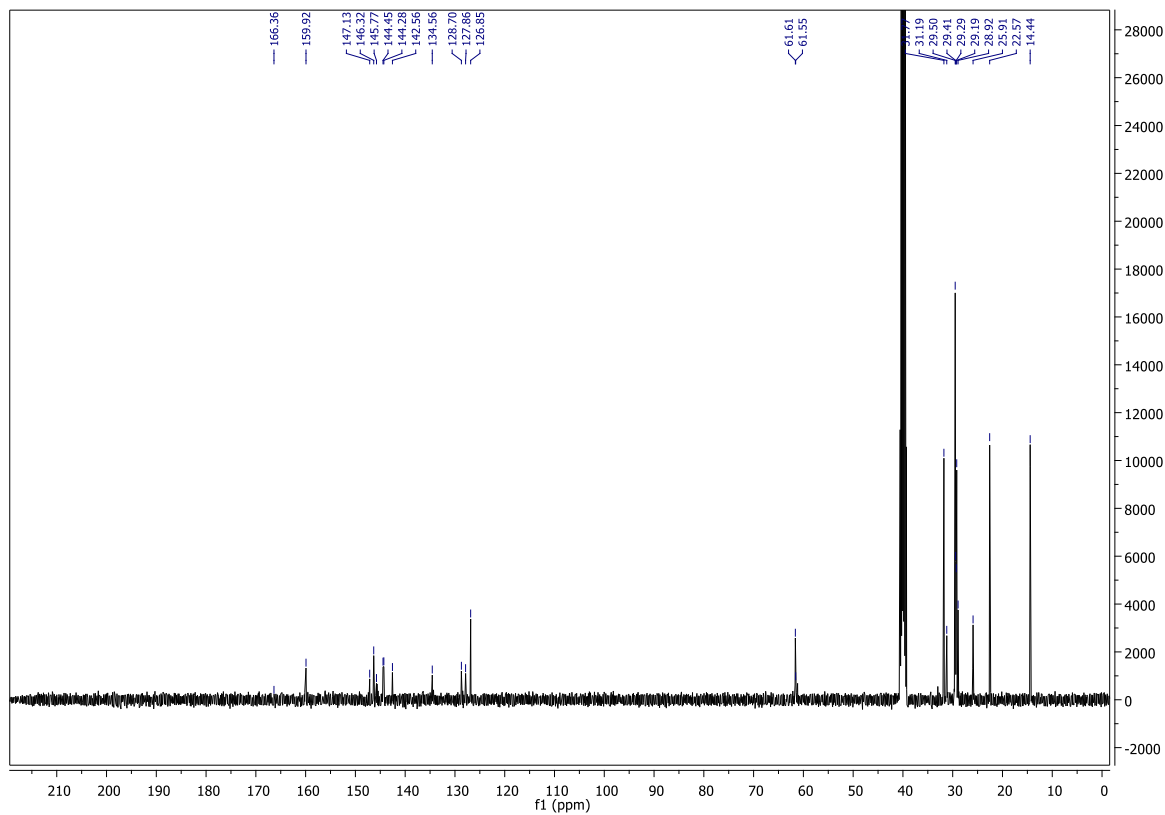

Figure S90.  $^{13}\text{C}$  NMR of Compound 36

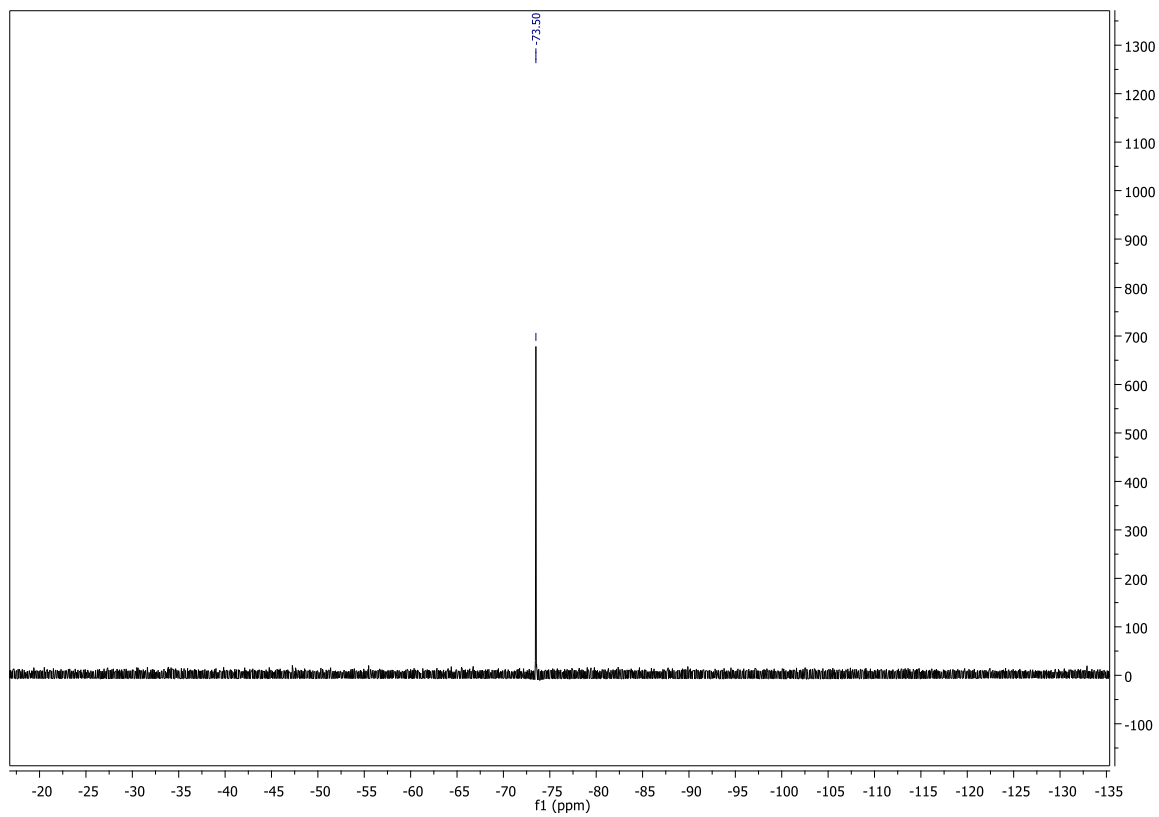

Figure S91.  $^{19}\text{F}$  NMR of Compound 36

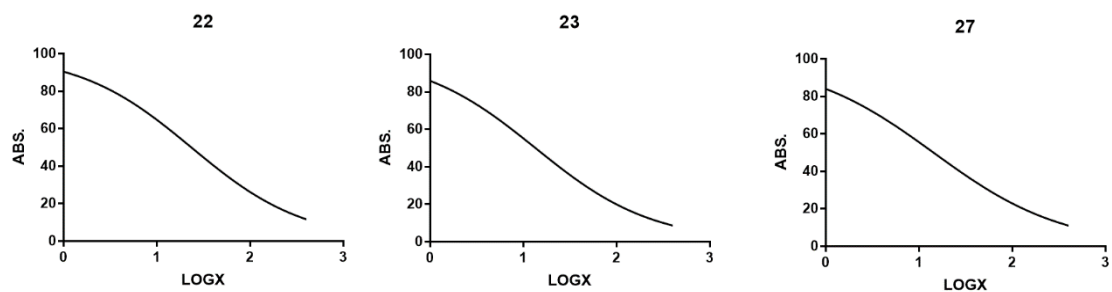

**Figure S92.:** Representative dose response curves
